# Supplementary material for: Palladium-catalyzed [4 + 2] cycloaddition of amido-tethered allylic carbonates with oxazol-5-(4H)-ones: synthesis of piperidine-2,6-dione derivatives
Source: Royal Society of Chemistry journal article supplement (doi:10.1039/d2qo01783k), 2022-12-10
Supplement: d2qo01783k1.pdf [file d2qo01783k1.pdf]

Electronic Supplementary Information

**Palladium-Catalyzed [4+2] Cycloaddition of Amido-Tethered  
Allylic Carbonates with Oxazol-5-(4*H*)-ones: Synthesis of  
Piperidine-2,6-dione Derivatives**

Lan Wang,<sup>a</sup> Min Liu,<sup>a</sup> Mengxi Lu,<sup>a</sup> Bo Wang,<sup>a</sup> Qihuan Han,<sup>a</sup> Jingrong Jin,<sup>a</sup> Songcheng Yu,<sup>b</sup> Yongjun  
Wu<sup>b</sup> and Hongchao Guo<sup>\*a</sup>

<sup>a</sup> Department of Chemistry and Innovation Center of Pesticide Research, China Agricultural  
University, Beijing 100193, China

<sup>b</sup> College of Public Health, Zhengzhou University, Zhengzhou 450001, P. R. China

E-mail: hchguo@cau.edu.cn

**CONTENTS**

|                                                                                     |     |
|-------------------------------------------------------------------------------------|-----|
| General Information                                                                 | S2  |
| Preparation of Starting Materials                                                   | S2  |
| General Procedure for Annulation Reaction                                           | S4  |
| The Gram-Scale Annulation Reaction                                                  | S5  |
| Further Transformations                                                             | S5  |
| Investigation of Asymmetric [4+2] Cycloaddition                                     | S6  |
| Characterization Data of All Products                                               | S7  |
| <sup>1</sup> H, <sup>13</sup> C and <sup>19</sup> F NMR and Spectra of All Products | S30 |
| HPLC Chromatograms of the Product <b>3aa</b>                                        | S76 |
| X-ray Crystallographic Data of Product <b>3aa</b> , <b>4aa</b> and <b>5aa</b>       | S77 |

## General Information

All reactions were performed under N<sub>2</sub> atmospheres in glassware with magnetic stirring. Unless otherwise stated, all reagents were purchased from commercial suppliers and used without further purification. All solvents were purified and dried according to standard methods prior to use. Organic solutions were concentrated under reduced pressure on a rotary evaporator or an oil pump. Reactions were monitored through thin layer chromatography (TLC) on silica gel–precoated glass plates. Chromatograms were visualized by fluorescence quenching with UV light at 254 nm. Flash column chromatography was performed using Qingdao Haiyang flash silica gel (200-300 mesh). <sup>1</sup>H, <sup>13</sup>C NMR spectra were recorded in CDCl<sub>3</sub> using a 300MHz or 500MHz NMR instrument (referenced internally to Me<sub>4</sub>Si). Chemical shifts (δ, ppm) are relative to tetramethylsilane (TMS) with the resonance of the non-deuterated solvent or TMS as the internal standard. <sup>1</sup>H NMR data are reported as follows: chemical shift, multiplicity (s = singlet; d = doublet; t = triplet; m = multiplet), coupling constant (Hz), and integral. Data for <sup>13</sup>C NMR is reported in terms of chemical shift. Optical rotation was obtained on an Autopol V Plus polarimeter. Accurate mass measurements were performed with an Agilent instrument equipped with the ESI-MS technique.

## Preparation of Starting Materials

### Representative Procedure for the Preparation of tert-butyl (1-phenyl-2-(phenylcarbamoyl)allyl) carbonate<sup>1</sup>

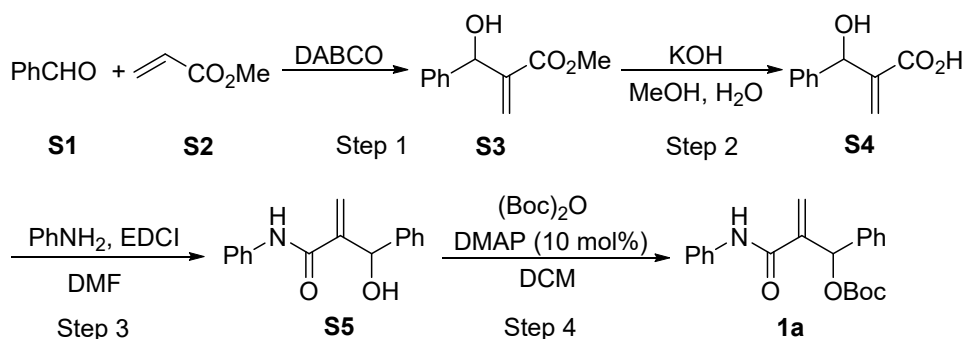

(1) The DABCO (100 mmol, 11.2 g) was dissolved into the mixture of benzaldehyde **S1** (100 mmol, 10.2 mL) and methyl acrylate **S2** (150 mmol, 13.4 mL) and the mixture was stirred at room

<sup>1</sup> (a) H. L. Cui, L. Jiang, H. Tan, S. Liu, *Adv. Synth. Catal.* **2019**, *361*, 4772–4780. (b) S. W. Liu, D. D. Ma, X. X. Zhu, H. L. Cui. *Chem Asian J.* **2020**, *9*, 1617–1622.

temperature for 3 days or until complete consumption of the starting material as determined by TLC. Then, the product was extracted with EtOAc (50 mL  $\times$  3) and the organic layers were combined, washed with saturated brine and dried with Na<sub>2</sub>SO<sub>4</sub>. The solvent was removed under vacuum and the crude product was purified by column chromatography (Petroleum ether: EtOAc = 5: 1) to give the product methyl 2-(hydroxy(phenyl)methyl)acrylate **S3** as colorless oily liquid (18.94 g, 98.6% yield).

- (2) The product methyl 2-(hydroxy(phenyl)methyl)acrylate **S3** (18.94 g, 98.6 mmol) was dissolved into 60 mL of MeOH, then KOH (aqueous) (6.7 g of KOH dissolved into 120 mL of H<sub>2</sub>O) was added via dropper. The mixture was stirred at room temperature for 15 hours. After the reaction was complete, the pH of solution was adjusted to 1 with HCl (aqueous). Then, the solution was extracted with EtOAc (50 mL  $\times$  3) and the organic layers were combined, washed with saturated brine, dried with Na<sub>2</sub>SO<sub>4</sub>. The solvent was removed under vacuum to give the product **S4** as colorless oily liquid (17.2 g, 98% yield) without further purification.
- (3) The EDCI (35.7 mmol, 6.8 g) was dissolved into the mixture of **S4** (29.8 mmol, 5.3 g) and aniline (35.7 mmol, 3.2 mL) in 60 mL of DMF. The resulting mixture was stirred at room temperature overnight, and then 50 mL of water was added into the mixture. The resulting mixture was extracted with EtOAc. The organic layer was washed with water for three times and dried with Na<sub>2</sub>SO<sub>4</sub>. The solvent was removed under vacuum. The crude product was purified by flash column (Petroleum ether : EtOAc = 2: 1) to give the product **S5** as white solid (5.3 g, 71% yield).
- (4) The product **S5** (21 mmol, 5.3 g) was dissolved into 30 mL of CH<sub>2</sub>Cl<sub>2</sub>, then the mixture of (Boc)<sub>2</sub>O (23.1 mmol, 5.5 mL) and DMAP (2.1 mmol, 258 mg) in 15 mL of CH<sub>2</sub>Cl<sub>2</sub> was added into the former solution via dropper. The resulting mixture was stirred at 0 °C for 20 min and then was monitored through TLC. Once the reaction was complete, the reaction was quenched with 1N HCl and the reaction mixture was washed with NaHCO<sub>3</sub> (aqueous) and the organic layer was dried with Na<sub>2</sub>SO<sub>4</sub>. After the solvent was removed under vacuum, the crude product was purified by column chromatography (Petroleum ether : EtOAc = 8: 1) to give the final product **1a** as white solid (5.0 g, 66% yield).

## Representative Procedure for the Preparation of 4-(*tert*-butyl)-2-phenyloxazol-5(4*H*)-one **2a**<sup>2</sup>

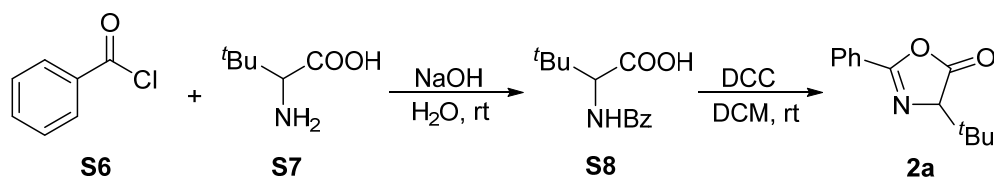

The NaOH (3.4 g, 85 mmol) and benzoyl chloride **S6** (4.9 mL, 42 mmol) sequentially were added to the aqueous solution of *tert*-leucine **S7** (5.03 g, 38.3 mmol). This heterogeneous mixture was stirred overnight. Once the reaction mixture became homogeneous, the product amide was then precipitated by the slow addition of aqueous HCl (2 N), isolated by filtration, and dried thoroughly under high vacuum. This chalky white solid was dissolved in CH<sub>2</sub>Cl<sub>2</sub> (50 mL), and then 1,3-dicyclohexylcarbodiimide (8.05 g, 39.0 mmol) was added to the mixture. The resulting heterogeneous mixture was stirred at rt overnight and then was filtered. The filtrate was washed with aqueous HCl (2 N; 100 mL), dried with anhydrous Na<sub>2</sub>SO<sub>4</sub>, and concentrated. The desired product was purified by flash chromatography through a short pad of silica gel (5% ethyl acetate in hexanes), affording final product **2a** as a white solid (6.95 g, 84%, two steps).

## General Procedure for Annulation Reaction

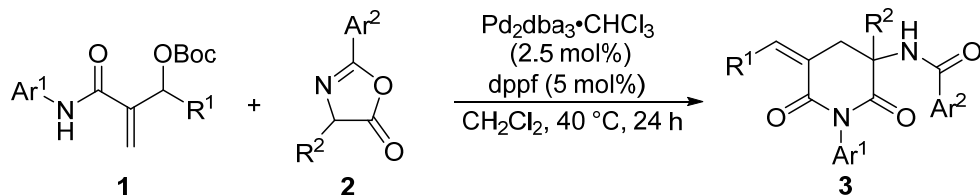

Under a nitrogen atmosphere, an oven-dried 10 mL of Schlenk tube was charged with *tert*-butyl (1-phenyl-2-(phenylcarbamoyl)allyl)carbonate **1** (0.12 mmol), 4-(*tert*-butyl)-2-phenyloxazol-5(4*H*)-one **2** (0.1 mmol), Pd<sub>2</sub>(dba)<sub>3</sub>·CHCl<sub>3</sub> (2.5 mol%, 2.6 mg), dppf (5 mol%, 2.8 mg) and 1 mL of CH<sub>2</sub>Cl<sub>2</sub>. The reaction solution was then vigorously stirred at 40 °C. Once the starting material was completely consumed (monitored by TLC), the mixture was concentrated to dryness. The residue was purified by flash column to afford the product **3**.

<sup>2</sup> Forrest O. Arp and Gregory C. Fu. *J. Am. Chem. Soc.* **2006**, 128, 44, 14264–14265

## The Gram-scale Annulation Reaction

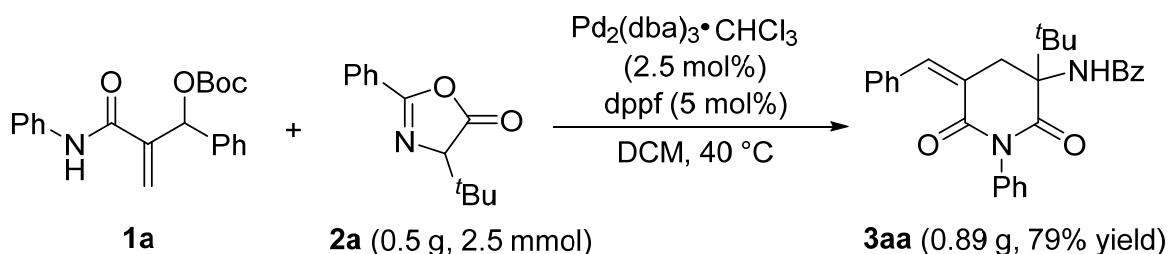

Under a nitrogen atmosphere, an oven-dried 50 mL of Schlenk tube was charged with *tert*-butyl (1-phenyl-2-(phenylcarbamoyl)allyl)carbonate **1a** (1.1 g), 4-(*tert*-butyl)-2-phenyloxazol-5(4*H*)-one **2a** (0.5 g),  $\text{Pd}_2(\text{dba})_3 \cdot \text{CHCl}_3$  (2.5 mol%),  $\text{dppf}$  (5 mol%) and 25 mL of  $\text{CH}_2\text{Cl}_2$ . The reaction solution was then vigorously stirred at  $40^\circ\text{C}$ . Once the starting material was completely consumed (monitored by TLC), the mixture was concentrated to dryness. The residue was purified by flash column to afford the product **3aa** (0.89 g, 79% yield).

## Further Transformations

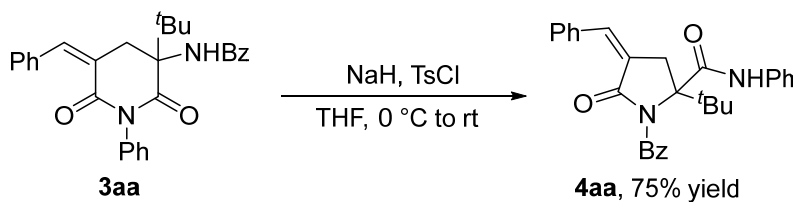

The  $\text{NaH}$  (1.1 equiv.) was slowly added to the solution of **3aa** (45.2 mg, 0.1 mmol) in 1 mL of THF in an oven-dried 10 mL of Schlenk tube at  $0^\circ\text{C}$ . The temperature was allowed to warm to room temperature, and the mixture was further stirred at  $\text{rt}$  for 30 min. The  $\text{TsCl}$  (1.5 equiv.) was added and the resulting mixture was stirred for 4 h. Once the starting material was completely consumed (monitored by TLC), the mixture was concentrated to dryness. The residue was purified by flash column to afford the product **4aa** (33.8 mg, 75% yield).

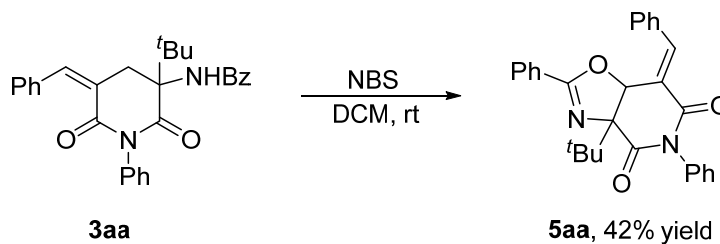

An oven-dried 10 mL of Schlenk tube was charged with **3aa** (45.2 mg, 0.1 mmol), NBS (3.0 equiv.) and 1 mL of CH<sub>2</sub>Cl<sub>2</sub>. The resulting mixture was stirred at rt for 48 h. Once the starting material was completely consumed (monitored by TLC), the mixture was concentrated to dryness. The residue was purified by flash column to afford the product **5aa** (18.9 mg, 42% yield).

**Table S1. Investigation of Asymmetric [4+2] Cycloaddition**

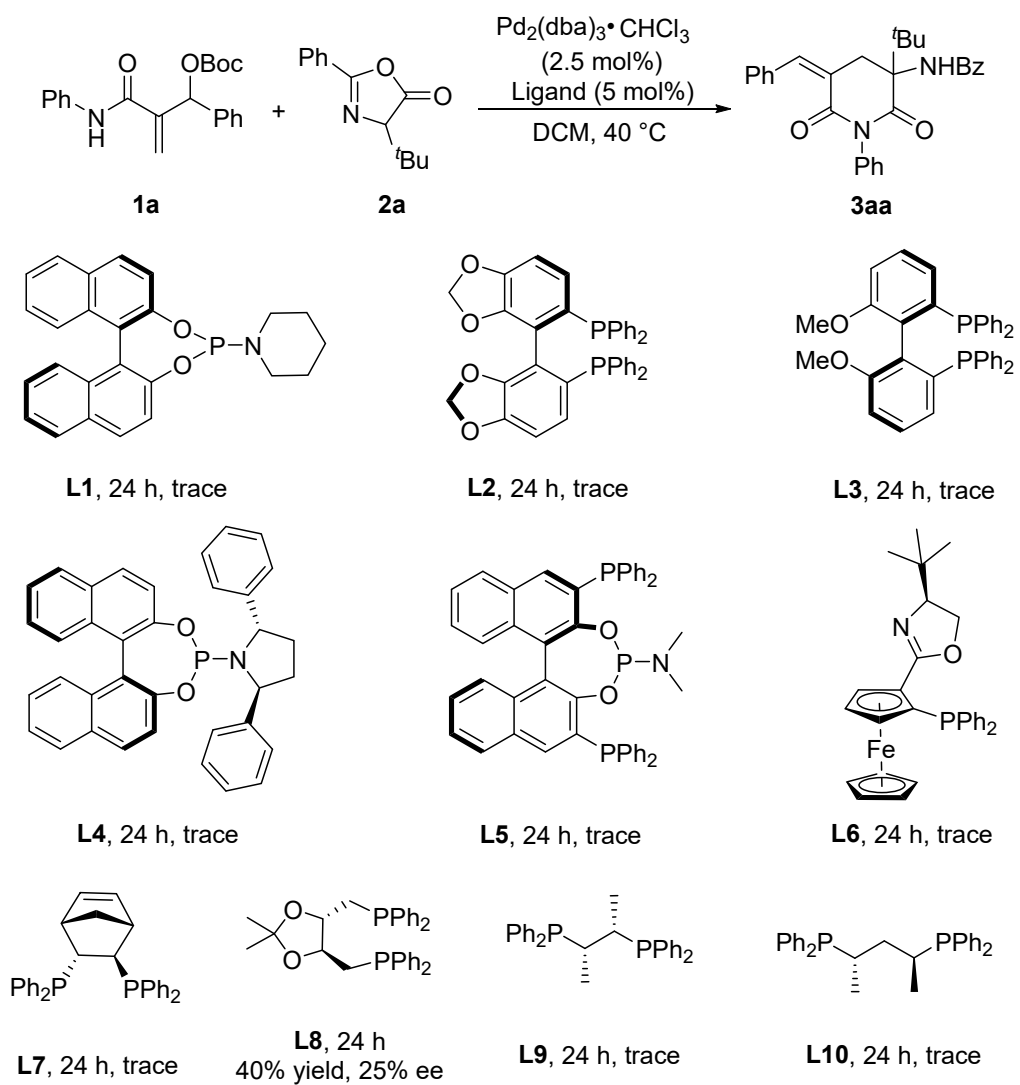

## Characterization Data of All Products

### (Z)-N-(5-benzylidene-3-(tert-butyl)-2,6-dioxo-1-phenylpiperidin-3-yl)benzamide (3aa)

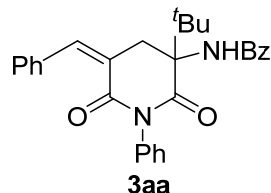

The title compound **3aa** was prepared according to the general procedure as described above in 86% yield (38.9 mg). It was purified by flash column chromatography (Petroleum ether : EtOAc = 5:1) to afford white solid. mp = 159 – 161 °C. <sup>1</sup>H NMR (500 MHz, CDCl<sub>3</sub>) δ 7.76 (d, *J* = 7.5 Hz, 2H), 7.55 (d, *J* = 6.9 Hz, 2H), 7.51 (d, *J* = 7.4 Hz, 2H), 7.49 – 7.42 (m, 4H), 7.39 (t, *J* = 7.4 Hz, 1H), 7.35 – 7.28 (m, 3H), 7.24 (d, *J* = 7.4 Hz, 2H), 7.08 (s, 1H), 6.86 (s, 1H), 3.75 – 3.65 (m, 2H), 1.34 (s, 9H). <sup>13</sup>C NMR (126 MHz, CDCl<sub>3</sub>) δ 171.2, 165.8, 163.8, 140.9, 134.9, 133.7, 133.6, 130.8, 128.6, 128.2, 127.8, 127.7, 127.5, 127.4, 127.0, 125.8, 124.9, 63.6, 38.7, 36.9, 25.9. IR (film)  $\nu_{\max}$  3391, 3057, 2977, 1660, 1517, 1265, 1175, 969, 827, 750, 730, 529 cm<sup>-1</sup>; HRMS (ESI): *m/z* for C<sub>29</sub>H<sub>28</sub>N<sub>2</sub>O<sub>3</sub> [M+H]<sup>+</sup> calcd.: 453.2173, found: 453.2166.

### (Z)-N-(5-benzylidene-3-(tert-butyl)-1-(4-fluorophenyl)-2,6-dioxopiperidin-3-yl)benzamide (3ba)

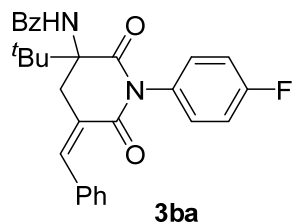

The title compound **3ba** was prepared according to the general procedure as described above in 84% yield (39.5 mg). It was purified by flash column chromatography (Petroleum ether : EtOAc = 5:1) to afford white solid. mp = 110 – 112 °C. <sup>1</sup>H NMR (500 MHz, CDCl<sub>3</sub>) δ 7.77 – 7.71 (m, 2H), 7.55 – 7.49 (m, 3H), 7.44 (t, *J* = 7.7 Hz, 2H), 7.35 – 7.28 (m, 3H), 7.22 (dd, *J* = 8.9, 4.9 Hz, 2H), 7.13 (t, *J* = 8.7 Hz, 2H), 7.05 (s, 1H), 6.74 (s, 1H), 3.70 (dd, *J* = 15.1, 2.4 Hz, 1H), 3.53 (d, *J* = 14.8 Hz, 1H), 1.33 (s, 9H). <sup>13</sup>C NMR (126 MHz, CDCl<sub>3</sub>) δ 172.1, 167.0, 165.0, 162.4 (d, *J* = 247.5 Hz), 141.9, 134.7, 134.5, 131.9, 130.3, 130.3, 129.6, 128.9, 128.8, 128.1, 126.9, 125.9, 116.3 (d, *J* = 22.7 Hz), 64.5, 39.4, 37.9. <sup>19</sup>F NMR (471 MHz, CDCl<sub>3</sub>) δ -114.43; IR (film)  $\nu_{\max}$  3391, 3057, 2965, 1661, 1507, 1265, 1175, 964, 827, 750, 731, 529 cm<sup>-1</sup>; HRMS (ESI): *m/z* for C<sub>29</sub>H<sub>27</sub>FN<sub>2</sub>O<sub>3</sub> [M+H]<sup>+</sup> calcd.: 471.2079, found: 471.2076.

**(Z)-N-(5-benzylidene-3-(tert-butyl)-1-(2-chlorophenyl)-2,6-dioxopiperidin-3-yl)benzamide (3ca)**

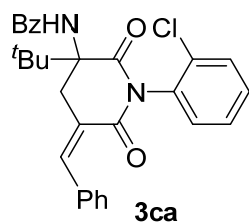

The title compound **3ca** was prepared according to the general procedure as described above in 52% yield (25.3 mg). It was purified by flash column chromatography (Petroleum ether : EtOAc = 5:1) to afford white solid. mp = 120 – 122 °C. <sup>1</sup>H NMR (500 MHz, CDCl<sub>3</sub>) δ 7.77 – 7.72 (m, 2H), 7.55 – 7.50 (m, 3H), 7.45 (t, *J* = 7.7 Hz, 2H), 7.36 – 7.29 (m, 3H), 7.23 (dd, *J* = 8.9, 4.9 Hz, 2H), 7.14 (t, *J* = 8.7 Hz, 2H), 7.06 (s, 1H), 6.75 (s, 1H), 3.71 (dd, *J* = 15.1, 2.4 Hz, 1H), 3.53 (d, *J* = 14.8 Hz, 1H), 1.33 (s, 9H). <sup>13</sup>C NMR (126 MHz, CDCl<sub>3</sub>) δ 170.9, 166.1, 163.9, 140.9, 133.7, 133.49, 133.46, 130.9, 129.0, 128.6, 128.5, 128.0, 127.8, 127.1, 125.9, 124.9, 63.4, 38.4, 37.0, 25.8. IR (film)  $\nu_{\max}$  3395, 3050, 2975, 1661, 1507, 1265, 1176, 964, 827, 750, 731, 530 cm<sup>-1</sup>; HRMS (ESI): *m/z* for C<sub>29</sub>H<sub>27</sub>ClN<sub>2</sub>O<sub>3</sub> [M+H]<sup>+</sup> calcd.: 487.1783, found: 487.1782.

**(Z)-N-(5-benzylidene-3-(tert-butyl)-1-(4-chlorophenyl)-2,6-dioxopiperidin-3-yl)benzamide (3da)**

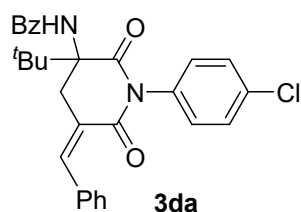

The title compound **3da** was prepared according to the general procedure as described above in 75% yield (36.5 mg). It was purified by flash column chromatography (Petroleum ether : EtOAc = 5:1) to afford white solid. mp = 187 – 189 °C. <sup>1</sup>H NMR (500 MHz, CDCl<sub>3</sub>) δ 7.73 (d, *J* = 7.0 Hz, 2H), 7.52 (m, 3H), 7.47 – 7.39 (m, 4H), 7.35 – 7.27 (m, 3H), 7.19 (d, *J* = 8.6 Hz, 2H), 7.05 (s, 1H), 6.72 (s, 1H), 3.69 (dd, *J* = 15.1, 2.3 Hz, 1H), 3.50 (d, *J* = 15.9 Hz, 1H), 1.32 (s, 9H). <sup>13</sup>C NMR (126 MHz, CDCl<sub>3</sub>) δ 171.9, 167.1, 164.9, 141.9, 134.7, 134.5, 134.4, 131.9, 130.0, 129.6, 129.5, 128.9, 128.8, 128.1, 126.9, 125.9, 64.4, 39.4, 38.0, 26.8. IR (film)  $\nu_{\max}$  3392, 3056, 2966, 1663, 1489, 1264, 1175, 964, 765, 750, 746, 731 cm<sup>-1</sup>; HRMS (ESI): *m/z* for C<sub>29</sub>H<sub>27</sub>ClN<sub>2</sub>O<sub>3</sub> [M+H]<sup>+</sup> calcd.: 487.1783, found: 487.1785.



**(Z)-N-(5-benzylidene-1-(4-bromophenyl)-3-(tert-butyl)-2,6-dioxopiperidin-3-yl)benzamide (3ea)**

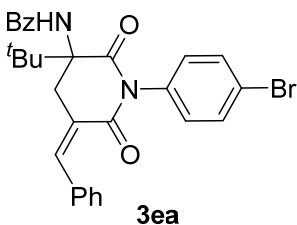

The title compound **3ea** was prepared according to the general procedure as described above in 70% yield (37.1 mg). It was purified by flash column chromatography (Petroleum ether : EtOAc = 5:1) to afford white solid. mp = 139 – 141 °C. <sup>1</sup>H NMR (500 MHz, CDCl<sub>3</sub>) δ 7.75 – 7.71 (m, 2H), 7.57 (d, *J* = 8.7 Hz, 2H), 7.54 – 7.50 (m, 3H), 7.44 (t, *J* = 7.7 Hz, 2H), 7.30 (dd, *J* = 9.9, 7.1 Hz, 3H), 7.13 (d, *J* = 8.5 Hz, 2H), 7.05 (s, 1H), 6.72 (s, 1H), 3.69 (dd, *J* = 15.1, 2.4 Hz, 1H), 3.50 (d, *J* = 15.2 Hz, 1H), 1.32 (s, 9H). <sup>13</sup>C NMR (126 MHz, CDCl<sub>3</sub>) δ 171.8, 167.1, 164.8, 141.9, 135.0, 134.7, 134.4, 132.5, 131.9, 130.3, 129.6, 128.9, 128.8, 128.1, 126.9, 125.9, 122.6, 64.4, 39.4, 38.0, 26.8. IR (film)  $\nu_{\max}$  3307, 2981, 1742, 1488, 1251, 1153, 1072, 823, 765, 750, 735, 506 cm<sup>-1</sup>; HRMS (ESI): *m/z* for C<sub>29</sub>H<sub>27</sub>BrN<sub>2</sub>O<sub>3</sub> [M+H]<sup>+</sup> calcd.: 531.1278, found: 531.1276.

**(Z)-N-(5-benzylidene-3-(tert-butyl)-2,6-dioxo-1-(o-tolyl)piperidin-3-yl)benzamide (3fa)**

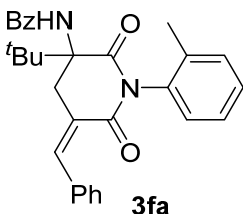

The title compound **3fa** was prepared according to the general procedure as described above in 79% yield (36.8 mg). It was purified by flash column chromatography (Petroleum ether : EtOAc = 5:1) to afford white solid. mp = 200 – 202 °C. <sup>1</sup>H NMR (500 MHz, CDCl<sub>3</sub>) δ 7.78 – 7.74 (m, 2H), 7.56 (d, *J* = 6.5 Hz, 2H), 7.54 – 7.49 (m, 1H), 7.44 (t, *J* = 7.7 Hz, 1H), 7.33 – 7.27 (m, 4H), 7.11 (d, *J* = 8.3 Hz, 2H), 7.08 (s, 1H), 6.89 (s, 1H), 3.82 – 3.61 (m, 2H), 2.37 (s, 3H), 1.33 (s, 9H). <sup>13</sup>C NMR (126 MHz, CDCl<sub>3</sub>) δ 171.3, 165.8, 163.8, 140.9, 138.2, 134.7, 133.73, 133.68, 130.7, 128.7, 128.4, 128.1, 127.9, 127.8, 127.7, 127.0, 125.8, 124.9, 124.3, 63.7, 38.8, 36.9, 26.0, 20.3. IR (film)  $\nu_{\max}$  3370, 2962, 1656, 1510, 1486, 1464, 1176, 961, 758, 750, 746, 730 cm<sup>-1</sup>; HRMS (ESI): *m/z* for C<sub>30</sub>H<sub>29</sub>N<sub>2</sub>O<sub>3</sub> [M+H]<sup>+</sup> calcd.: 467.2329, found: 467.2322.

**(Z)-N-(5-benzylidene-3-(tert-butyl)-2,6-dioxo-1-(m-tolyl)piperidin-3-yl)benzamide (3ga)**

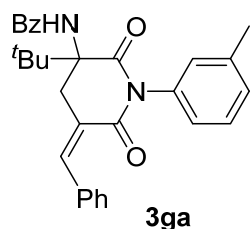

The title compound **3ga** was prepared according to the general procedure as described above in 78% yield (36.3 mg). It was purified by flash column chromatography (Petroleum ether : EtOAc = 5:1) to afford white solid. mp = 160 – 162 °C. <sup>1</sup>H NMR (500 MHz, CDCl<sub>3</sub>) δ 7.77 – 7.74 (m, 2H), 7.55 (d, *J* = 6.7 Hz, 2H), 7.53 – 7.49 (m, 1H), 7.43 (t, *J* = 7.6 Hz, 2H), 7.37 – 7.26 (m, 5H), 7.19 (d, *J* = 7.7 Hz, 1H), 7.08 (s, 1H), 7.02 (d, *J* = 6.9 Hz, 2H), 6.88 (s, 1H), 3.70 (t, *J* = 2.2 Hz, 2H), 2.37 (s, 3H), 1.33 (s, 9H). <sup>13</sup>C NMR (126 MHz, CDCl<sub>3</sub>) δ 171.3, 165.8, 163.8, 141.0, 138.2, 134.7, 133.74, 133.69, 130.8, 128.7, 128.5, 128.1, 127.9, 127.8, 127.7, 127.0, 125.9, 124.9, 124.3, 63.7, 38.8, 36.9, 26.0, 20.3. IR (film)  $\nu_{\max}$  3371, 2962, 1660, 1510, 1486, 1464, 1176, 961, 758, 750, 736 cm<sup>-1</sup>; HRMS (ESI): *m/z* for C<sub>30</sub>H<sub>29</sub>N<sub>2</sub>O<sub>3</sub> [M+H]<sup>+</sup> calcd.: 467.2329, found: 467.2326.

**(Z)-N-(5-benzylidene-3-(tert-butyl)-2,6-dioxo-1-(p-tolyl)piperidin-3-yl)benzamide (3ha)**

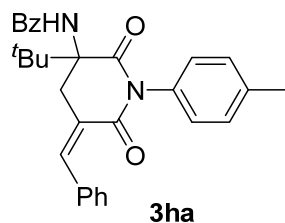

The title compound **3ha** was prepared according to the general procedure as described above in 80% yield (37.3 mg). It was purified by flash column chromatography (Petroleum ether : EtOAc=5:1) to afford white solid. mp = 161 – 163 °C. <sup>1</sup>H NMR (500 MHz, CDCl<sub>3</sub>) δ 7.77 – 7.73 (m, 2H), 7.55 (d, *J* = 6.5 Hz, 2H), 7.53 – 7.49 (m, 1H), 7.43 (t, *J* = 7.7 Hz, 2H), 7.33 – 7.26 (m, 4H), 7.10 (d, *J* = 8.3 Hz, 2H), 7.07 (s, 1H), 6.88 (s, 1H), 3.75 – 3.62 (m, 2H), 2.36 (s, 3H), 1.32 (s, 9H). <sup>13</sup>C NMR (126 MHz, CDCl<sub>3</sub>) δ 172.4, 166.8, 165.0, 141.9, 138.5, 134.8, 133.2, 131.8, 130.0, 129.8, 128.9, 128.8, 128.1, 128.0, 126.9, 126.0, 64.7, 39.9, 38.0, 27.0, 21.2. IR (film)  $\nu_{\max}$  3369, 2966, 1727, 1666, 1486, 1264, 1178, 963, 765, 757, 753, 751, 751, 750, 749, 746, 731 cm<sup>-1</sup>; HRMS (ESI): *m/z* for C<sub>30</sub>H<sub>29</sub>N<sub>2</sub>O<sub>3</sub> [M+H]<sup>+</sup> calcd.: 467.2329, found: 467.2322.

**(Z)-N-(5-benzylidene-3-(tert-butyl)-1-(4-methoxyphenyl)-2,6-dioxopiperidin-3-yl)benzamide**

**(3ia)**

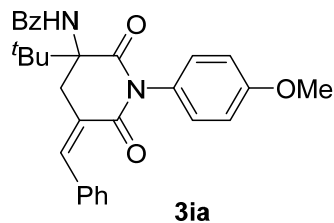

The title compound **3ia** was prepared according to the general procedure as described above in 76% yield (36.6 mg). It was purified by flash column chromatography (Petroleum ether : EtOAc = 5:1) to afford white solid. mp = 135 – 137 °C. <sup>1</sup>H NMR (500 MHz, CDCl<sub>3</sub>) δ 7.72 (d, J = 8.8 Hz, 2H), 7.55 (d, J = 6.7 Hz, 2H), 7.47 (t, J = 7.6 Hz, 2H), 7.39 (t, J = 7.5 Hz, 1H), 7.34 – 7.28 (m, 3H), 7.24 (d, J = 7.5 Hz, 2H), 7.07 (s, 1H), 6.93 (d, J = 8.8 Hz, 2H), 6.77 (s, 1H), 3.85 (s, 3H), 3.73 – 3.63 (m, 2H), 1.34 (s, 9H). <sup>13</sup>C NMR (126 MHz, CDCl<sub>3</sub>) δ 171.5, 165.8, 164.1, 158.4, 140.8, 133.74, 133.67, 130.8, 128.7, 128.3, 127.8, 127.7, 127.4, 127.0, 125.9, 125.0, 113.6, 63.6, 54.4, 38.7, 36.9, 25.9. IR (film) ν<sub>max</sub> 3392, 3056, 2964, 2838, 1663, 1509, 1246, 1177, 1030, 963, 825 cm<sup>-1</sup>; HRMS (ESI): m/z for C<sub>30</sub>H<sub>29</sub>N<sub>2</sub>O<sub>4</sub> [M+H]<sup>+</sup> calcd.: 483.2278, found: 483.2277.

**(Z)-N-(5-benzylidene-3-(tert-butyl)-1-(4-(tert-butyl)phenyl)-2,6-dioxopiperidin-3-yl)benzamide**

**(3ja)**

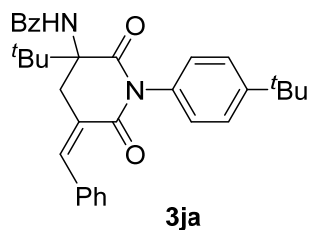

The title compound **3ja** was prepared according to the general procedure as described above in 92% yield (46.7 mg). It was purified by flash column chromatography (Petroleum ether : EtOAc = 5:1) to afford white solid. mp = 230 – 232 °C. <sup>1</sup>H NMR (500 MHz, CDCl<sub>3</sub>) δ 7.68 (d, J = 7.0 Hz, 2H), 7.45 (dd, J = 20.1, 7.2 Hz, 3H), 7.41 – 7.33 (m, 4H), 7.27 – 7.19 (m, 3H), 7.07 (d, J = 8.5 Hz, 2H), 7.01 (s, 1H), 6.83 (s, 1H), 3.68 – 3.60 (m, 2H), 1.26 (s, 9H), 1.24 (s, 9H). <sup>13</sup>C NMR (126 MHz, CDCl<sub>3</sub>) δ 172.6, 166.8, 164.9, 151.2, 142.0, 134.9, 134.7, 133.1, 131.8, 129.7, 128.8, 128.7, 128.04, 128.02, 127.7, 126.9, 126.4, 126.0, 64.7, 39.9, 37.9, 34.7, 31.4, 27.0. IR (film) ν<sub>max</sub> 3400, 3056, 2965, 1667, 1511, 1264, 1178, 963, 746, 563 cm<sup>-1</sup>; HRMS (ESI): m/z for C<sub>33</sub>H<sub>36</sub>N<sub>2</sub>O<sub>3</sub> [M+H]<sup>+</sup> calcd.: 509.2799, found: 509.2795.

**(Z)-N-(5-benzylidene-3-(tert-butyl)-1-(4-isopropylphenyl)-2,6-dioxopiperidin-3-yl)benzamide**

**(3ka)**

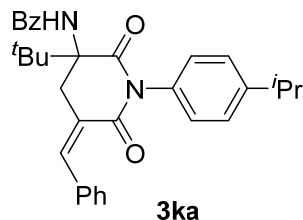

The title compound **3ka** was prepared according to the general procedure as described above in 95% yield (47.0 mg). It was purified by flash column chromatography (Petroleum ether : EtOAc = 5:1) to afford white solid. mp = 125 – 127 °C. <sup>1</sup>H NMR (500 MHz, CDCl<sub>3</sub>) δ 7.79 – 7.74 (m, 2H), 7.53 (dd, *J* = 20.3, 7.1 Hz, 3H), 7.44 (t, *J* = 7.7 Hz, 2H), 7.35 – 7.28 (m, 5H), 7.17 – 7.13 (m, 2H), 7.09 (s, 1H), 6.91 (s, 1H), 3.80 – 3.61 (m, 2H), 2.98 – 2.89 (m, 1H), 1.34 (s, 9H), 1.25 (d, *J* = 6.9 Hz, 6H). <sup>13</sup>C NMR (126 MHz, CDCl<sub>3</sub>) δ 172.6, 166.8, 164.9, 149.0, 142.0, 134.8, 134.7, 133.4, 131.8, 129.7, 128.8, 128.7, 128.1, 128.0, 127.4, 126.9, 126.0, 64.7, 39.9, 37.9, 33.9, 27.0, 23.93, 23.90. IR (film) ν<sub>max</sub> 3392, 3057, 2962, 1663, 1510, 1265, 1176, 963, 823, 765, 731 cm<sup>-1</sup>; HRMS (ESI): *m/z* for C<sub>32</sub>H<sub>34</sub>N<sub>2</sub>O<sub>3</sub> [M+H]<sup>+</sup> calcd.: 495.2642, found: 495.2639.

**N-(5-methylene-2,6-dioxo-3-phenyl-1-(p-tolyl)piperidin-3-yl)benzamide (3la)**

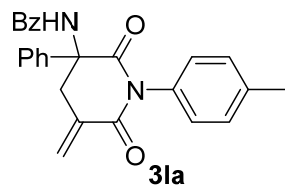

The title compound **3la** was prepared according to the general procedure as described above in 86% yield (35.3 mg). It was purified by flash column chromatography (Petroleum ether : EtOAc = 5:1) to afford semi-oil. <sup>1</sup>H NMR (500 MHz, CDCl<sub>3</sub>) δ 7.83 – 7.71 (m, 2H), 7.57 – 7.49 (m, 1H), 7.47 – 7.41 (m, 2H), 7.28 (d, *J* = 7.5 Hz, 2H), 7.10 (d, *J* = 8.3 Hz, 2H), 6.92 (s, 1H), 6.45 (dd, *J* = 2.9, 1.3 Hz, 1H), 5.75 (dd, *J* = 2.8, 1.3 Hz, 1H), 3.74 (d, *J* = 16.2 Hz, 1H), 3.62 (dt, *J* = 16.3, 2.9 Hz, 1H), 2.39 (s, 3H), 1.24 (s, 9H). <sup>13</sup>C NMR (126 MHz, CDCl<sub>3</sub>) δ 171.3, 165.8, 164.1, 137.5, 134.3, 133.6, 132.1, 130.8, 129.0, 127.7, 126.9, 125.8, 124.8, 63.4, 38.9, 32.6, 25.8, 20.2. IR (film) ν<sub>max</sub> 3390, 3061, 2962, 2924, 1728, 1684, 1511, 1403, 1364, 702, 570 cm<sup>-1</sup>. HRMS (ESI): *m/z* for C<sub>26</sub>H<sub>22</sub>N<sub>2</sub>O<sub>3</sub> [M+H]<sup>+</sup> calcd.: 404.1429, found: 404.1427.

### N-(1-(4-methoxyphenyl)-5-methylene-2,6-dioxo-3-phenylpiperidin-3-yl)benzamide (3ma)

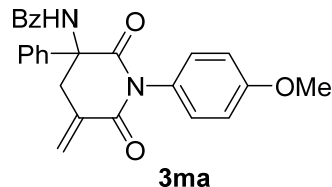

The title compound **3ma** was prepared according to the general procedure as described above in 81% yield (35.5 mg). It was purified by flash column chromatography (Petroleum ether : EtOAc = 5:1) to afford semi-oil. <sup>1</sup>H NMR (500 MHz, CDCl<sub>3</sub>) δ 7.75 (dd, *J* = 8.4, 1.3 Hz, 2H), 7.55 – 7.48 (m, 1H), 7.44 (t, *J* = 7.6 Hz, 1H), 7.13 (d, *J* = 8.8 Hz, 2H), 6.99 (d, *J* = 9.1 Hz, 2H), 6.90 (s, 1H), 6.44 (dd, *J* = 2.8, 1.3 Hz, 1H), 5.75 (dd, *J* = 2.6, 1.1 Hz, 1H), 3.82 (s, 3H), 3.70 (d, *J* = 16.2 Hz, 1H), 3.61 (dt, *J* = 16.2, 2.8 Hz, 1H), 1.24 (s, 9H). <sup>13</sup>C NMR (126 MHz, CDCl<sub>3</sub>) δ 171.4, 165.8, 164.2, 158.5, 134.3, 133.6, 130.8, 128.2, 127.7, 127.3, 125.8, 124.8, 113.6, 63.4, 54.4, 38.8, 32.6, 25.8. IR (film)  $\nu_{\max}$  3392, 3061, 2965, 2924, 1730, 1684, 1511, 1403, 1366, 1189, 801 cm<sup>-1</sup>. HRMS (ESI): *m/z* for C<sub>26</sub>H<sub>22</sub>N<sub>2</sub>O<sub>4</sub> [M+H]<sup>+</sup> calcd.: 404.1429, found: 404.1427.

### N-(1-(4-chlorophenyl)-5-methylene-2,6-dioxo-3-phenylpiperidin-3-yl)benzamide (3na)

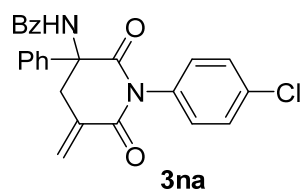

The title compound **3na** was prepared according to the general procedure as described above in 64% yield (27.5 mg). It was purified by flash column chromatography (Petroleum ether : EtOAc = 5:1) to afford semi-oil. <sup>1</sup>H NMR (500 MHz, CDCl<sub>3</sub>) δ 7.76 – 7.72 (m, 2H), 7.55 – 7.50 (m, 1H), 7.47 – 7.41 (m, 4H), 7.18 (d, *J* = 8.6 Hz, 2H), 6.44 (dd, *J* = 2.7, 1.2 Hz, 1H), 5.89 – 5.61 (m, 1H), 3.67 (dt, *J* = 16.2, 2.8 Hz, 1H), 3.53 (d, *J* = 16.2 Hz, 1H), 1.24 (s, 9H). <sup>13</sup>C NMR (126 MHz, CDCl<sub>3</sub>) δ 171.8, 167.1, 164.9, 135.2, 134.5, 134.4, 134.3, 132.0, 129.8, 129.5, 128.8, 126.9, 125.9, 64.2, 39.4, 33.6, 26.7. IR (film)  $\nu_{\max}$  3389, 3061, 2963, 2924, 1729, 1684, 1511, 1403, 1360, 1189, 801 cm<sup>-1</sup>; HRMS (ESI): *m/z* for C<sub>25</sub>H<sub>19</sub>ClN<sub>2</sub>O<sub>3</sub> [M+H]<sup>+</sup> calcd.: 404.1429, found: 404.1427.

### N-(1-(4-bromophenyl)-5-methylene-2,6-dioxo-3-phenylpiperidin-3-yl)benzamide (3oa)

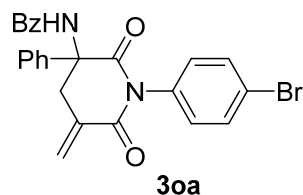

The title compound **3oa** was prepared according to the general procedure as described above in 56% yield (26.5 mg). It was purified by flash column chromatography (Petroleum ether : EtOAc = 5:1) to afford semi-oil.  $^1\text{H}$  NMR (500 MHz,  $\text{CDCl}_3$ )  $\delta$  7.76 – 7.71 (m, 2H), 7.60 (d,  $J$  = 8.7 Hz, 2H), 7.56 – 7.49 (m, 1H), 7.44 (t,  $J$  = 7.7 Hz, 1H), 7.12 (d,  $J$  = 8.6 Hz, 2H), 6.75 (s, 1H), 6.43 (dd,  $J$  = 2.7, 1.2 Hz, 1H), 5.75 – 5.73 (m, 1H), 3.67 (dt,  $J$  = 16.2, 2.9 Hz, 1H), 3.52 (d,  $J$  = 16.3 Hz, 1H), 1.24 (s, 9H).  $^{13}\text{C}$  NMR (126 MHz,  $\text{CDCl}_3$ )  $\delta$  171.7, 167.1, 164.9, 135.2, 134.9, 134.4, 132.5, 132.0, 130.2, 128.8, 126.9, 125.9, 122.6, 64.2, 39.4, 33.6, 26.7. IR (film)  $\nu_{\text{max}}$  3390, 3062, 2959, 2924, 1729, 1683, 1511, 1403, 1361, 1189, 801  $\text{cm}^{-1}$ . HRMS (ESI):  $m/z$  for  $\text{C}_{25}\text{H}_{19}\text{BrN}_2\text{O}_3$   $[\text{M}+\text{H}]^+$  calcd.: 404.1429, found: 404.1427.

### N-(5-methylene-2,6-dioxo-1,3-diphenylpiperidin-3-yl)benzamide (3pa)

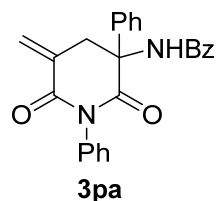

The title compound **3pa** was prepared according to the general procedure as described above in 92% yield (46.7 mg). It was purified by flash column chromatography (Petroleum ether : EtOAc = 5:1) to afford semi-oil.  $^1\text{H}$  NMR (500 MHz,  $\text{CDCl}_3$ )  $\delta$  7.77 – 7.73 (m, 2H), 7.54 – 7.46 (m, 3H), 7.46 – 7.39 (m, 3H), 7.22 (d,  $J$  = 7.2 Hz, 2H), 6.89 (s, 1H), 6.45 (dd,  $J$  = 2.5, 1.2 Hz, 1H), 5.76 (dd,  $J$  = 2.6, 1.3 Hz, 1H), 3.87 – 3.56 (m, 2H), 1.25 (s, 9H).  $^{13}\text{C}$  NMR (126 MHz,  $\text{CDCl}_3$ )  $\delta$  165.9, 164.0, 134.8, 134.3, 133.6, 130.8, 128.3, 127.7, 127.6, 127.2, 125.9, 124.8, 63.4, 32.6, 25.8. IR (film)  $\nu_{\text{max}}$  3391, 3063, 2961, 2924, 1729, 1683, 1511, 1486, 1272, 1189, 949, 801  $\text{cm}^{-1}$ ; HRMS (ESI):  $m/z$  for  $\text{C}_{25}\text{H}_{20}\text{N}_2\text{O}_3$   $[\text{M}+\text{H}]^+$  calcd.: 404.1429, found: 404.1427.

**(Z)-N-(3-(tert-butyl)-5-(2-nitrobenzylidene)-2,6-dioxo-1-phenylpiperidin-3-yl)benzamide (3qa)**

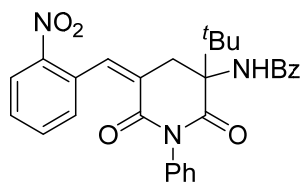

**3qa**

The title compound **3qa** was prepared according to the general procedure as described above in 65% yield (32.3 mg). It was purified by flash column chromatography (Petroleum ether : EtOAc = 5:1) to afford white solid. mp = 183 – 185 °C. <sup>1</sup>H NMR (500 MHz, CDCl<sub>3</sub>) δ 7.83 (d, *J* = 8.1 Hz, 2H), 7.67 (d, *J* = 8.2 Hz, 2H), 7.51 (d, *J* = 6.5 Hz, 2H), 7.44 (t, *J* = 7.7 Hz, 2H), 7.36 (t, *J* = 7.4 Hz, 1H), 7.32 – 7.26 (m, 3H), 7.19 (d, *J* = 7.4 Hz, 2H), 7.07 (s, 1H), 6.87 (s, 1H), 3.87 – 3.51 (m, 2H), 1.31 (s, 9H). <sup>13</sup>C NMR (126 MHz, CDCl<sub>3</sub>) δ 172.6, 166.8, 164.9, 151.2, 142.0, 134.9, 134.7, 133.1, 131.8, 129.7, 128.8, 128.7, 128.04, 128.02, 127.7, 126.9, 126.4, 126.0, 64.7, 39.9, 37.9, 34.7, 31.4, 27.0. IR (film)  $\nu_{\max}$  3323, 3064, 2926, 1681, 1596, 1517, 1343, 1181, 797, 752 cm<sup>-1</sup>; HRMS (ESI): *m/z* for C<sub>29</sub>H<sub>27</sub>N<sub>3</sub>O<sub>5</sub> [M+H]<sup>+</sup> calcd.: 498.2024, found: 498.2019.

**(Z)-N-(3-(tert-butyl)-5-(3-nitrobenzylidene)-2,6-dioxo-1-phenylpiperidin-3-yl)benzamide (3ra)**

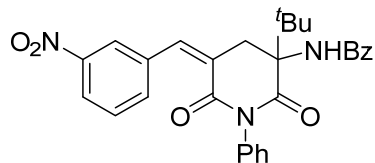

**3ra**

The title compound **3ra** was prepared according to the general procedure as described above in 81% yield (40.2 mg). It was purified by flash column chromatography (Petroleum ether : EtOAc = 5:1) to afford white solid. mp = 183 – 185 °C. <sup>1</sup>H NMR (500 MHz, CDCl<sub>3</sub>) δ 7.86 (d, *J* = 8.1 Hz, 2H), 7.71 (d, *J* = 8.2 Hz, 2H), 7.55 (d, *J* = 6.5 Hz, 2H), 7.48 (t, *J* = 7.7 Hz, 2H), 7.40 (t, *J* = 7.4 Hz, 1H), 7.36 – 7.29 (m, 3H), 7.22 (d, *J* = 7.4 Hz, 2H), 7.11 (s, 1H), 6.91 (s, 1H), 3.76 – 3.65 (m, 2H), 1.34 (s, 9H). <sup>13</sup>C NMR (126 MHz, CDCl<sub>3</sub>) δ 170.8, 166.0, 163.7, 140.9, 134.0, 133.6, 133.4, 131.4, 130.9, 129.3, 128.6, 127.9, 127.8, 127.0, 125.8, 124.8, 121.5, 63.4, 38.3, 36.9, 25.8. IR (film)  $\nu_{\max}$  3305, 3067, 2925, 1746, 1674, 1593, 1527, 1349, 1254, 1156, 1014, 758 cm<sup>-1</sup>; HRMS (ESI): *m/z* for C<sub>29</sub>H<sub>27</sub>N<sub>3</sub>O<sub>5</sub> [M+H]<sup>+</sup> calcd.: 498.2024, found: 498.2022.

**(Z)-N-(3-(tert-butyl)-5-(4-nitrobenzylidene)-2,6-dioxo-1-phenylpiperidin-3-yl)benzamide (3sa)**

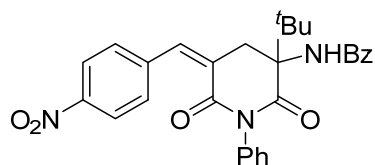

**3sa**

The title compound **3sa** was prepared according to the general procedure as described above in 94% yield (46.7 mg). It was purified by flash column chromatography (Petroleum ether : EtOAc = 5:1) to afford white solid. mp = 185 – 187 °C. <sup>1</sup>H NMR (500 MHz, CDCl<sub>3</sub>) δ 7.84 (d, *J* = 8.4 Hz, 2H), 7.74 (d, *J* = 8.4 Hz, 2H), 7.54 (d, *J* = 6.2 Hz, 2H), 7.47 (t, *J* = 7.6 Hz, 3H), 7.43 – 7.38 (m, 1H), 7.36 – 7.29 (m, 3H), 7.21 (d, *J* = 7.2 Hz, 2H), 7.11 (s, 1H), 6.91 (s, 1H), 3.80 – 3.60 (m, 2H), 1.33 (s, 9H). <sup>13</sup>C NMR (126 MHz, CDCl<sub>3</sub>) δ 172.0, 167.2, 165.0, 142.1, 134.9, 134.64, 134.60, 132.1, 130.2, 129.8, 129.7, 129.1, 129.0, 128.2, 127.1, 126.1, 64.6, 39.6, 38.1, 27.0. IR (film) ν<sub>max</sub> 3389, 3063, 2962, 1683, 1596, 1343, 1259, 1106, 963, 799 cm<sup>-1</sup>; HRMS (ESI): *m/z* for C<sub>29</sub>H<sub>27</sub>N<sub>3</sub>O<sub>5</sub> [M+H]<sup>+</sup> calcd.: 498.2024, found: 498.2020.

**(Z)-N-(3-(tert-butyl)-5-(4-fluorobenzylidene)-2,6-dioxo-1-phenylpiperidin-3-yl)benzamide (3ta)**

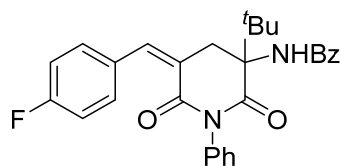

**3ta**

The title compound **3ta** was prepared according to the general procedure as described above in 85% yield (40.0 mg). It was purified by flash column chromatography (Petroleum ether : EtOAc = 5:1) to afford white solid. mp = 135 – 137 °C. <sup>1</sup>H NMR (500 MHz, CDCl<sub>3</sub>) δ 7.76 – 7.70 (m, 2H), 7.57 – 7.49 (m, 3H), 7.44 (t, *J* = 7.7 Hz, 2H), 7.34 – 7.28 (m, 3H), 7.24 – 7.20 (m, 2H), 7.13 (t, *J* = 8.7 Hz, 2H), 7.05 (s, 1H), 6.74 (s, 1H), 3.70 (dd, *J* = 15.1, 2.4 Hz, 1H), 3.53 (d, *J* = 14.8 Hz, 1H), 1.33 (s, 9H). <sup>13</sup>C NMR (126 MHz, CDCl<sub>3</sub>) δ 171.0, 166.0, 163.9, 161.3 (d, *J* = 247.5 Hz), 140.8, 133.6 (d, *J* = 30.5 Hz), 130.9, 129.3, 129.2, 128.5, 127.9, 127.7, 127.0, 125.8, 124.9, 115.2 (d, *J* = 22.7 Hz), 63.4, 38.4, 36.9, 25.8. <sup>19</sup>F NMR (471 MHz, CDCl<sub>3</sub>) δ -112.32. IR (film) ν<sub>max</sub> 3391, 3057, 2965, 1728, 1682, 1507, 1265, 964, 827, 758 cm<sup>-1</sup>; HRMS (ESI): *m/z* for C<sub>29</sub>H<sub>27</sub>FN<sub>2</sub>O<sub>3</sub> [M+H]<sup>+</sup> calcd.: 471.2079, found: 471.2062.



**(Z)-N-(3-(tert-butyl)-5-(4-chlorobenzylidene)-2,6-dioxo-1-phenylpiperidin-3-yl)benzamide (3ua)**

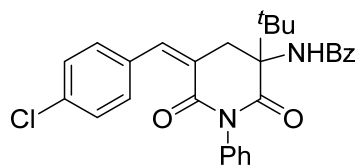

**3ua**

The title compound **3ua** was prepared according to the general procedure as described above in 81% yield (39.4 mg). It was purified by flash column chromatography (Petroleum ether : EtOAc = 5:1) to afford white solid. mp = 135 – 137 °C. <sup>1</sup>H NMR (500 MHz, CDCl<sub>3</sub>) δ 7.74 (d, *J* = 7.1 Hz, 2H), 7.52 – 7.42 (m, 7H), 7.39 (t, *J* = 7.5 Hz, 1H), 7.27 (d, *J* = 8.6 Hz, 2H), 7.22 (d, *J* = 7.4 Hz, 2H), 3.78 – 3.56 (m, 2H), 1.32 (s, 9H). <sup>13</sup>C NMR (126 MHz, CDCl<sub>3</sub>) δ 170.8, 166.0, 163.8, 140.9, 133.6, 133.4, 133.4, 130.9, 129.0, 128.5, 128.4, 127.9, 127.8, 127.0, 125.8, 124.8, 63.4, 38.3, 36.9, 25.8. IR (film)  $\nu_{\max}$  3341, 3055, 2965, 1726, 1677, 1488, 1264, 1185, 955, 764 cm<sup>-1</sup>; HRMS (ESI): *m/z* for C<sub>29</sub>H<sub>27</sub>ClN<sub>2</sub>O<sub>3</sub> [M+H]<sup>+</sup> calcd.: 487.1783, found: 487.1785.

**(Z)-N-(5-(4-bromobenzylidene)-3-(tert-butyl)-2,6-dioxo-1-phenylpiperidin-3-yl)benzamide (3va)**

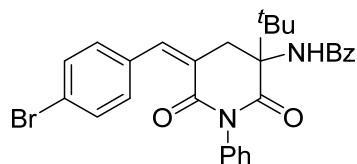

**3va**

The title compound **3va** was prepared according to the general procedure as described above in 80% yield (42.4 mg). It was purified by flash column chromatography (Petroleum ether : EtOAc = 5:1) to afford white solid. mp = 138 – 140 °C. <sup>1</sup>H NMR (500 MHz, CDCl<sub>3</sub>) δ 7.69 – 7.65 (m, 2H), 7.47 – 7.42 (m, 1H), 7.41 – 7.30 (m, 9H), 7.15 (dd, *J* = 7.3, 1.5 Hz, 2H), 6.89 (s, 1H), 6.73 (s, 1H), 3.67 – 3.22 (m, 2H), 1.25 (s, 9H). <sup>13</sup>C NMR (126 MHz, CDCl<sub>3</sub>) δ 171.0, 165.9, 163.9, 139.2, 134.8, 133.5, 132.7, 130.8, 130.2, 128.3, 127.74, 127.72, 127.6, 127.4, 125.9, 125.8, 122.0, 63.5, 38.7, 37.0, 25.8. IR (film)  $\nu_{\max}$  3391, 3055, 2966, 1729, 1683, 1663, 1485, 1264, 1176, 1011, 754 cm<sup>-1</sup>; HRMS (ESI): *m/z* for C<sub>29</sub>H<sub>27</sub>BrN<sub>2</sub>O<sub>3</sub> [M+H]<sup>+</sup> calcd.: 531.1278, found: 531.1281.

**(Z)-N-(3-(tert-butyl)-5-(3-methylbenzylidene)-2,6-dioxo-1-phenylpiperidin-3-yl)benzamide**

**(3wa)**

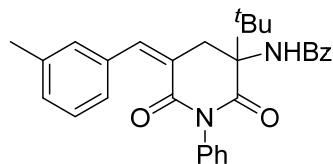

**3wa**

The title compound **3wa** was prepared according to the general procedure as described above in 92% yield (46.7 mg). It was purified by flash column chromatography (Petroleum ether : EtOAc = 5:1) to afford white solid. mp = 103 – 105 °C. <sup>1</sup>H NMR (500 MHz, CDCl<sub>3</sub>) δ 7.70 – 7.66 (m, 2H), 7.47 – 7.42 (m, 1H), 7.41 – 7.34 (m, 4H), 7.34 – 7.29 (m, 2H), 7.22 (s, 1H), 7.17 – 7.11 (m, 3H), 7.03 (d, *J* = 7.5 Hz, 1H), 6.99 (s, 1H), 6.79 (s, 1H), 3.78 – 3.46 (m, 2H), 2.26 (s, 3H), 1.26 (s, 9H). <sup>13</sup>C NMR (126 MHz, CDCl<sub>3</sub>) δ 171.3, 165.8, 163.8, 141.2, 136.5, 134.9, 133.7, 133.6, 130.8, 129.2, 128.6, 128.2, 127.7, 127.5, 127.4, 126.9, 125.9, 125.7, 124.7, 63.7, 38.8, 36.8, 26.0, 20.4. IR (film)  $\nu_{\max}$  3309, 2981, 2933, 1742, 1598, 1533, 1442, 1251, 1153, 1081, 792 cm<sup>-1</sup>; HRMS (ESI): *m/z* for C<sub>30</sub>H<sub>30</sub>N<sub>2</sub>O<sub>3</sub> [M+H]<sup>+</sup> calcd.: 467.2329, found: 467.2326.

**(Z)-N-(3-(tert-butyl)-5-(4-methylbenzylidene)-2,6-dioxo-1-phenylpiperidin-3-yl)benzamide (3xa)**

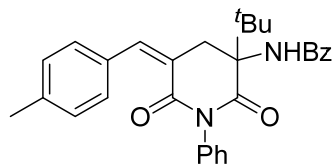

**3xa**

The title compound **3xa** was prepared according to the general procedure as described above in 74% yield (34.5 mg). It was purified by flash column chromatography (Petroleum ether : EtOAc = 5:1) to afford white solid. mp = 140 – 142 °C. <sup>1</sup>H NMR (500 MHz, CDCl<sub>3</sub>) δ 7.69 – 7.66 (m, 2H), 7.44 – 7.39 (m, 3H), 7.36 (dd, *J* = 15.0, 7.0 Hz, 4H), 7.31 (t, *J* = 7.5 Hz, 1H), 7.15 (d, *J* = 7.3 Hz, 2H), 7.05 (d, *J* = 8.0 Hz, 2H), 6.98 (s, 1H), 6.79 (s, 1H), 3.67 – 3.56 (m, 2H), 2.25 (s, 3H), 1.25 (s, 9H). <sup>13</sup>C NMR (126 MHz, CDCl<sub>3</sub>) δ 171.3, 165.8, 163.7, 141.2, 136.5, 134.9, 133.7, 133.6, 130.8, 129.2, 128.6, 128.2, 127.7, 127.5, 127.4, 126.9, 125.8, 125.7, 124.7, 63.6, 38.7, 36.8, 26.0, 20.4. IR (film)  $\nu_{\max}$  3310, 2983, 2933, 1742, 1598, 1535, 1442, 1251, 1153, 755 cm<sup>-1</sup>; HRMS (ESI): *m/z* for C<sub>30</sub>H<sub>30</sub>N<sub>2</sub>O<sub>3</sub> [M+H]<sup>+</sup> calcd.: 467.2329, found: 467.2329.

**(Z)-N-(3-(tert-butyl)-5-(3-methoxybenzylidene)-2,6-dioxo-1-phenylpiperidin-3-yl)benzamide  
(3ya)**

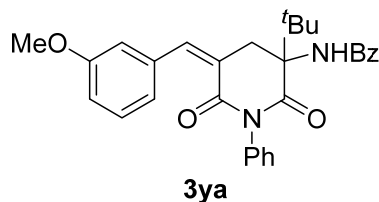

The title compound **3ya** was prepared according to the general procedure as described above in 94% yield (45.3 mg). It was purified by flash column chromatography (Petroleum ether : EtOAc = 5:1) to afford white solid. mp = 103 – 105 °C. <sup>1</sup>H NMR (500 MHz, CDCl<sub>3</sub>) δ 7.77 – 7.73 (m, 2H), 7.54 – 7.49 (m, 1H), 7.47 – 7.41 (m, 4H), 7.38 (t, *J* = 7.5 Hz, 1H), 7.23 (t, *J* = 7.8 Hz, 3H), 7.13 – 7.07 (m, 1H), 7.04 (s, 1H), 6.85 – 6.81 (m, 2H), 3.78 (s, 3H), 3.68 (dd, *J* = 15.1, 2.3 Hz, 1H), 3.64 (dd, *J* = 15.1, 1.2 Hz, 1H), 1.33 (s, 9H). <sup>13</sup>C NMR (126 MHz, CDCl<sub>3</sub>) δ 172.2, 166.9, 164.8, 159.2, 141.4, 136.2, 136.0, 134.6, 131.9, 129.3, 129.1, 128.8, 128.6, 128.5, 126.9, 126.5, 122.0, 115.0, 114.4, 64.7, 55.3, 39.7, 37.9, 26.9. IR (film) ν<sub>max</sub> 3369, 3059, 2962, 1729, 1682, 1578, 1373, 1264, 1175, 906, 788 cm<sup>-1</sup>; HRMS (ESI): *m/z* for C<sub>30</sub>H<sub>30</sub>N<sub>2</sub>O<sub>4</sub> [M+H]<sup>+</sup> calcd.: 483.2278, found: 483.2277.

**(Z)-N-(3-(tert-butyl)-5-(4-methoxybenzylidene)-2,6-dioxo-1-phenylpiperidin-3-yl)benzamide  
(3za)**

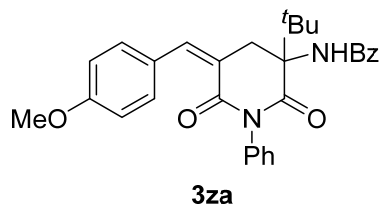

The title compound **3za** was prepared according to the general procedure as described above in 97% yield (46.7 mg). It was purified by flash column chromatography (Petroleum ether : EtOAc = 5:1) to afford white solid. mp = 105 – 107 °C. <sup>1</sup>H NMR (500 MHz, CDCl<sub>3</sub>) δ 7.77 – 7.73 (m, 2H), 7.54 – 7.49 (m, 1H), 7.48 – 7.42 (m, 4H), 7.41 – 7.36 (m, 1H), 7.24 (t, *J* = 7.8 Hz, 3H), 7.13 – 7.08 (m, 2H), 7.04 (s, 1H), 6.84 (d, *J* = 8.1 Hz, 2H), 3.78 (s, 3H), 3.69 (dd, *J* = 15.1, 2.3 Hz, 1H), 3.64 (dd, *J* = 15.1, 1.2 Hz, 1H), 1.34 (s, 9H). <sup>13</sup>C NMR (126 MHz, CDCl<sub>3</sub>) δ 172.2, 166.9, 164.8, 159.2, 141.4, 136.2, 136.0, 134.6, 131.8, 129.3, 129.1, 128.8, 128.52, 128.47, 126.9, 126.5, 122.0, 115.0, 114.4, 64.7, 55.3, 39.7, 37.9, 26.9. IR (film) ν<sub>max</sub> 3389, 3063, 2959, 1678, 1602, 1511, 1303, 1254, 1174, 1029, 760 cm<sup>-1</sup>; HRMS (ESI): *m/z* for C<sub>30</sub>H<sub>30</sub>N<sub>2</sub>O<sub>4</sub> [M+H]<sup>+</sup> calcd.: 483.2278, found: 483.2276.

**(Z)-N-(3-(tert-butyl)-5-(naphthalen-2-ylmethylene)-2,6-dioxo-1-phenylpiperidin-3-yl)benzamide (3z1a)**

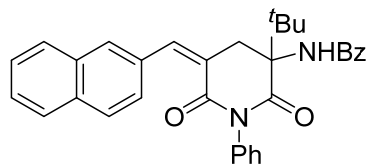

**3z1a**

The title compound **3z1a** was prepared according to the general procedure as described above in 71% yield (35.6 mg). It was purified by flash column chromatography (Petroleum ether : EtOAc = 5:1) to afford white solid. mp = 185 – 187 °C. <sup>1</sup>H NMR (500 MHz, CDCl<sub>3</sub>) δ 7.91 (s, 1H), 7.76 – 7.71 (m, 1H), 7.69 (td, *J* = 8.4, 4.3 Hz, 4H), 7.61 (dd, *J* = 8.6, 1.7 Hz, 1H), 7.44 (t, *J* = 7.4 Hz, 1H), 7.42 – 7.33 (m, 6H), 7.31 (t, *J* = 7.5 Hz, 1H), 7.19 (d, *J* = 1.5 Hz, 1H), 7.16 (d, *J* = 7.6 Hz, 2H), 6.79 (s, 1H), 3.72 – 3.58 (m, 2H), 1.28 (s, 9H). <sup>13</sup>C NMR (126 MHz, CDCl<sub>3</sub>) δ 171.3, 165.9, 163.9, 140.9, 134.9, 133.6, 132.3, 131.9, 131.4, 130.8, 128.7, 128.3, 127.7, 127.5, 127.5, 127.4, 126.6, 126.4, 125.93, 125.86, 125.7, 125.1, 63.6, 38.7, 37.0, 26.0. IR (film)  $\nu_{\text{max}}$  3399, 3060, 2962, 2840, 1728, 1681, 1651, 1606, 1346, 1028, 962 cm<sup>-1</sup>; HRMS (ESI): *m/z* for C<sub>33</sub>H<sub>30</sub>N<sub>2</sub>O<sub>3</sub> [M+H]<sup>+</sup> calcd.: 503.2329, found: 503.2328.

**(Z)-N-(3-(tert-butyl)-5-(furan-2-ylmethylene)-2,6-dioxo-1-phenylpiperidin-3-yl)benzamide (3z2a)**

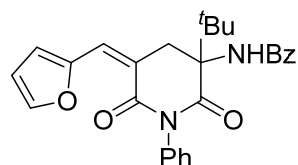

**3z2a**

The title compound **3z2a** was prepared according to the general procedure as described above in 69% yield (30.5 mg). It was purified by flash column chromatography (Petroleum ether : EtOAc = 5:1) to afford semi-oil. <sup>1</sup>H NMR (500 MHz, CDCl<sub>3</sub>) δ 7.80 – 7.76 (m, 2H), 7.65 – 7.61 (m, 2H), 7.54 – 7.38 (m, 7H), 7.24 (s, 1H), 6.96 (s, 1H), 6.81 (d, *J* = 3.5 Hz, 1H), 6.56 (dd, *J* = 3.6, 1.8 Hz, 1H), 4.51 (d, *J* = 17.4 Hz, 1H), 3.67 (dd, *J* = 17.4, 3.1 Hz, 1H), 1.23 (s, 9H). <sup>13</sup>C NMR (126 MHz, CDCl<sub>3</sub>) δ 171.9, 167.0, 166.2, 151.5, 145.3, 136.3, 134.8, 131.8, 129.3, 128.73, 128.72, 128.5, 128.4, 126.9, 125.3, 123.0, 117.7, 112.6, 64.5, 39.9, 29.6, 26.8. IR (film)  $\nu_{\text{max}}$  3390, 3063, 2962, 2840, 1728, 1681, 1651, 1624, 1346, 1173, 1028, 969 cm<sup>-1</sup>; HRMS (ESI): *m/z* for C<sub>27</sub>H<sub>26</sub>N<sub>2</sub>O<sub>4</sub> [M+H]<sup>+</sup> calcd.: 443.1965, found: 443.1963.

**(Z)-N-(5-benzylidene-3-(tert-butyl)-2,6-dioxo-1-phenylpiperidin-3-yl)-4-fluorobenzamide (3ab)**

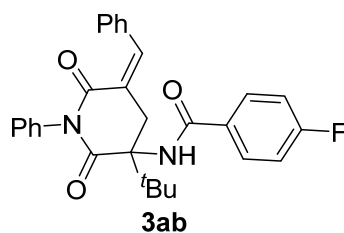

The title compound **3ab** was prepared according to the general procedure as described above in 85% yield (40.0 mg). It was purified by flash column chromatography (Petroleum ether : EtOAc = 5:1) to afford white solid. mp = 112 – 114 °C. <sup>1</sup>H NMR (500 MHz, CDCl<sub>3</sub>) δ 7.69 (dd, *J* = 8.8, 5.2 Hz, 2H), 7.47 (d, *J* = 6.5 Hz, 2H), 7.39 (t, *J* = 7.6 Hz, 2H), 7.31 (t, *J* = 7.4 Hz, 1H), 7.27 – 7.22 (m, 3H), 7.15 (d, *J* = 7.2 Hz, 2H), 7.08 – 7.00 (m, 3H), 6.73 (s, 1H), 3.62 (d, *J* = 1.7 Hz, 2H), 1.26 (s, 9H). <sup>13</sup>C NMR (126 MHz, CDCl<sub>3</sub>) δ 171.8, 166.8, 164.7, 162.4 (d, *J* = 247.5 Hz), 141.6, 134.5, 134.2, 131.7, 131.5, 131.5, 130.1, 130.0, 129.3, 128.7, 128.6, 127.8, 126.6, 125.7, 116.0 (d, *J* = 22.7 Hz), 64.2, 39.2, 37.7, 26.6. <sup>19</sup>F NMR (471 MHz, CDCl<sub>3</sub>) δ -113.99. IR (film) ν<sub>max</sub> 3367, 3060, 2962, 1728, 1655, 1523, 1491, 1374, 1177, 962, 733 cm<sup>-1</sup>; HRMS (ESI): m/z for C<sub>29</sub>H<sub>27</sub>FN<sub>2</sub>O<sub>3</sub> [M+H]<sup>+</sup> calcd.:471.2079, found: 471.2080.

**(Z)-N-(5-benzylidene-3-(tert-butyl)-2,6-dioxo-1-phenylpiperidin-3-yl)-4-chlorobenzamide (3ac)**

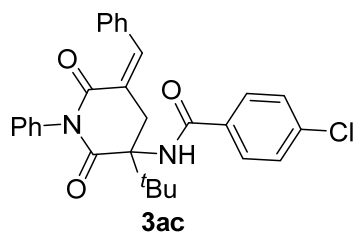

The title compound **3ac** was prepared according to the general procedure as described above in 86% yield (21.0 mg). It was purified by flash column chromatography (Petroleum ether : EtOAc = 5:1) to afford semi-oil. <sup>1</sup>H NMR (500 MHz, CDCl<sub>3</sub>) δ 8.15 (d, *J* = 8.9 Hz, 2H), 7.77 – 7.72 (m, 2H), 7.59 (d, *J* = 8.8 Hz, 2H), 7.52 (d, *J* = 7.5 Hz, 1H), 7.49 – 7.42 (m, 4H), 7.41 – 7.36 (m, 1H), 7.22 (d, *J* = 7.1 Hz, 2H), 7.04 (s, 1H), 6.76 (s, 1H), 3.61 (dd, *J* = 6.9, 1.8 Hz, 2H), 1.34 (s, 9H). <sup>13</sup>C NMR (126 MHz, CDCl<sub>3</sub>) δ 170.8, 166.0, 163.8, 140.9, 133.6, 133.42, 133.39, 130.9, 129.0, 128.5, 128.4, 127.9, 127.8, 127.0, 125.8, 124.8, 63.4, 38.3, 36.9, 25.8. IR (film) ν<sub>max</sub> 3366, 3065, 2962, 1728, 1650, 1523, 1491, 1374, 1346, 1177, 962, 848, 755 cm<sup>-1</sup>; HRMS (ESI): m/z for C<sub>29</sub>H<sub>27</sub>ClN<sub>2</sub>O<sub>3</sub> [M+H]<sup>+</sup> calcd.: 487.1783, found: 487.1768.

**(Z)-N-(5-benzylidene-3-(tert-butyl)-2,6-dioxo-1-phenylpiperidin-3-yl)-4-bromobenzamide (3ad)**

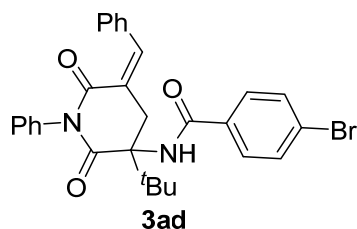

The title compound **3ad** was prepared according to the general procedure as described above in 72% yield (38.2 mg). It was purified by flash column chromatography (Petroleum ether : EtOAc = 5:1) to afford white solid. mp = 225 – 227 °C. <sup>1</sup>H NMR (500 MHz, CDCl<sub>3</sub>) δ 7.61 (d, *J* = 8.6 Hz, 2H), 7.59 – 7.52 (m, 4H), 7.46 (t, *J* = 7.7 Hz, 2H), 7.39 (t, *J* = 7.5 Hz, 1H), 7.34 – 7.28 (m, 3H), 7.21 (d, *J* = 7.1 Hz, 2H), 7.08 (s, 1H), 6.82 (s, 1H), 3.68 (s, 2H), 1.32 (s, 9H). <sup>13</sup>C NMR (126 MHz, CDCl<sub>3</sub>) δ 172.3, 165.9, 164.8, 142.2, 135.8, 134.7, 133.5, 132.0, 129.7, 129.3, 129.0, 128.6, 128.5, 128.4, 128.1, 126.5, 125.8, 64.8, 39.8, 37.8, 27.0. IR (film)  $\nu_{\max}$  3337, 3056, 2963, 2923, 1726, 1655, 1590, 1480, 1375, 1174, 1070, 840 cm<sup>-1</sup>; HRMS (ESI): *m/z* for C<sub>29</sub>H<sub>27</sub>BrN<sub>2</sub>O<sub>3</sub> [M+H]<sup>+</sup> calcd.: 531.1278, found: 531.1276.

**(Z)-N-(5-benzylidene-3-(tert-butyl)-2,6-dioxo-1-phenylpiperidin-3-yl)-4-(trifluoromethyl)benzamide (3ae)**

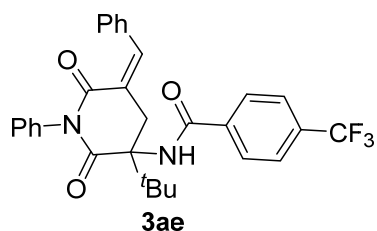

The title compound **3ae** was prepared according to the general procedure as described above in 64% yield (33.3 mg). It was purified by flash column chromatography (Petroleum ether : EtOAc = 5:1) to afford white solid. mp = 247 – 249 °C. <sup>1</sup>H NMR (500 MHz, CDCl<sub>3</sub>) δ 7.78 (d, *J* = 8.1 Hz, 2H), 7.63 (d, *J* = 8.2 Hz, 2H), 7.47 (d, *J* = 6.5 Hz, 2H), 7.39 (t, *J* = 7.7 Hz, 2H), 7.32 (t, *J* = 7.4 Hz, 1H), 7.28 – 7.20 (m, 3H), 7.14 (d, *J* = 7.4 Hz, 2H), 7.03 (s, 1H), 6.83 (s, 1H), 3.86 – 3.51 (m, 2H), 1.26 (s, 9H). <sup>13</sup>C NMR (126 MHz, CDCl<sub>3</sub>) δ 171.2, 164.6, 163.7, 141.3, 136.9, 134.7, 133.6, 132.5 (d, *J* = 32.8 Hz), 128.6, 128.3, 127.8, 127.2, 126.4, 124.78 (d, *J* = 3.5 Hz), 124.6, 63.9, 38.8, 36.8, 25.9. <sup>19</sup>F NMR (471 MHz, CDCl<sub>3</sub>) δ -113.99. IR (film)  $\nu_{\max}$  3351, 3057, 2971, 1729, 1680, 1523, 1492, 1376, 1325, 1265, 1174, 1127, 1066, 854 cm<sup>-1</sup>; HRMS (ESI): *m/z* for C<sub>30</sub>H<sub>27</sub>F<sub>3</sub>N<sub>2</sub>O<sub>3</sub> [M+H]<sup>+</sup> calcd.: 521.2047, found: 521.2047.

**(Z)-N-(5-benzylidene-3-(tert-butyl)-2,6-dioxo-1-phenylpiperidin-3-yl)-4-cyanobenzamide (3af)**

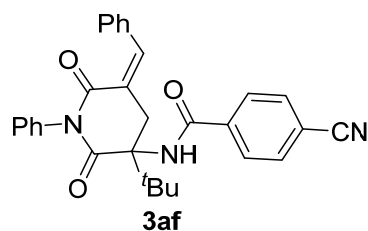

The title compound **3af** was prepared according to the general procedure as described above in 77% yield (35.3 mg). It was purified by flash column chromatography (Petroleum ether : EtOAc = 2:1) to afford white solid.  $^1\text{H}$  NMR (500 MHz,  $\text{CDCl}_3$ )  $\delta$  7.76 (d,  $J = 8.4$  Hz, 2H), 7.66 (d,  $J = 8.4$  Hz, 2H), 7.47 (d,  $J = 6.2$  Hz, 2H), 7.39 (t,  $J = 7.6$  Hz, 2H), 7.35 – 7.30 (m, 1H), 7.27 – 7.21 (m, 3H), 7.13 (d,  $J = 7.2$  Hz, 2H), 7.03 (s, 1H), 6.83 (s, 1H), 3.72 – 3.51 (m, 2H), 1.26 (s, 9H).  $^{13}\text{C}$  NMR (126 MHz,  $\text{CDCl}_3$ )  $\delta$  172.2, 165.1, 164.6, 142.5, 138.5, 135.7, 134.6, 132.6, 129.7, 129.4, 129.1, 128.7, 128.4, 128.1, 127.7, 125.5, 117.9, 115.4, 65.1, 39.9, 37.7, 27.0. IR (film)  $\nu_{\text{max}}$  3360, 3062, 2964, 2230, 1730, 1662, 1519, 1492, 1375, 1347, 1283, 734  $\text{cm}^{-1}$ . HRMS (ESI):  $m/z$  for  $\text{C}_{30}\text{H}_{27}\text{N}_3\text{O}_3$   $[\text{M}+\text{H}]^+$  calcd.: 478.2125, found: 478.2122.

**(Z)-N-(5-benzylidene-3-(tert-butyl)-2,6-dioxo-1-phenylpiperidin-3-yl)-3,5-dichlorobenzamide (3ag)**

**(3ag)**

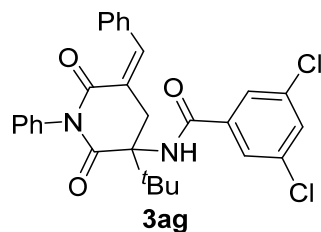

The title compound **3ag** was prepared according to the general procedure as described above in 55% yield (28.6 mg). It was purified by flash column chromatography (Petroleum ether : EtOAc = 5:1) to afford white solid. mp = 239 – 241  $^{\circ}\text{C}$ .  $^1\text{H}$  NMR (500 MHz,  $\text{CDCl}_3$ )  $\delta$  7.53 (d,  $J = 1.9$  Hz, 2H), 7.47 (d,  $J = 6.3$  Hz, 2H), 7.41 (dd,  $J = 14.3, 6.7$  Hz, 3H), 7.33 (t,  $J = 7.4$  Hz, 1H), 7.28 – 7.21 (m, 3H), 7.14 (d,  $J = 7.2$  Hz, 2H), 7.04 (s, 1H), 6.75 (s, 1H), 3.66 (d,  $J = 15.3$  Hz, 1H), 3.57 (dd,  $J = 15.3, 2.5$  Hz, 1H), 1.26 (s, 9H).  $^{13}\text{C}$  NMR (126 MHz,  $\text{CDCl}_3$ )  $\delta$  172.2, 164.6, 164.3, 142.6, 137.5, 135.7, 135.7, 134.6, 131.7, 129.7, 129.4, 129.0, 128.7, 128.4, 128.1, 125.6, 125.5, 65.0, 39.9, 37.7, 27.0. IR (film)  $\nu_{\text{max}}$  3360, 3063, 2962, 1731, 1659, 1567, 1493, 1255, 1177, 961, 858, 804, 753, 734  $\text{cm}^{-1}$ . HRMS (ESI):  $m/z$  for  $\text{C}_{29}\text{H}_{26}\text{Cl}_2\text{N}_2\text{O}_3$   $[\text{M}+\text{H}]^+$  calcd.: 521.1393, found: 521.1394.

**(Z)-N-(5-benzylidene-3-(tert-butyl)-2,6-dioxo-1-phenylpiperidin-3-yl)-2-methylbenzamide (3ah)**

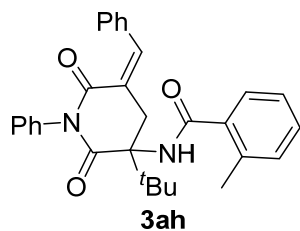

The title compound **3ah** was prepared according to the general procedure as described above in 61% yield (28.4 mg). It was purified by flash column chromatography (Petroleum ether : EtOAc = 5:1) to afford white solid.  $^1\text{H}$  NMR (500 MHz,  $\text{CDCl}_3$ )  $\delta$  7.55 (d,  $J = 7.3$  Hz, 2H), 7.45 (t,  $J = 7.7$  Hz, 2H), 7.39 – 7.35 (m, 2H), 7.34 – 7.27 (m, 4H), 7.25 – 7.19 (m, 4H), 7.05 (s, 1H), 6.30 (s, 1H), 3.79 (dd,  $J = 15.0, 2.3$  Hz, 1H), 3.46 (d,  $J = 16.1$  Hz, 1H), 2.43 (s, 3H), 1.31 (s, 9H).  $^{13}\text{C}$  NMR (126 MHz,  $\text{CDCl}_3$ )  $\delta$  171.3, 165.8, 163.8, 141.3, 140.8, 134.9, 133.8, 130.8, 128.6, 128.3, 128.2, 127.8, 127.5, 127.4, 127.0, 125.9, 125.0, 63.5, 38.7, 36.9, 25.9, 20.4. IR (film)  $\nu_{\text{max}}$  3339, 3058, 2963, 1730, 1655, 1491, 1374, 1264, 1176, 952, 731  $\text{cm}^{-1}$ . HRMS (ESI):  $m/z$  for  $\text{C}_{30}\text{H}_{30}\text{N}_2\text{O}_3$   $[\text{M}+\text{H}]^+$  calcd.: 467.2329, found: 467.2327.

**(Z)-N-(5-benzylidene-3-(tert-butyl)-2,6-dioxo-1-phenylpiperidin-3-yl)-3-methylbenzamide (3ai)**

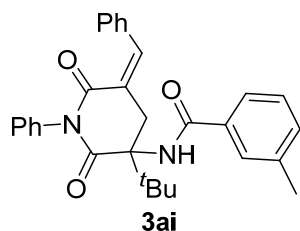

The title compound **3ai** was prepared according to the general procedure as described above in 90% yield (41.9 mg). It was purified by flash column chromatography (Petroleum ether: EtOAc = 5:1) to afford white solid. mp = 194 – 196  $^{\circ}\text{C}$ .  $^1\text{H}$  NMR (500 MHz,  $\text{CDCl}_3$ )  $\delta$  7.58 – 7.50 (m, 4H), 7.46 (t,  $J = 7.5$  Hz, 2H), 7.38 (t,  $J = 7.5$  Hz, 1H), 7.34 – 7.27 (m, 5H), 7.23 (d,  $J = 7.1$  Hz, 2H), 7.07 (s, 1H), 6.83 (s, 1H), 3.72 – 3.64 (m, 2H), 2.38 (s, 3H), 1.33 (s, 9H).  $^{13}\text{C}$  NMR (126 MHz,  $\text{CDCl}_3$ )  $\delta$  172.3, 167.1, 164.9, 141.9, 138.7, 136.0, 134.8, 134.7, 132.6, 129.7, 129.3, 128.9, 128.62, 128.55, 128.5, 128.1, 127.7, 126.0, 123.8, 64.6, 39.7, 38.0, 27.0, 21.4. IR (film)  $\nu_{\text{max}}$  3400, 3056, 2965, 1729, 1683, 1492, 1373, 1265, 1177, 962, 731  $\text{cm}^{-1}$ . HRMS (ESI):  $m/z$  for  $\text{C}_{30}\text{H}_{30}\text{N}_2\text{O}_3$   $[\text{M}+\text{H}]^+$  calcd.: 467.2329, found: 467.2331.



**(Z)-N-(5-benzylidene-3-(tert-butyl)-2,6-dioxo-1-phenylpiperidin-3-yl)-4-methylbenzamide (3aj)**

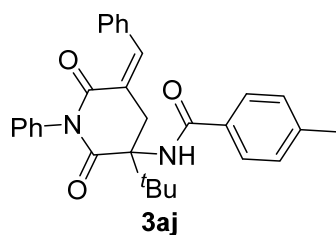

The title compound **3aj** was prepared according to the general procedure as described above in 92% yield (42.8 mg). It was purified by flash column chromatography (Petroleum ether : EtOAc = 5:1) to afford white solid. mp = 143 – 145 °C. <sup>1</sup>H NMR (500 MHz, CDCl<sub>3</sub>) δ 7.64 (d, *J* = 7.9 Hz, 2H), 7.54 (d, *J* = 7.5 Hz, 2H), 7.46 (t, *J* = 7.7 Hz, 2H), 7.40 – 7.36 (m, 1H), 7.33 – 7.27 (m, 3H), 7.23 (d, *J* = 8.0 Hz, 4H), 7.07 (s, 1H), 6.81 (s, 1H), 3.69 (dd, 2H), 2.39 (s, 3H), 1.33 (s, 9H). <sup>13</sup>C NMR (126 MHz, CDCl<sub>3</sub>) δ 172.4, 166.8, 164.9, 142.3, 141.9, 136.0, 134.8, 131.8, 129.7, 129.4, 129.3, 128.8, 128.53, 128.47, 128.0, 126.9, 126.1, 64.6, 39.7, 38.0, 27.0, 21.5. IR (film)  $\nu_{\max}$  3349, 3059, 2962, 1728, 1682, 1653, 1522, 1492, 1374, 1282, 1177, 962, 754 cm<sup>-1</sup>. HRMS (ESI): *m/z* for C<sub>30</sub>H<sub>30</sub>N<sub>2</sub>O<sub>3</sub> [M+H]<sup>+</sup> calcd.: 467.2329, found: 467.2332.

**(Z)-N-(5-benzylidene-3-(tert-butyl)-2,6-dioxo-1-phenylpiperidin-3-yl)-4-methoxybenzamide (3ak)**

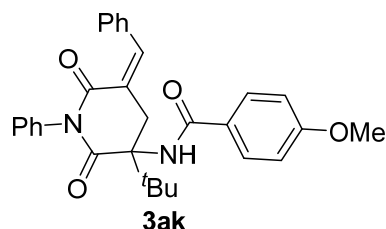

The title compound **3ak** was prepared according to the general procedure as described above in 96% yield (46.3 mg). It was purified by flash column chromatography (Petroleum ether : EtOAc = 5:1) to afford yellow solid. mp = 177 – 179 °C. <sup>1</sup>H NMR (500 MHz, CDCl<sub>3</sub>) δ 7.71 (d, *J* = 8.8 Hz, 2H), 7.54 (d, *J* = 6.7 Hz, 2H), 7.46 (t, *J* = 7.6 Hz, 2H), 7.38 (t, *J* = 7.5 Hz, 1H), 7.33 – 7.27 (m, 3H), 7.23 (d, *J* = 7.5 Hz, 2H), 7.06 (s, 1H), 6.92 (d, *J* = 8.8 Hz, 2H), 6.76 (s, 1H), 3.84 (s, 3H), 3.71 (dd, *J* = 15.2, 2.3 Hz, 1H), 3.65 (d, *J* = 15.4 Hz, 1H), 1.33 (s, 9H). <sup>13</sup>C NMR (126 MHz, CDCl<sub>3</sub>) δ 172.4, 166.4, 164.9, 162.4, 141.8, 136.0, 134.8, 129.67, 129.65, 129.3, 128.82, 128.75, 128.52, 128.47, 128.0, 126.9, 126.1, 113.9, 64.5, 55.5, 39.7, 38.0, 27.0. IR (film)  $\nu_{\max}$  3390, 3060, 2962, 2840, 1728, 1681, 1651, 1606, 1491, 1374, 1346, 1252, 1173, 1028, 962, 842 cm<sup>-1</sup>. HRMS (ESI): *m/z* for C<sub>30</sub>H<sub>30</sub>N<sub>2</sub>O<sub>4</sub> [M+H]<sup>+</sup> calcd.: 483.2278, found: 483.2274.

**(Z)-N-(5-benzylidene-3-(tert-butyl)-2,6-dioxo-1-phenylpiperidin-3-yl)-4-ethylbenzamide (3al)**

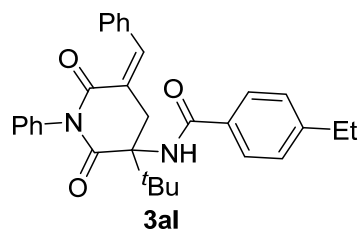

The title compound **3al** was prepared according to the general procedure as described above in 74% yield (35.5 mg). It was purified by flash column chromatography (Petroleum ether : EtOAc = 5:1) to afford white solid. mp = 185 – 187 °C. <sup>1</sup>H NMR (500 MHz, CDCl<sub>3</sub>) δ 7.60 (d, *J* = 8.3 Hz, 2H), 7.46 (d, *J* = 6.8 Hz, 2H), 7.41 – 7.37 (m, 2H), 7.31 (t, *J* = 7.5 Hz, 2H), 7.26 – 7.21 (m, 2H), 7.20 – 7.15 (m, 5H), 6.99 (s, 1H), 6.75 (s, 1H), 3.73 – 3.37 (m, 2H), 2.61 (q, *J* = 7.6 Hz, 2H), 1.25 (s, 9H), 1.17 (t, *J* = 7.6 Hz, 3H). <sup>13</sup>C NMR (126 MHz, CDCl<sub>3</sub>) δ 171.3, 165.8, 163.9, 147.5, 140.8, 134.9, 133.8, 131.0, 128.6, 128.2, 127.8, 127.5, 127.4, 127.2, 127.0, 126.0, 125.0, 63.5, 36.9, 27.8, 25.9, 14.3. IR (film) ν<sub>max</sub> 3391, 3028, 2964, 1729, 1683, 1655, 1522, 1492, 1374, 1177, 962, 849 cm<sup>-1</sup>. HRMS (ESI): *m/z* for C<sub>31</sub>H<sub>32</sub>N<sub>2</sub>O<sub>3</sub> [M+H]<sup>+</sup> calcd.: 481.2486, found: 481.2482.

**(Z)-N-(5-benzylidene-3-(tert-butyl)-2,6-dioxo-1-phenylpiperidin-3-yl)-2-naphthamide (3am)**

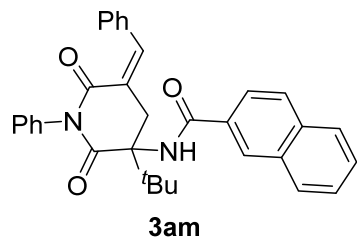

The title compound **3am** was prepared according to the general procedure as described above in 73% yield (36.6 mg). It was purified by flash column chromatography (Petroleum ether : EtOAc = 5:1) to afford white solid. mp = 195 – 197 °C. <sup>1</sup>H NMR (500 MHz, CDCl<sub>3</sub>) δ 8.21 (d, *J* = 11.0 Hz, 1H), 7.83 (dd, *J* = 19.2, 10.8 Hz, 3H), 7.73 (d, *J* = 6.5 Hz, 1H), 7.49 (d, *J* = 6.7 Hz, 4H), 7.41 (t, *J* = 7.9 Hz, 3H), 7.33 (d, *J* = 7.4 Hz, 1H), 7.24 (dd, *J* = 11.0, 8.2 Hz, 3H), 7.05 (s, 1H), 6.96 (s, 1H), 3.69 (s, 2H), 1.31 (s, 9H). <sup>13</sup>C NMR (126 MHz, CDCl<sub>3</sub>) δ 171.2, 165.9, 163.9, 140.9, 134.9, 133.6, 132.3, 131.8, 131.4, 130.8, 128.7, 128.2, 127.7, 127.51, 127.46, 127.4, 126.6, 126.4, 125.93, 125.85, 125.7, 125.1, 63.6, 38.7, 37.0, 25.9. IR (film) ν<sub>max</sub> 3367, 3059, 2959, 1729, 1682, 1497, 1374, 1290, 1179, 962, 778 cm<sup>-1</sup>. HRMS (ESI): *m/z* for C<sub>33</sub>H<sub>30</sub>N<sub>2</sub>O<sub>3</sub> [M+H]<sup>+</sup> calcd.: 503.2329, found: 503.2327.

**(Z)-N-(5-benzylidene-3-methyl-2,6-dioxo-1-phenylpiperidin-3-yl)benzamide (3an)**

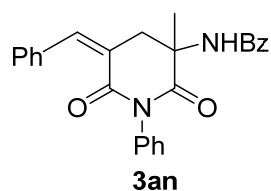

The title compound **3an** was prepared according to the general procedure as described above in 74% yield (30.4 mg). It was purified by flash column chromatography (Petroleum ether : EtOAc = 5:1) to afford white solid. mp = 211 – 213 °C. <sup>1</sup>H NMR (500 MHz, CDCl<sub>3</sub>) δ 8.09 (d, *J* = 2.7 Hz, 1H), 7.82 – 7.76 (m, 2H), 7.53 – 7.49 (m, 3H), 7.48 – 7.45 (m, 4H), 7.45 – 7.41 (m, 3H), 7.24 (d, *J* = 1.5 Hz, 1H), 7.22 (s, 1H), 7.17 (s, 1H), 4.13 (d, *J* = 15.3 Hz, 1H), 3.45 (dd, *J* = 15.3, 2.9 Hz, 1H), 1.74 (s, 3H). <sup>13</sup>C NMR (126 MHz, CDCl<sub>3</sub>) δ 174.4, 167.0, 166.0, 142.9, 135.6, 134.4, 134.2, 131.9, 130.0, 129.6, 129.4, 128.9, 128.8, 128.7, 128.3, 127.0, 125.1, 57.1, 33.4, 23.3. IR (film)  $\nu_{\text{max}}$  3350, 3057, 2926, 2854, 1732, 1678, 1523, 1488, 1447, 1349, 1263, 1193, 968 cm<sup>-1</sup>. HRMS (ESI): *m/z* for C<sub>26</sub>H<sub>22</sub>N<sub>2</sub>O<sub>3</sub> [M+H]<sup>+</sup> calcd.: 411.1703, found: 411.1701.

**(Z)-N-(5-benzylidene-3-ethyl-2,6-dioxo-1-phenylpiperidin-3-yl)benzamide (3ao)**

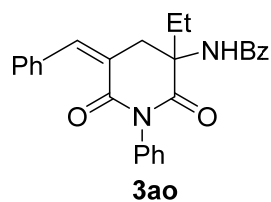

The title compound **3ao** was prepared according to the general procedure as described above in 64% yield (27.1 mg). It was purified by flash column chromatography (Petroleum ether : EtOAc = 5:1) to afford white solid. mp = 149 – 151 °C. <sup>1</sup>H NMR (500 MHz, CDCl<sub>3</sub>) δ 8.09 (d, *J* = 2.8 Hz, 1H), 7.81 (d, *J* = 7.5 Hz, 2H), 7.51 (dd, *J* = 13.8, 5.9 Hz, 5H), 7.48 – 7.41 (m, 6H), 7.36 (s, 1H), 7.20 (d, *J* = 8.2 Hz, 2H), 4.44 (dd, *J* = 15.6, 2.2 Hz, 1H), 3.32 (dd, *J* = 15.6, 3.0 Hz, 1H), 2.58 – 2.47 (m, 1H), 2.01 – 1.91 (m, 1H), 0.91 (t, *J* = 7.5 Hz, 3H). <sup>13</sup>C NMR (126 MHz, CDCl<sub>3</sub>) δ 165.7, 164.9, 142.0, 134.6, 133.34, 133.28, 130.9, 129.0, 128.7, 128.4, 127.9, 127.8, 127.7, 127.3, 125.9, 123.8, 120.0, 59.7, 31.7, 27.2, 7.2. IR (film)  $\nu_{\text{max}}$  3351, 3059, 2973, 1728, 1678, 1518, 1486, 1254, 1193, 1028, 957, 802 cm<sup>-1</sup>. HRMS (ESI): *m/z* for C<sub>27</sub>H<sub>24</sub>N<sub>2</sub>O<sub>3</sub> [M+H]<sup>+</sup> calcd.: 425.1860, found: 425.1858.

**(Z)-N-(5-benzylidene-3-isopropyl-2,6-dioxo-1-phenylpiperidin-3-yl)benzamide (3ap)**

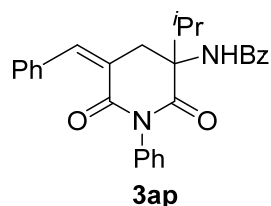

The title compound **3ap** was prepared according to the general procedure as described above in 69% yield (30.2 mg). It was purified by flash column chromatography (Petroleum ether : EtOAc = 5:1) to afford white solid. mp = 161 – 163 °C. <sup>1</sup>H NMR (500 MHz, CDCl<sub>3</sub>) δ 7.80 (d, *J* = 7.2 Hz, 2H), 7.59 (d, *J* = 6.2 Hz, 2H), 7.52 (d, *J* = 7.3 Hz, 1H), 7.49 – 7.40 (m, 5H), 7.32 (q, *J* = 8.5, 7.5 Hz, 3H), 7.21 – 7.16 (m, 3H), 7.00 (s, 1H), 3.92 (d, *J* = 14.8 Hz, 1H), 3.62 (dd, *J* = 14.9, 2.4 Hz, 1H), 2.51 (p, *J* = 6.8 Hz, 1H), 1.28 (d, *J* = 6.8 Hz, 3H), 1.14 (d, *J* = 6.9 Hz, 3H). <sup>13</sup>C NMR (126 MHz, CDCl<sub>3</sub>) δ 173.5, 167.3, 164.4, 144.0, 135.5, 134.7, 134.6, 131.8, 129.9, 129.4, 129.1, 128.72, 128.68, 128.4, 128.0, 127.0, 124.5, 63.2, 37.3, 34.5, 17.7, 17.3. IR (film)  $\nu_{\max}$  3351, 3060, 2968, 1730, 1682, 1598, 1580, 1515, 1487, 1285, 1241, 1199, 1073, 959, 735 cm<sup>-1</sup>. HRMS (ESI): *m/z* for C<sub>28</sub>H<sub>26</sub>N<sub>2</sub>O<sub>3</sub> [M+H]<sup>+</sup> calcd.: 439.2016, found: 439.2016.

**(Z)-N-(5-benzylidene-2,6-dioxo-1,3-diphenylpiperidin-3-yl)benzamide (3aq)**

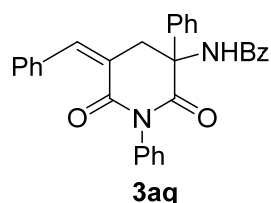

The title compound **3aq** was prepared according to the general procedure as described above in 58% yield (27.3 mg). It was purified by flash column chromatography (Petroleum ether: EtOAc = 5:1) to afford white solid. mp = 188 – 189 °C. <sup>1</sup>H NMR (500 MHz, CDCl<sub>3</sub>) δ 8.21 (s, 1H), 7.88 (s, 1H), 7.83 – 7.78 (m, 2H), 7.56 – 7.49 (m, 3H), 7.43 (t, *J* = 7.8 Hz, 3H), 7.37 – 7.32 (m, 5H), 7.34 – 7.28 (m, 4H), 7.13 (t, *J* = 7.4 Hz, 1H), 7.01 (d, *J* = 6.4 Hz, 1H), 5.80 (d, *J* = 6.3 Hz, 1H), 5.18 (d, *J* = 12.6 Hz, 1H), 5.08 (d, *J* = 12.5 Hz, 1H). <sup>13</sup>C NMR (126 MHz, CDCl<sub>3</sub>) δ 171.4, 167.0, 165.0, 143.4, 138.0, 135.6, 134.2, 133.3, 132.1, 129.6, 129.4, 129.3, 129.1, 128.9, 128.8, 128.7, 127.5, 127.2, 124.5, 120.4, 61.3, 57.6. IR (film)  $\nu_{\max}$  3367, 3059, 2959, 2925, 1729, 1682, 1497, 1348, 1290, 1179, 762 cm<sup>-1</sup>. HRMS (ESI): *m/z* for C<sub>31</sub>H<sub>24</sub>N<sub>2</sub>O<sub>3</sub> [M+H]<sup>+</sup> calcd.: 473.1860, found: 473.1861.

**(Z)-N-(1-benzoyl-4-benzylidene-2-(tert-butyl)-5-oxopyrrolidin-2-yl)benzamide (4aa)**

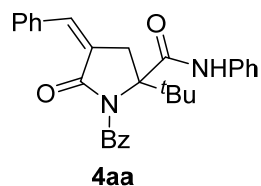

The title compound **4aa** was prepared according to the general procedure as described above in 75% yield (33.8 mg). It was purified by flash column chromatography (Petroleum ether: EtOAc = 10:1) to afford white solid. mp = 176 – 178 °C. <sup>1</sup>H NMR (500 MHz, CDCl<sub>3</sub>) δ 10.60 (s, 1H), 7.88 (dd, *J* = 8.4, 1.3 Hz, 2H), 7.74 (dd, *J* = 6.9, 2.9 Hz, 2H), 7.64 – 7.56 (m, 3H), 7.52 – 7.45 (m, 2H), 7.37 – 7.31 (m, 2H), 7.24 (d, *J* = 3.0 Hz, 2H), 7.11 (t, *J* = 7.4 Hz, 1H), 7.03 (d, *J* = 1.8 Hz, 1H), 3.78 (dd, *J* = 14.7, 1.2 Hz, 1H), 3.23 (dd, *J* = 14.8, 2.9 Hz, 1H), 1.24 (s, 9H). <sup>13</sup>C NMR (126 MHz, CDCl<sub>3</sub>) δ 178.3, 169.5, 168.3, 140.6, 138.0, 134.0, 133.63, 133.59, 130.9, 130.5, 129.6, 129.0, 128.7, 128.1, 126.1, 124.5, 120.5, 80.6, 40.2, 38.1, 27.6. IR (film) ν<sub>max</sub> 3057, 2929, 1782, 1656, 1492, 1474, 1265, 1090, 1006, 731 cm<sup>-1</sup>. HRMS (ESI): *m/z* for C<sub>29</sub>H<sub>28</sub>N<sub>2</sub>O<sub>3</sub> [M+H]<sup>+</sup> calcd.: 453.2173, found: 453.2171.

**(E)-7-benzylidene-3a-(tert-butyl)-2,5-diphenyl-7,7a-dihydrooxazolo[4,5-c]pyridine-4,6(3aH,5H)-dione (5aa)**

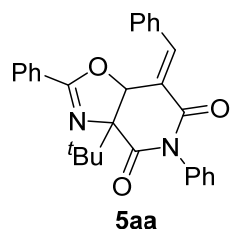

The title compound **5aa** was prepared according to the general procedure as described above in 42% yield (18.9 mg). It was purified by flash column chromatography (Petroleum ether : EtOAc = 15:1) to afford white solid. mp = 198 – 199 °C. <sup>1</sup>H NMR (500 MHz, CDCl<sub>3</sub>) δ 8.42 (s, 1H), 8.15 – 8.08 (m, 2H), 7.75 (dd, *J* = 6.6, 3.1 Hz, 2H), 7.60 – 7.52 (m, 4H), 7.50 – 7.45 (m, 4H), 7.41 (t, *J* = 7.4 Hz, 1H), 7.17 – 7.09 (m, 2H), 5.56 (s, 1H), 1.66 (s, 1H), 1.10 (s, 9H). <sup>13</sup>C NMR (126 MHz, CDCl<sub>3</sub>) δ 170.4, 164.5, 164.2, 149.4, 135.9, 133.4, 132.2, 131.0, 130.4, 129.3, 129.2, 128.8, 128.6, 128.5, 128.4, 126.9, 122.3, 81.2, 76.0, 37.0, 26.4. IR (film) ν<sub>max</sub> 3062, 2961, 2871, 1724, 1680, 1355, 1286, 1196, 970, 731 cm<sup>-1</sup>. HRMS (ESI): *m/z* for C<sub>29</sub>H<sub>26</sub>N<sub>2</sub>O<sub>3</sub> [M+H]<sup>+</sup> calcd.: 450.1943, found: 450.1944.





7.75  
7.74  
7.74  
7.54  
7.54  
7.53  
7.51  
7.46  
7.45  
7.43  
7.34  
7.33  
7.32  
7.31  
7.29  
7.24  
7.23  
7.22  
7.21  
7.16  
7.14  
7.13  
7.06  
6.75

3.73  
3.72  
3.69  
3.55  
3.52

1.33

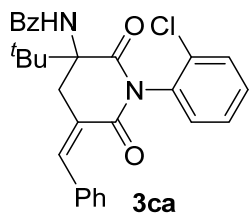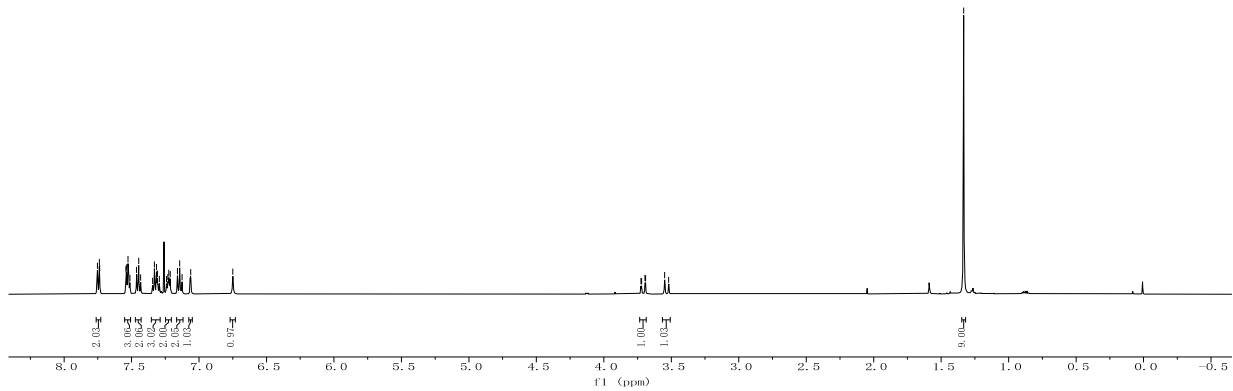

170.88  
166.08  
163.88

140.92  
133.70  
133.49  
133.46  
130.94  
129.02  
128.61  
128.51  
127.96  
127.82  
127.09  
125.91  
124.90

63.42

38.40  
36.96

25.82

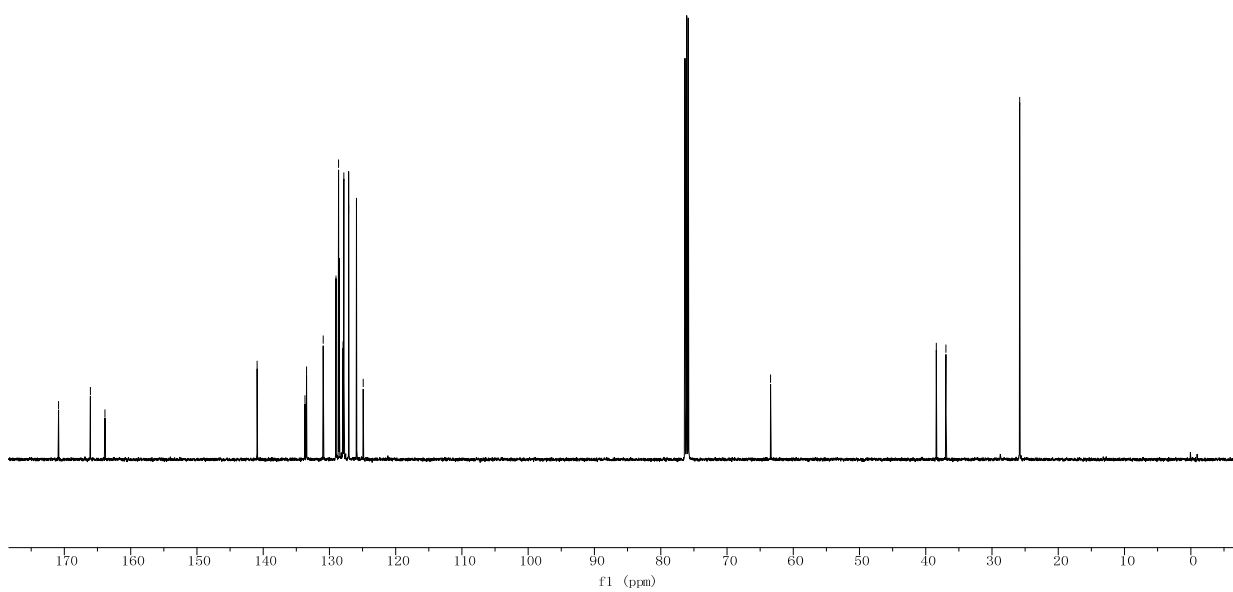



7.74  
7.73  
7.53  
7.53  
7.52  
7.50  
7.45  
7.44  
7.43  
7.42  
7.41  
7.33  
7.32  
7.31  
7.30  
7.29  
7.20  
7.18  
7.05  
6.72

3.71  
3.71  
3.68  
3.68  
3.52  
3.48

1.32

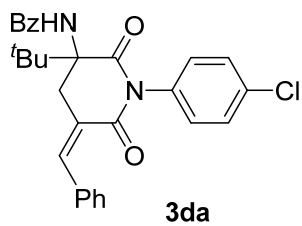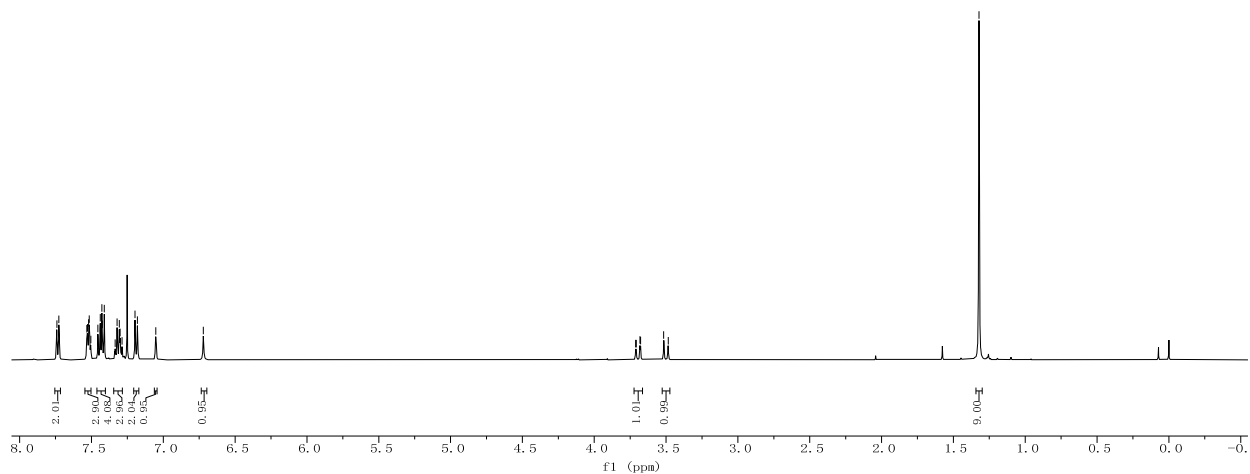

171.86  
167.06  
164.86

141.90  
134.69  
134.48  
134.44  
131.93  
130.00  
129.60  
129.49  
128.94  
128.81  
128.08  
126.89  
125.88

64.40

39.38  
37.95

26.81

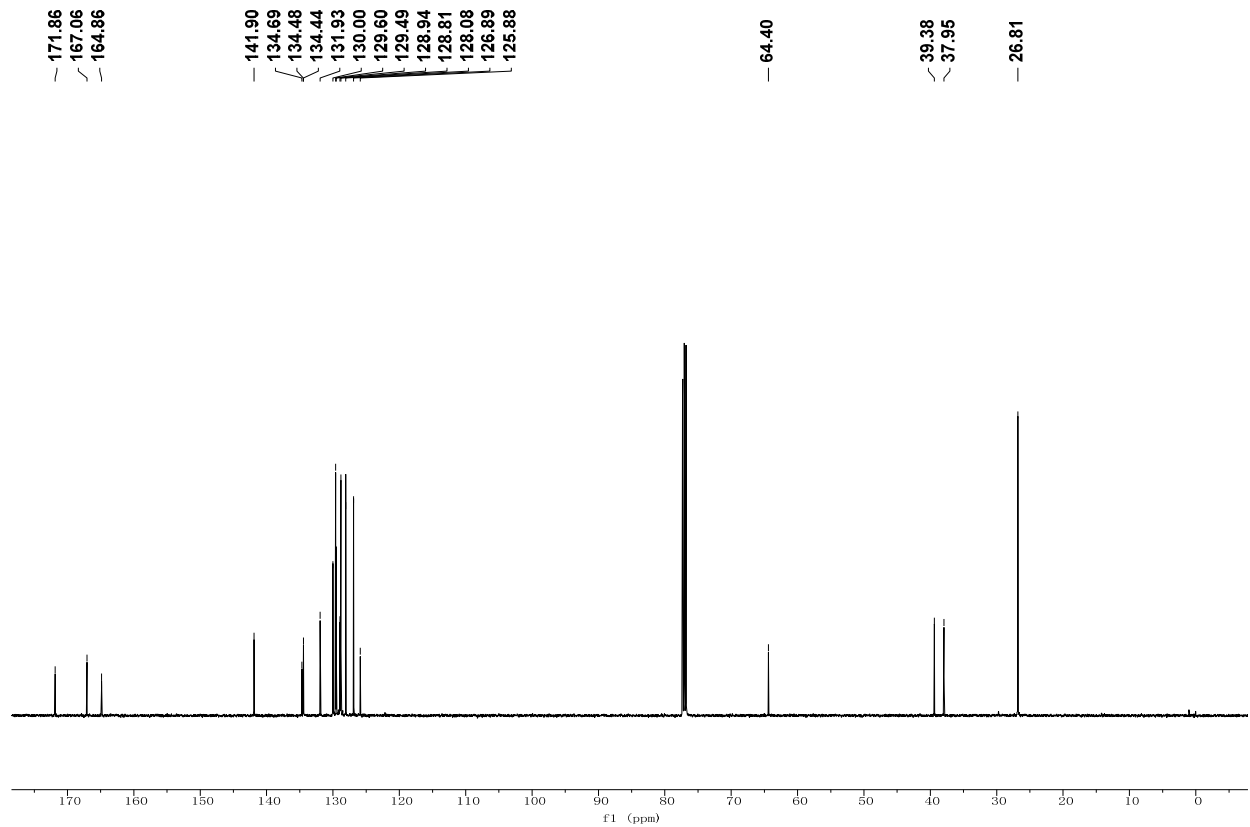

7.74  
7.73  
7.72  
7.58  
7.57  
7.53  
7.52  
7.51  
7.46  
7.44  
7.43  
7.34  
7.32  
7.31  
7.30  
7.29  
7.14  
7.12  
7.05  
6.72

3.71  
3.71  
3.68  
3.68  
3.52  
3.48

1.32

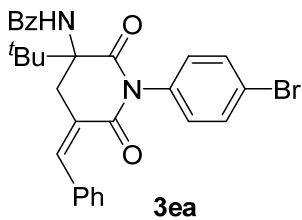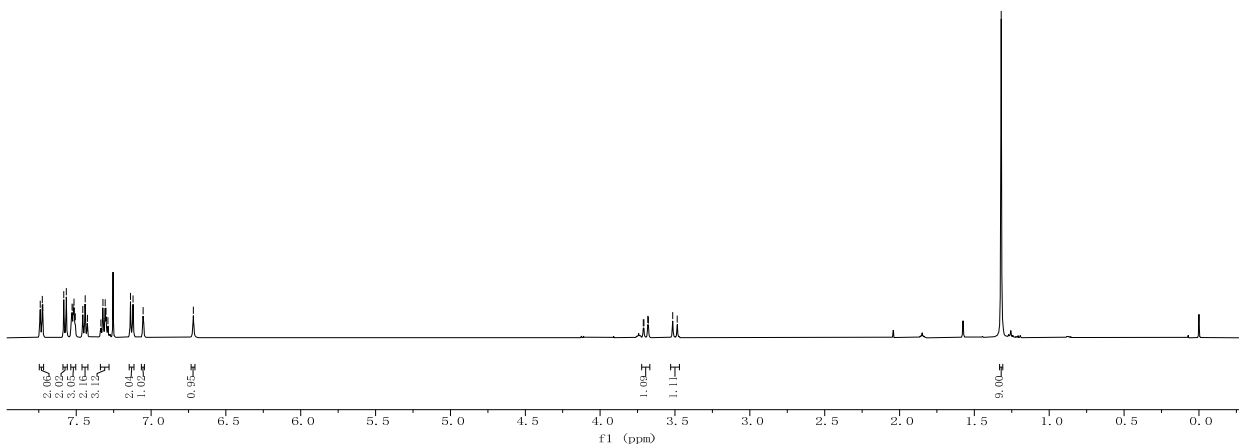

171.81  
167.05  
164.79

141.93  
135.02  
134.67  
134.44  
132.47  
131.92  
130.34  
129.60  
128.94  
128.81  
128.08  
126.88  
125.86  
122.58

64.40

39.39  
37.94

26.81

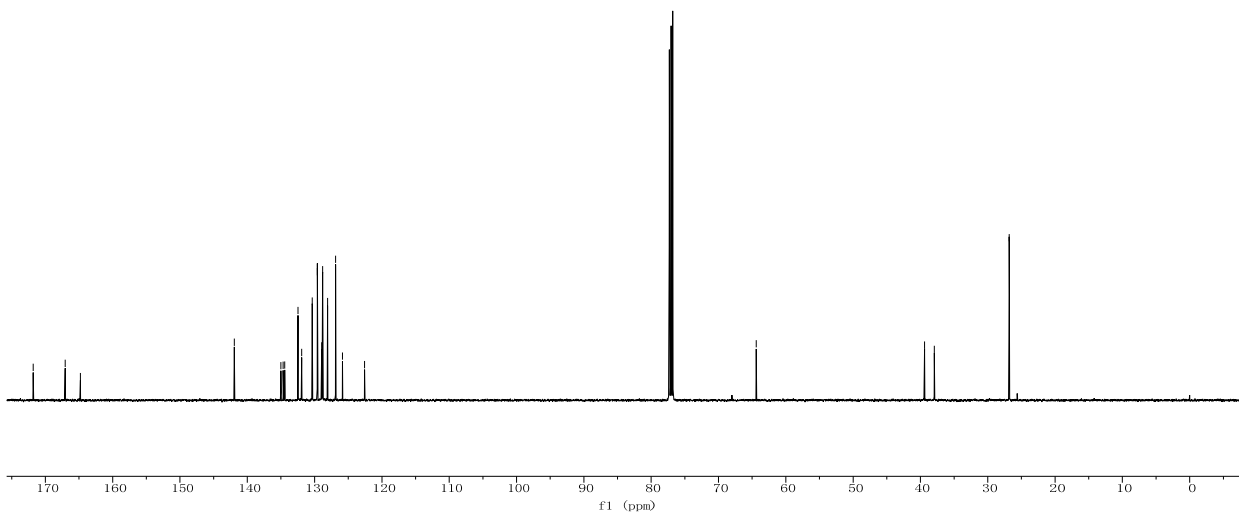

7.76  
7.75  
7.75  
7.57  
7.56  
7.53  
7.52  
7.51  
7.50  
7.50  
7.46  
7.44  
7.43  
7.32  
7.30  
7.30  
7.28  
7.28  
7.12  
7.11  
7.08  
6.89

3.74  
3.71  
3.70  
3.70  
3.67  
3.67

— 2.37

— 1.33

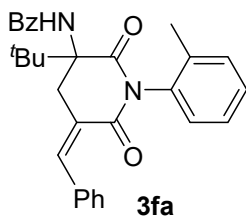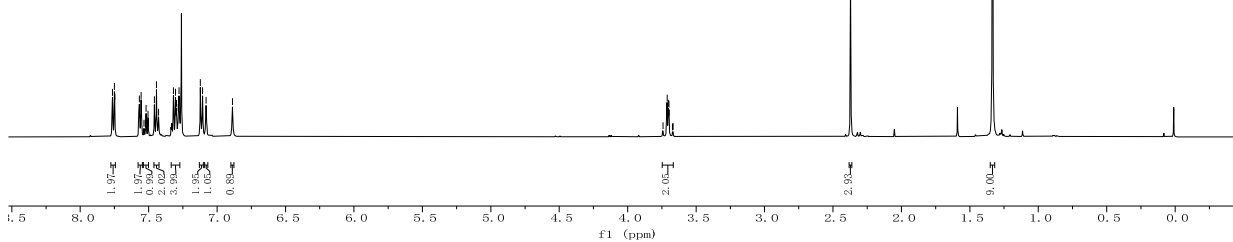

171.33  
165.79  
163.82  
140.93  
138.22  
134.72  
133.73  
133.68  
130.74  
128.66  
128.44  
128.06  
127.86  
127.80  
127.70  
126.97  
125.84  
124.90  
124.27

— 63.66

38.81  
36.89

— 25.96  
— 20.33

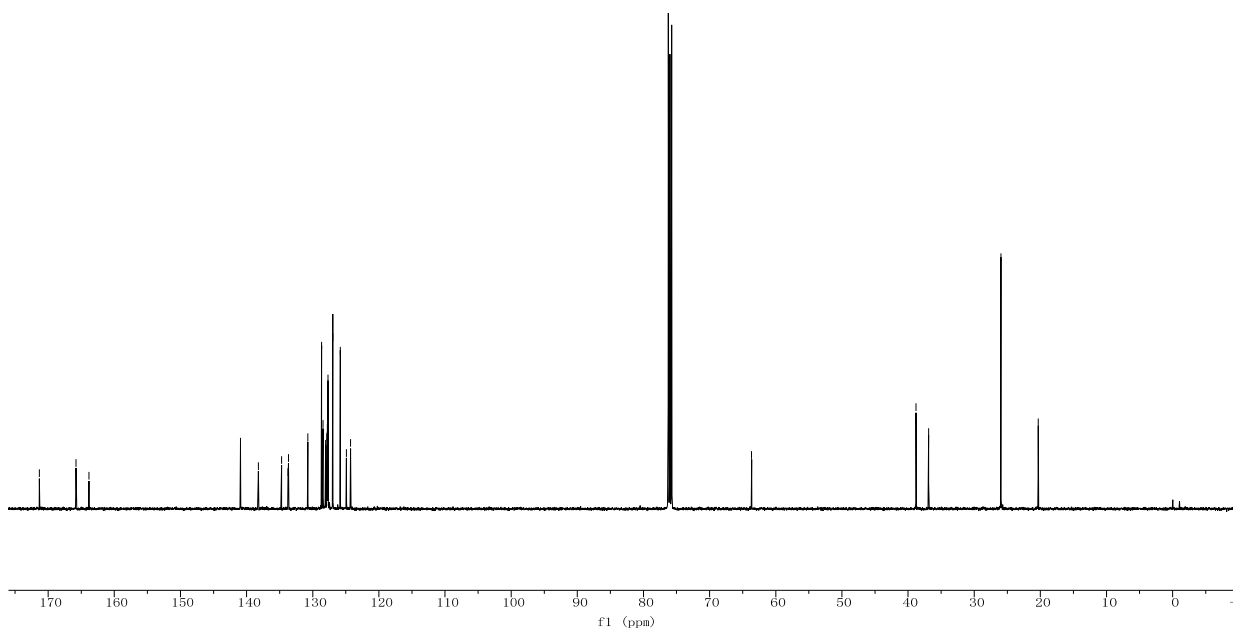



7.75  
7.74  
7.74  
7.56  
7.54  
7.52  
7.51  
7.50  
7.49  
7.49  
7.45  
7.43  
7.42  
7.31  
7.29  
7.29  
7.27  
7.27  
7.11  
7.10  
7.07  
6.88

3.73  
3.70  
3.69  
3.69  
3.66  
3.66

2.36

1.32

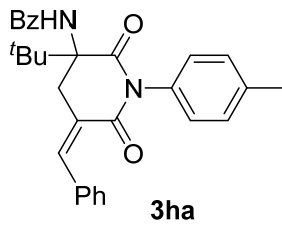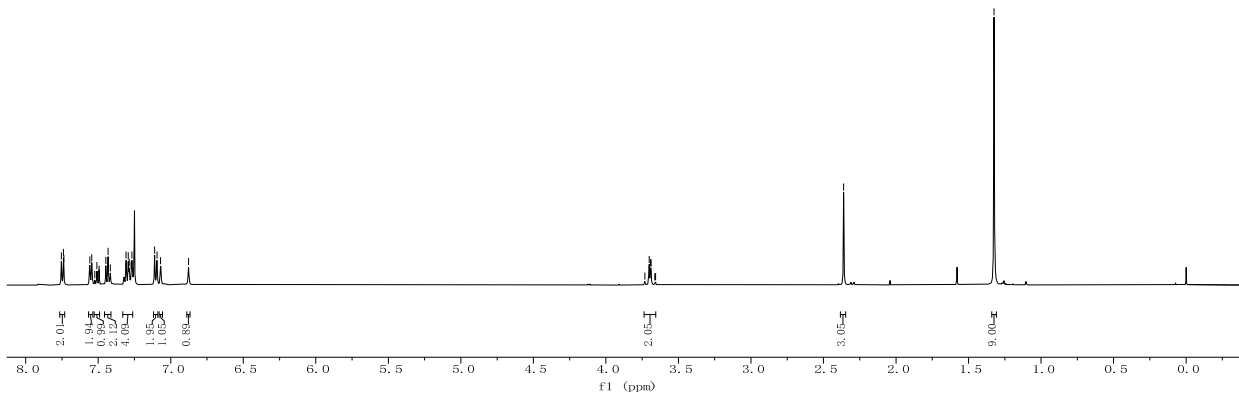

172.43  
166.84  
164.96

141.91  
138.48  
134.75  
133.17  
131.78  
130.02  
129.78  
128.86  
128.75  
128.09  
128.02  
126.89  
125.95

64.72

39.85  
37.96

27.00

21.24

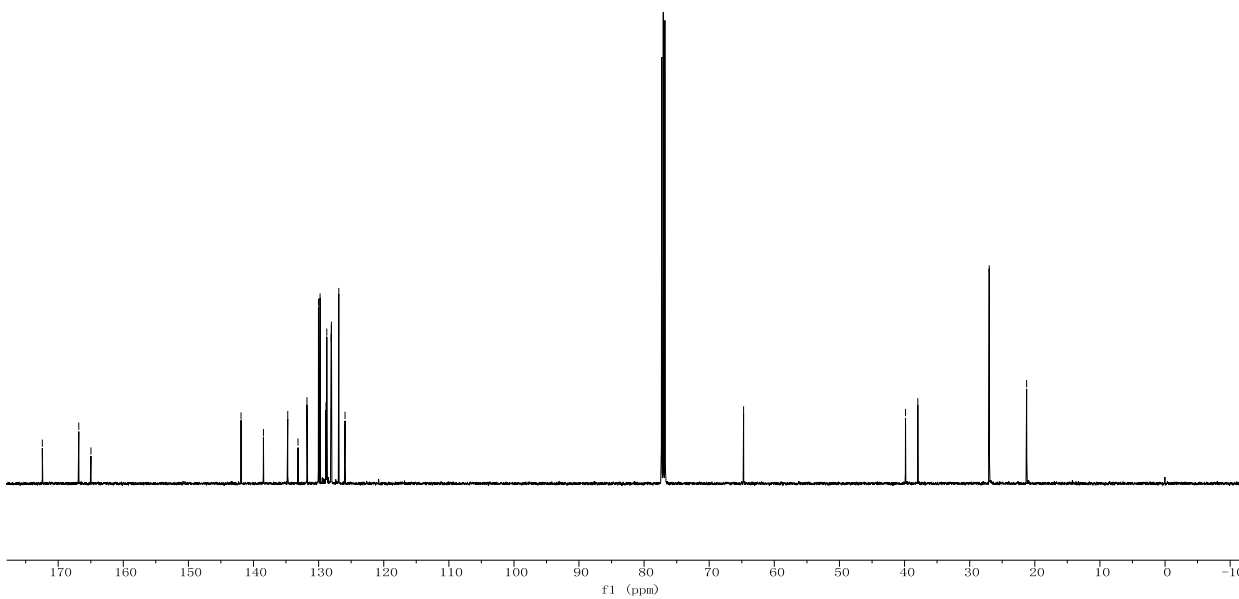

7.73  
7.71  
7.55  
7.54  
7.48  
7.47  
7.45  
7.40  
7.39  
7.37  
7.34  
7.33  
7.32  
7.31  
7.30  
7.29  
7.28  
7.25  
7.23  
7.07  
6.93  
6.92  
6.77

3.85  
3.73  
3.73  
3.70  
3.67  
3.64

1.34

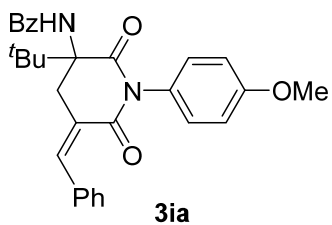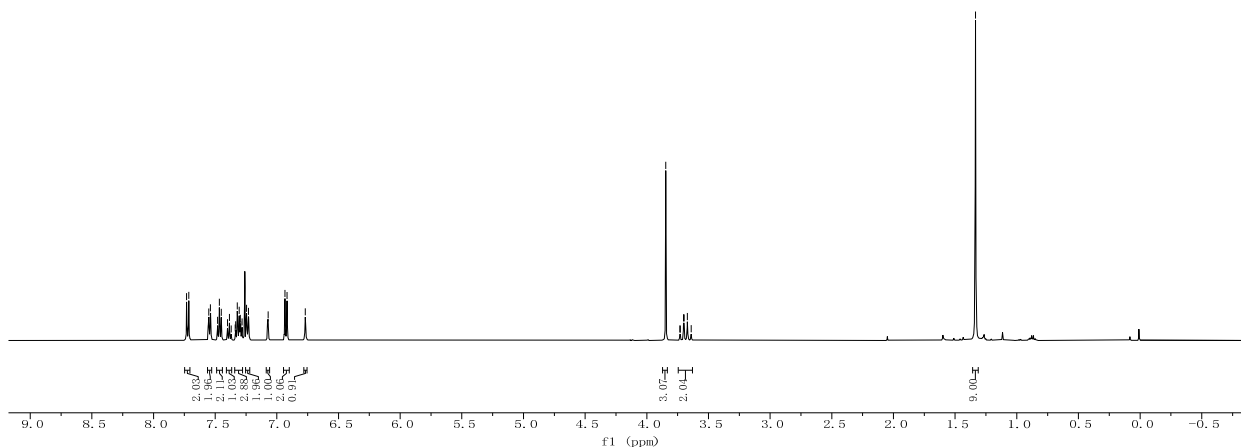

171.47  
165.81  
164.05  
158.42  
140.80  
133.74  
133.67  
130.75  
128.68  
128.34  
127.79  
127.71  
127.36  
126.98  
125.85  
124.95  
113.61

63.64

54.42

38.73

36.89

25.93

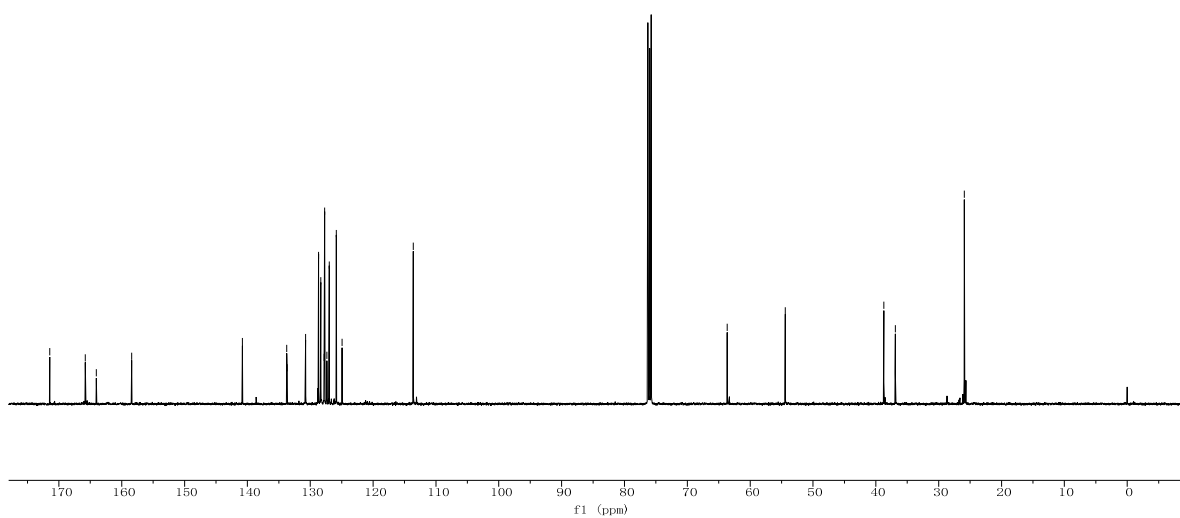

7.69  
7.67  
7.47  
7.46  
7.43  
7.42  
7.40  
7.38  
7.37  
7.36  
7.34  
7.25  
7.24  
7.23  
7.21  
7.20  
7.07  
7.06  
7.01  
6.83

3.67  
3.64  
3.61  
3.61

1.26  
1.24

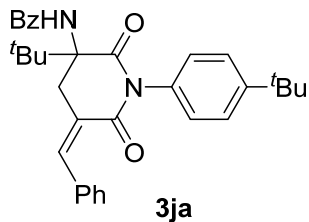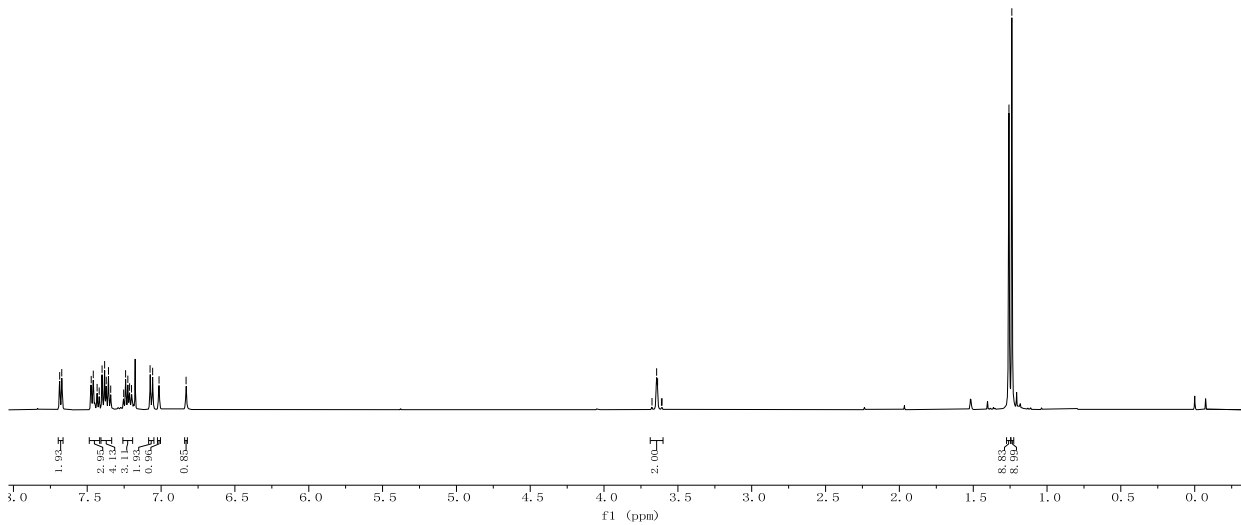

172.60  
166.79  
164.88  
151.24  
142.03  
134.85  
134.71  
133.10  
131.80  
129.66  
128.82  
128.74  
128.04  
127.74  
126.90  
126.35  
126.02

64.74

39.87  
37.86  
34.69  
31.35  
27.04

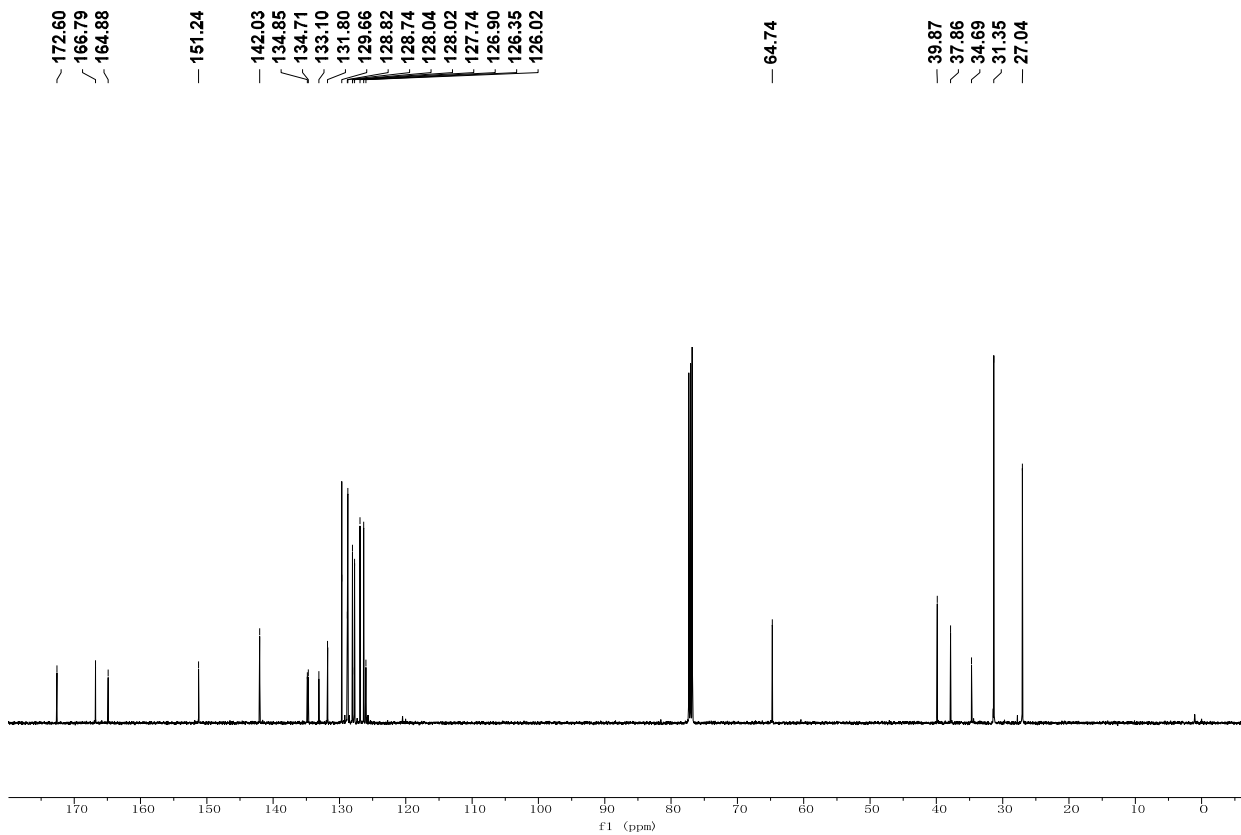

7.77  
7.75  
7.75  
7.56  
7.54  
7.52  
7.50  
7.46  
7.44  
7.43  
7.34  
7.32  
7.32  
7.31  
7.31  
7.30  
7.28  
7.15  
7.14  
7.13  
7.09  
6.91

3.75  
3.72  
3.72  
3.71  
3.69  
3.68  
2.96  
2.95  
2.93  
2.92  
2.90

1.34  
1.26  
1.24

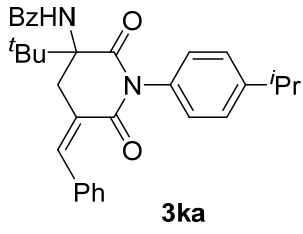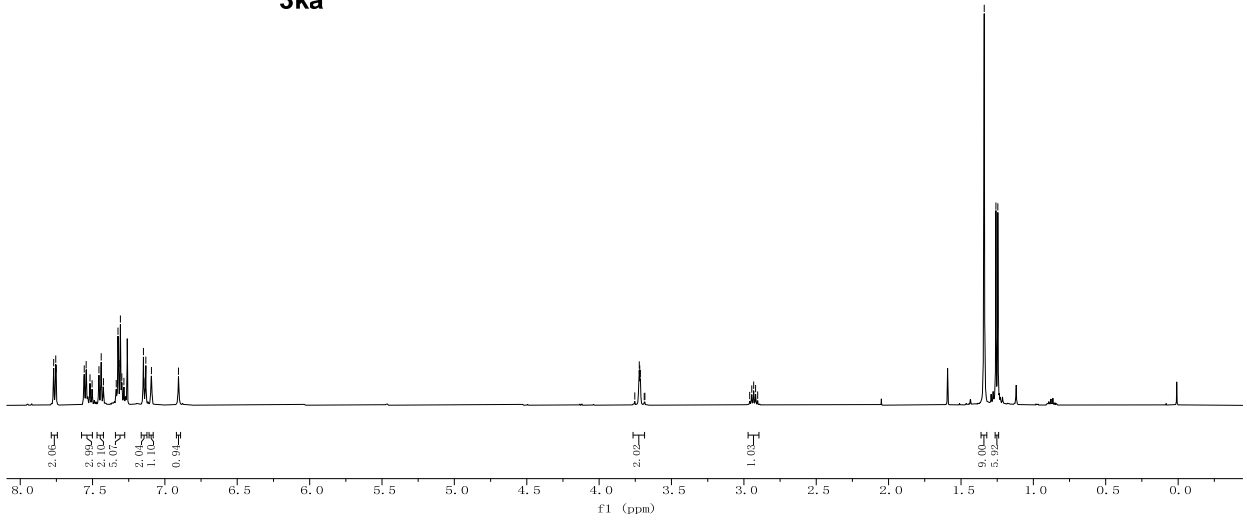

172.56  
166.80  
164.91

149.02

141.99  
134.83  
134.72  
133.36  
131.79  
129.67  
128.82  
128.74  
128.07  
128.03  
127.41  
126.90  
126.01

64.73

39.86  
37.89  
33.90  
27.02  
23.93  
23.90

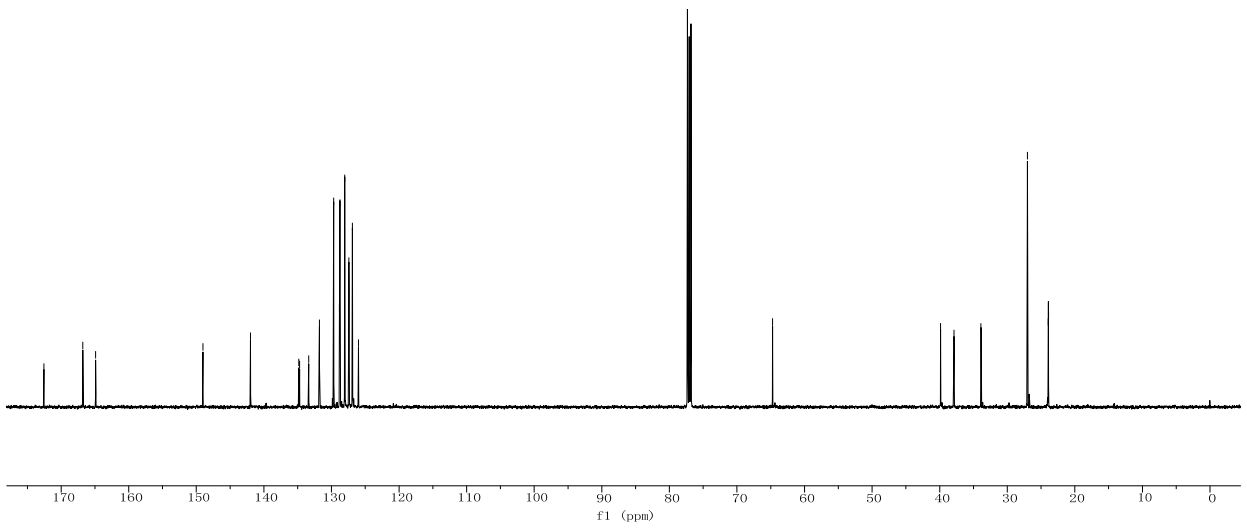



7.76  
7.76  
7.74  
7.74  
7.53  
7.53  
7.52  
7.51  
7.51  
7.50  
7.50  
7.50  
7.45  
7.45  
7.44  
7.44  
7.43  
7.42  
7.42  
7.29  
7.28  
7.11  
7.09  
6.92  
6.45  
6.45  
6.45  
6.44  
5.76  
5.76  
5.75  
5.75  
5.75  
3.76  
3.72  
3.64  
3.63  
3.63  
3.60  
3.60  
3.59  
3.59  
2.39

— 1.24

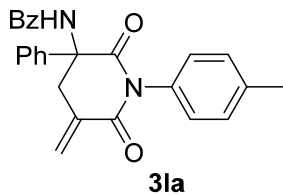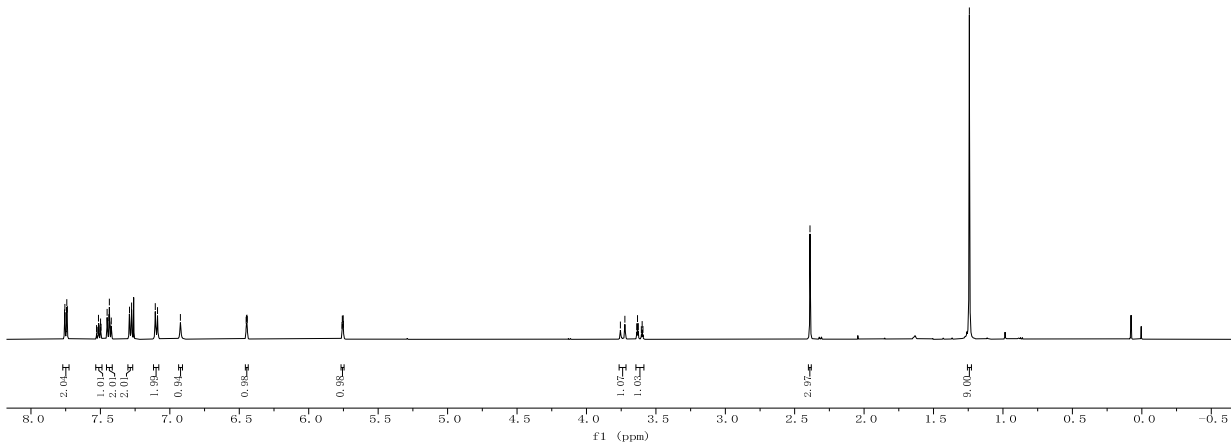

171.29  
165.81  
164.07

137.52  
134.26  
133.63  
132.05  
130.76  
128.97  
127.69  
126.86  
125.83  
124.78

— 63.43

— 38.85

— 32.57

— 25.80

— 20.21

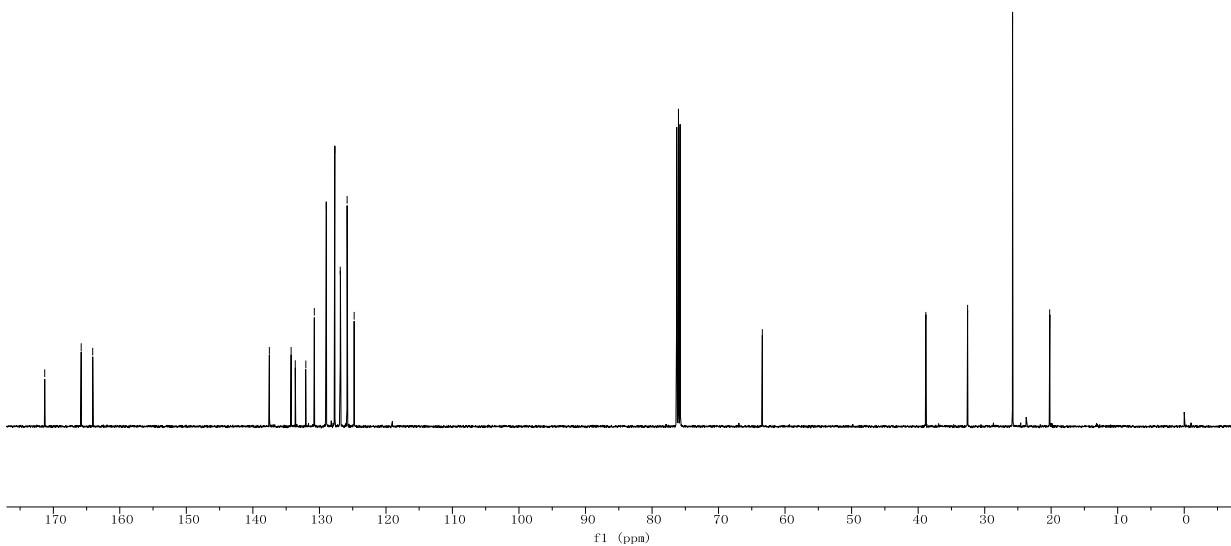

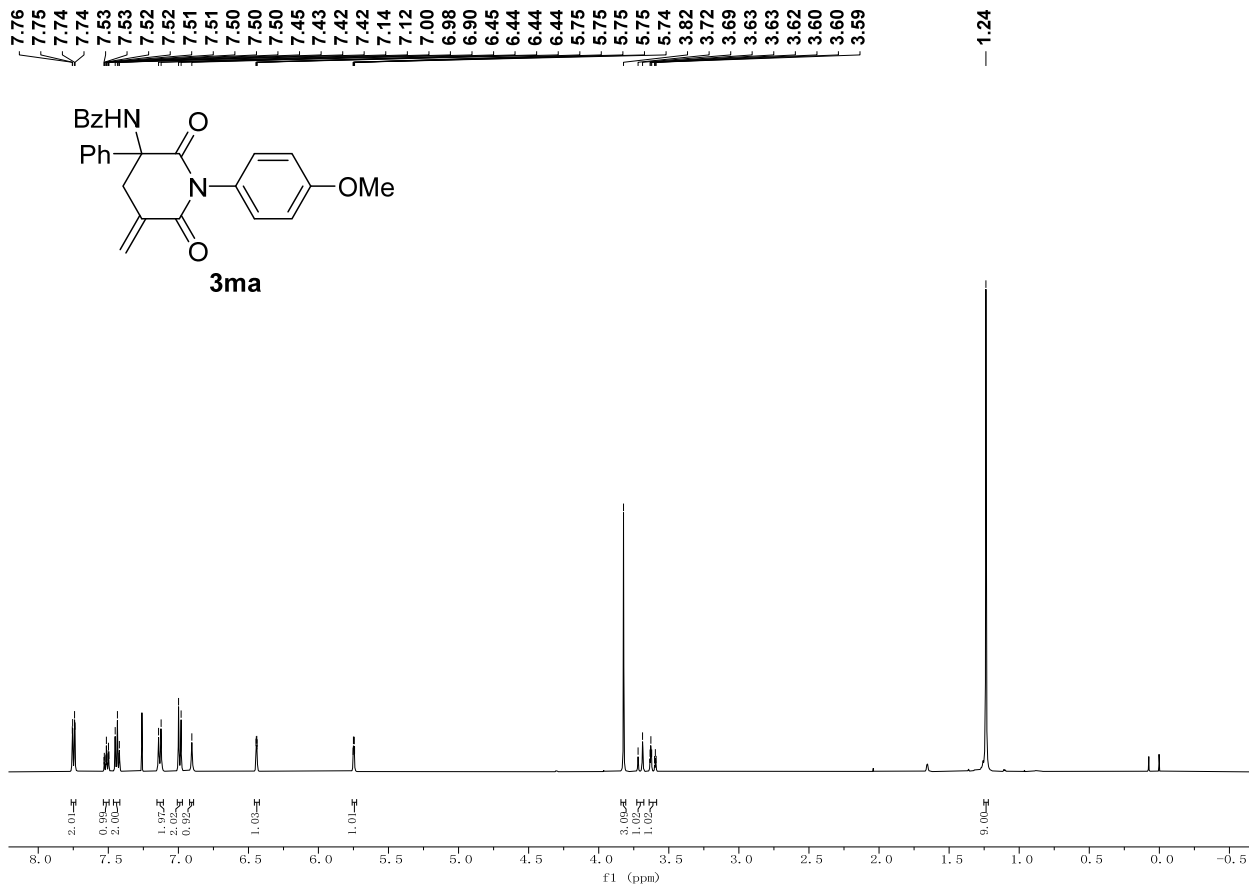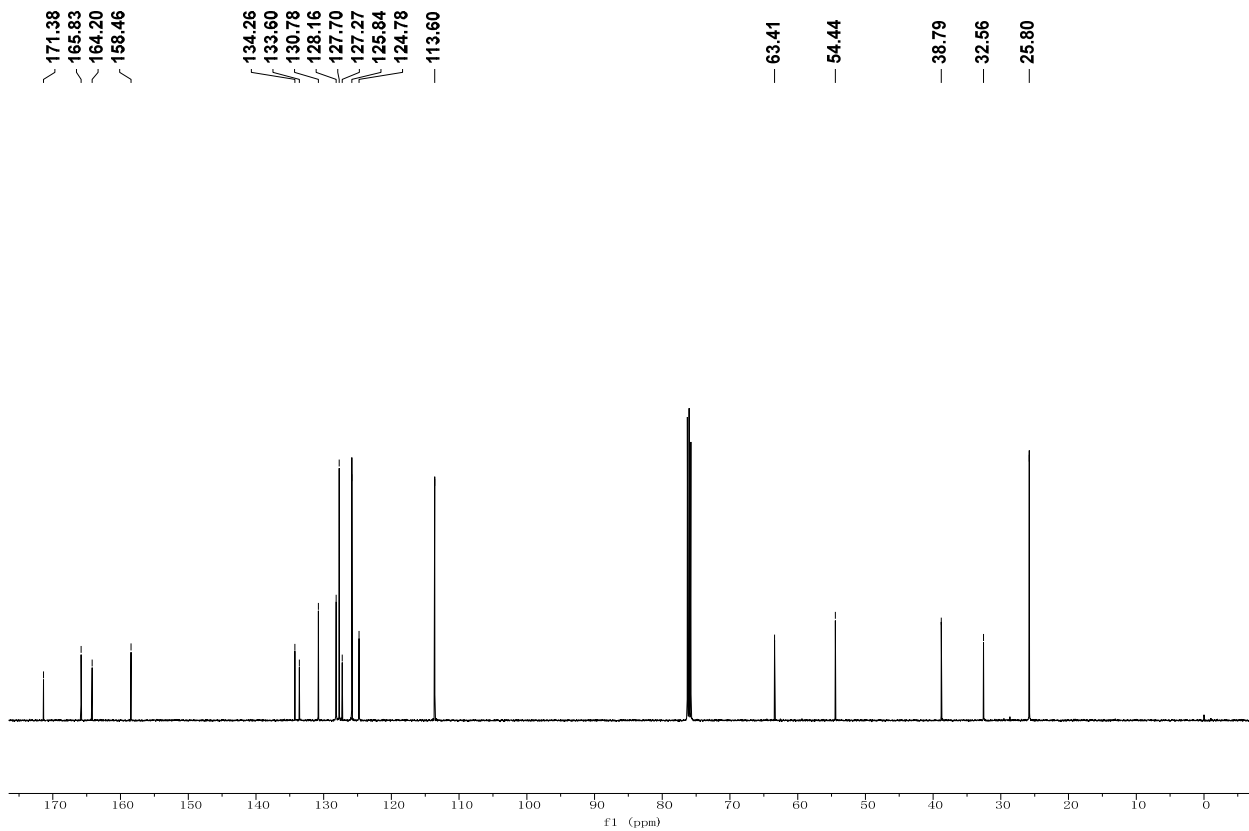

7.74  
7.73  
7.73  
7.54  
7.54  
7.53  
7.52  
7.51  
7.51  
7.51  
7.46  
7.45  
7.44  
7.43  
7.43  
7.19  
7.17  
6.76  
6.44  
6.44  
6.44  
6.43  
5.75  
5.75  
5.74  
3.69  
3.69  
3.68  
3.66  
3.65  
3.65  
3.55  
3.51

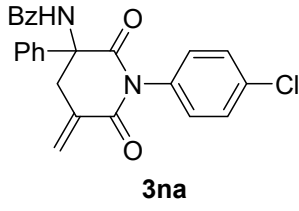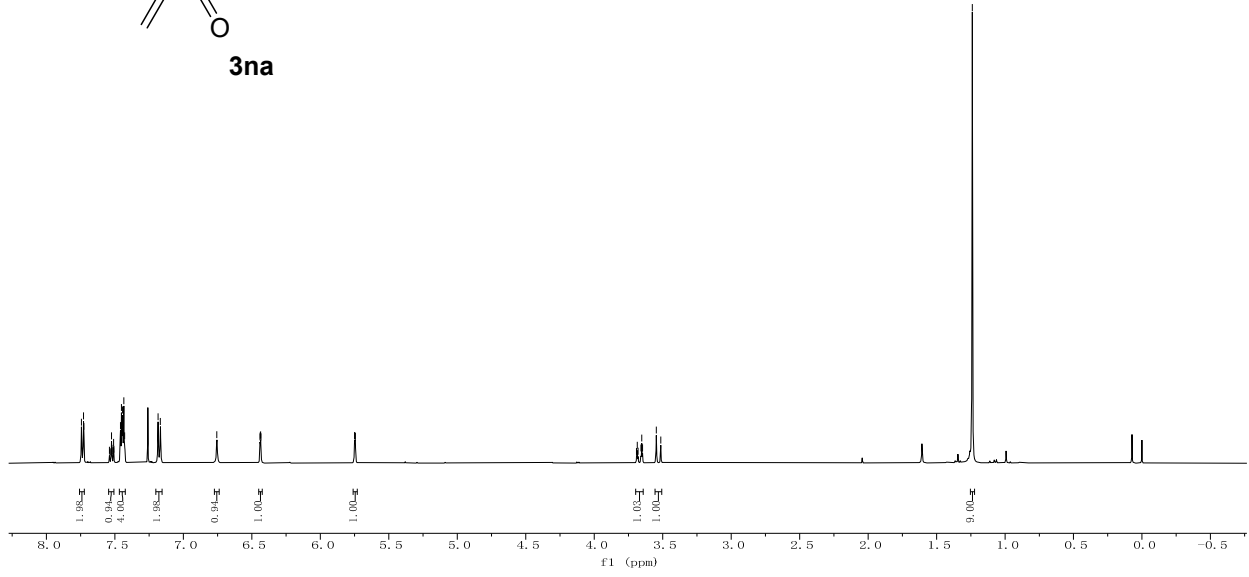

171.80  
167.07  
164.94

135.21  
134.51  
134.38  
134.31  
131.95  
129.81  
129.50  
128.80  
126.88  
125.93

64.19

39.44

33.57

26.70

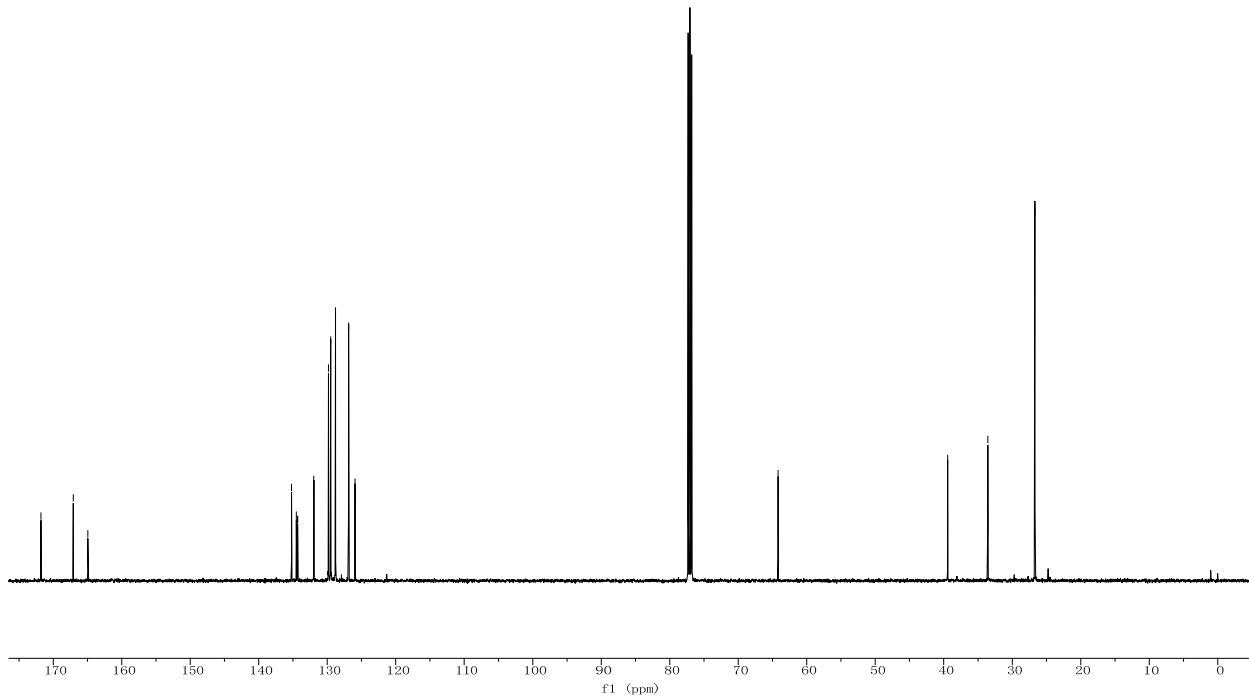



7.76  
7.76  
7.74  
7.74  
7.53  
7.52  
7.52  
7.51  
7.50  
7.50  
7.49  
7.48  
7.47  
7.45  
7.45  
7.44  
7.44  
7.43  
7.43  
7.42  
7.42  
7.42  
7.41  
7.41  
7.40  
7.23  
7.21  
6.89  
6.45  
6.45  
6.45  
6.45  
5.76  
5.76  
5.76  
3.72  
3.69  
3.66  
3.65  
3.63  
3.62  
1.25

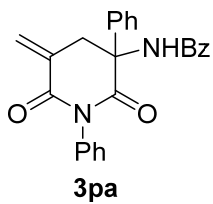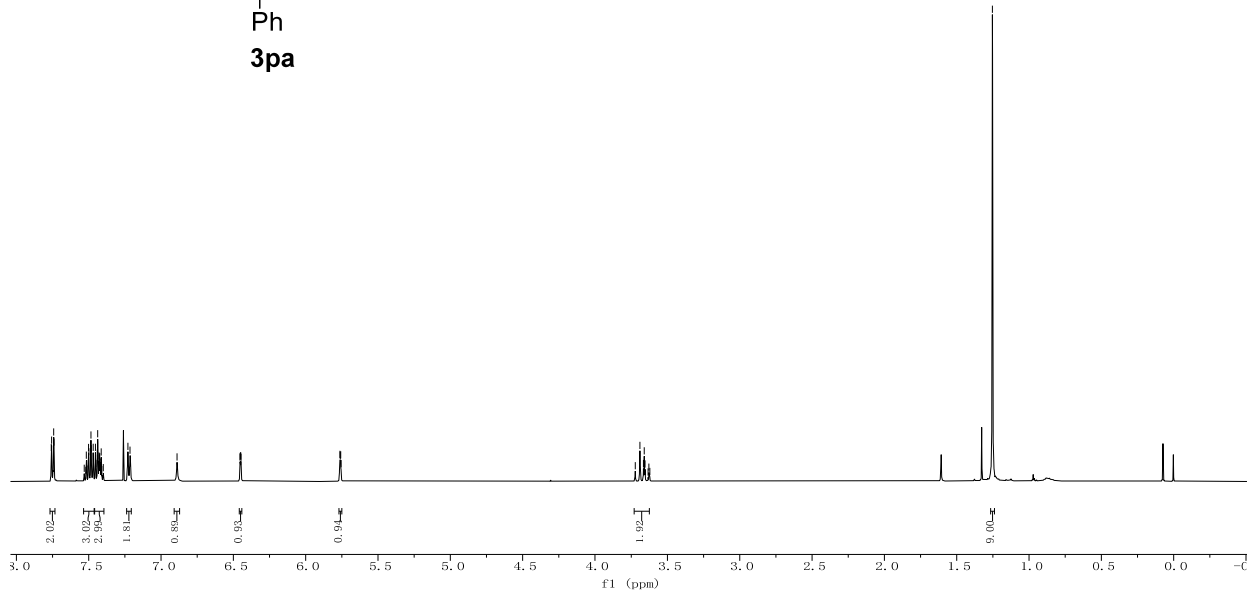

165.85  
164.00  
134.79  
134.27  
133.58  
130.80  
128.26  
127.71  
127.60  
127.24  
125.85  
124.82  
63.41  
32.58  
25.80

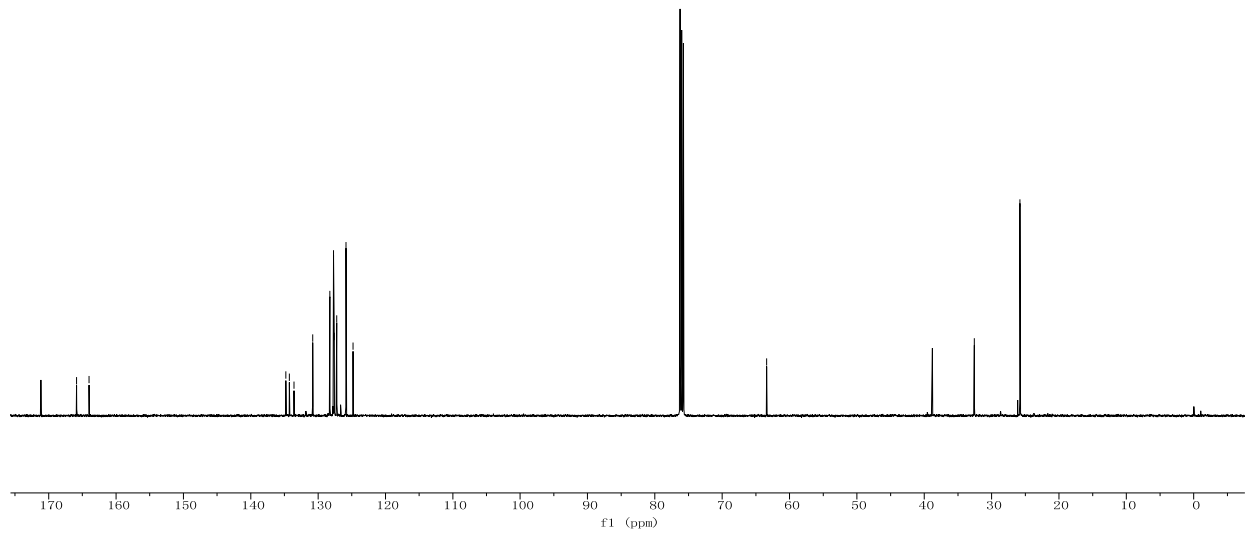

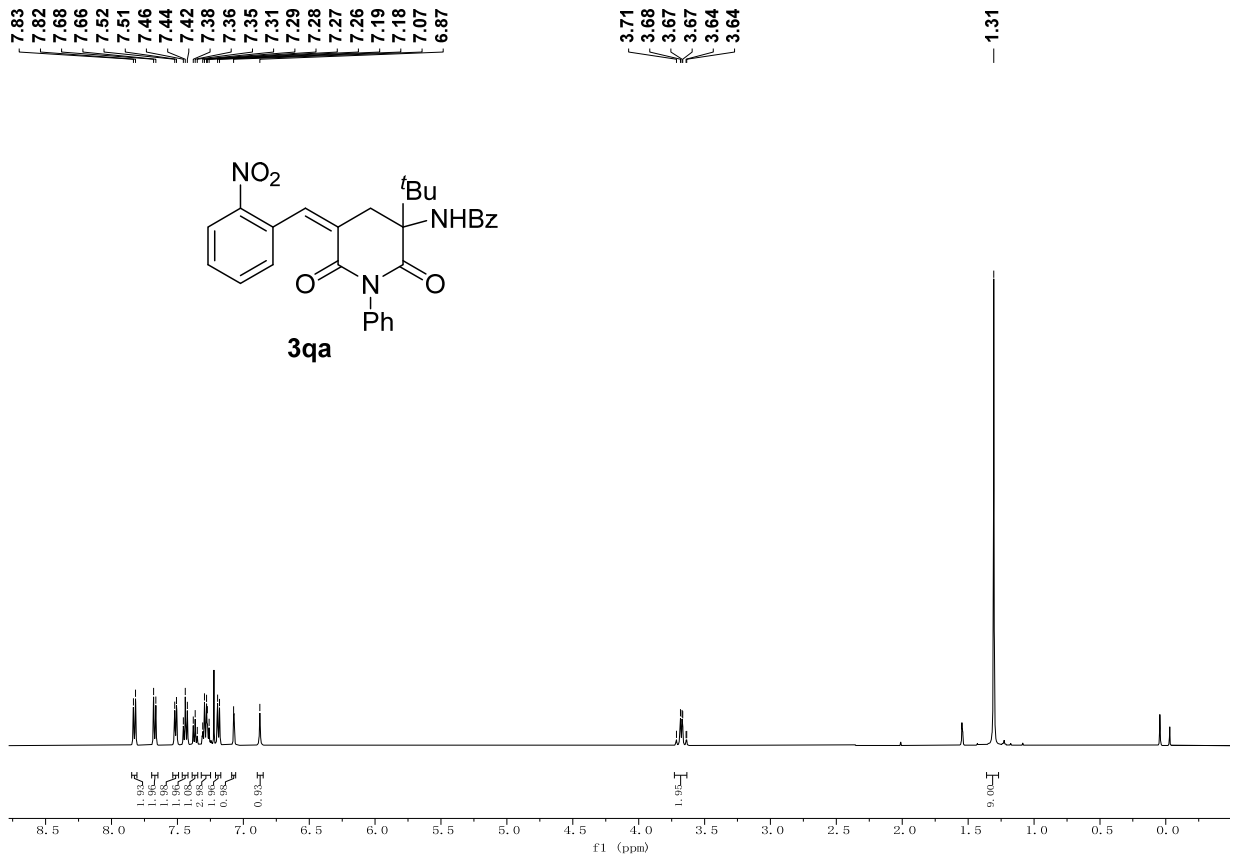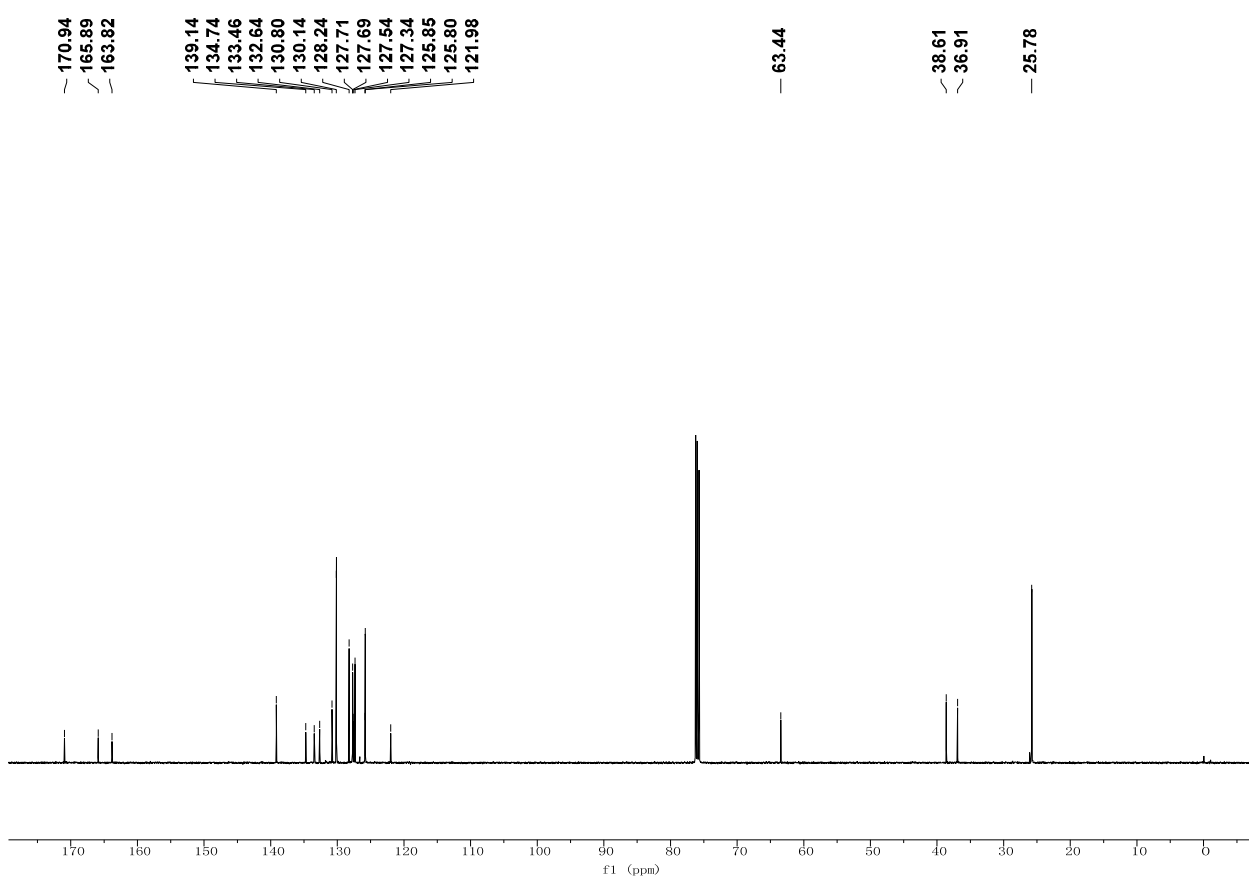

7.87  
7.85  
7.72  
7.70  
7.56  
7.54  
7.49  
7.48  
7.46  
7.42  
7.40  
7.39  
7.34  
7.33  
7.32  
7.31  
7.30  
7.23  
7.22  
7.11  
6.91

3.75  
3.72  
3.71  
3.70  
3.68  
3.67

1.34

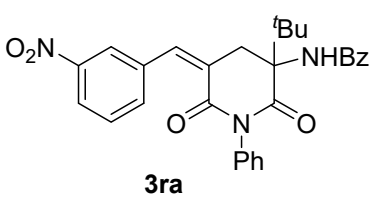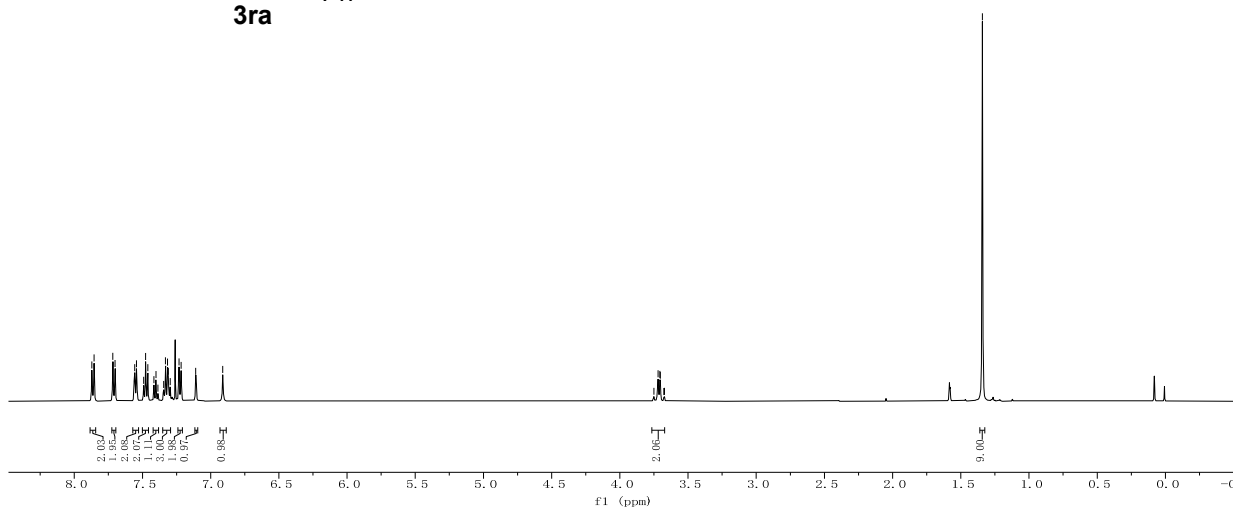

170.76  
166.00  
163.74

140.88  
133.97  
133.62  
133.39  
131.42  
130.87  
129.29  
128.55  
127.89  
127.76  
127.03  
125.83  
124.81  
121.53

63.35

38.34  
36.89

25.76

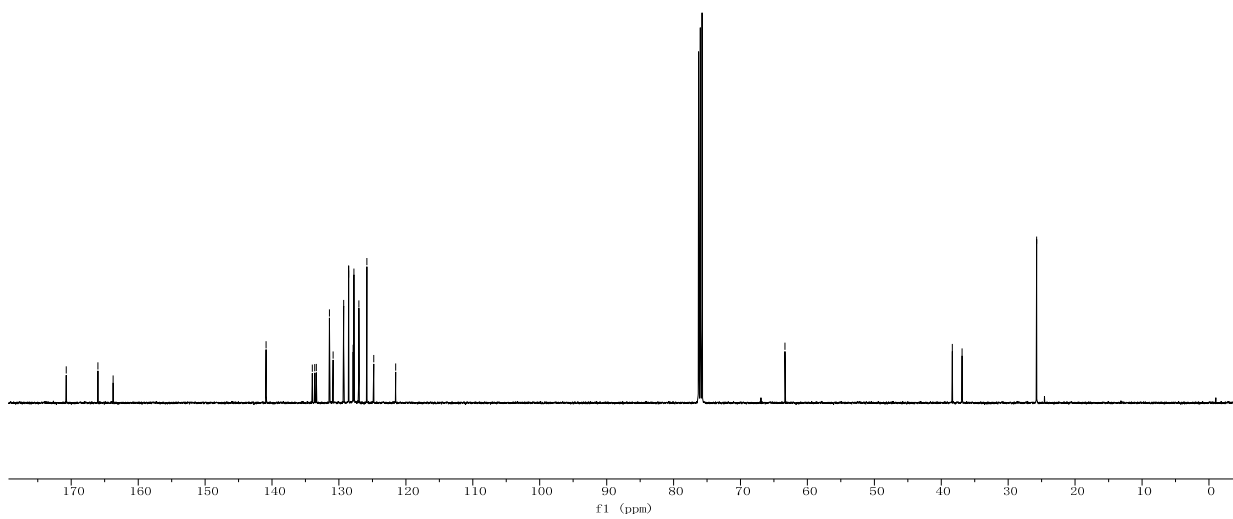

7.85  
7.83  
7.75  
7.73  
7.55  
7.54  
7.49  
7.47  
7.46  
7.42  
7.41  
7.40  
7.40  
7.39  
7.39  
7.38  
7.34  
7.33  
7.33  
7.31  
7.31  
7.30  
7.22  
7.20  
7.11  
6.91  
3.74  
3.71  
3.69  
3.68  
3.66  
3.65

1.33

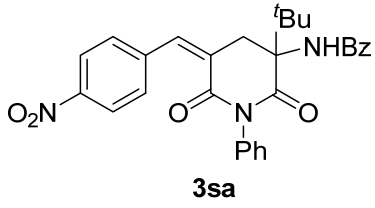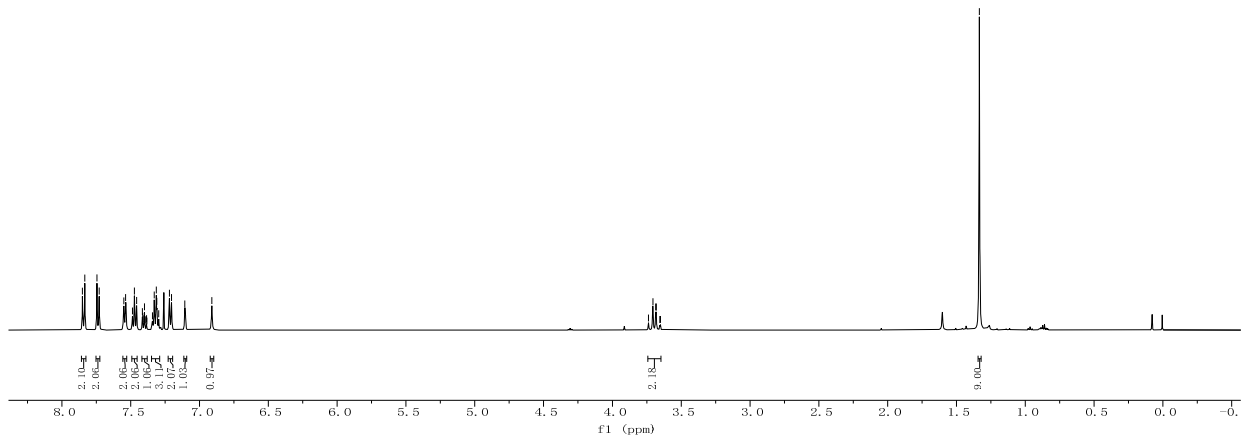

172.03  
167.23  
165.03

142.07  
134.85  
134.64  
134.60  
132.09  
130.17  
129.76  
129.65  
129.10  
128.97  
128.24  
127.05  
126.05

64.57

39.55  
38.11

26.97

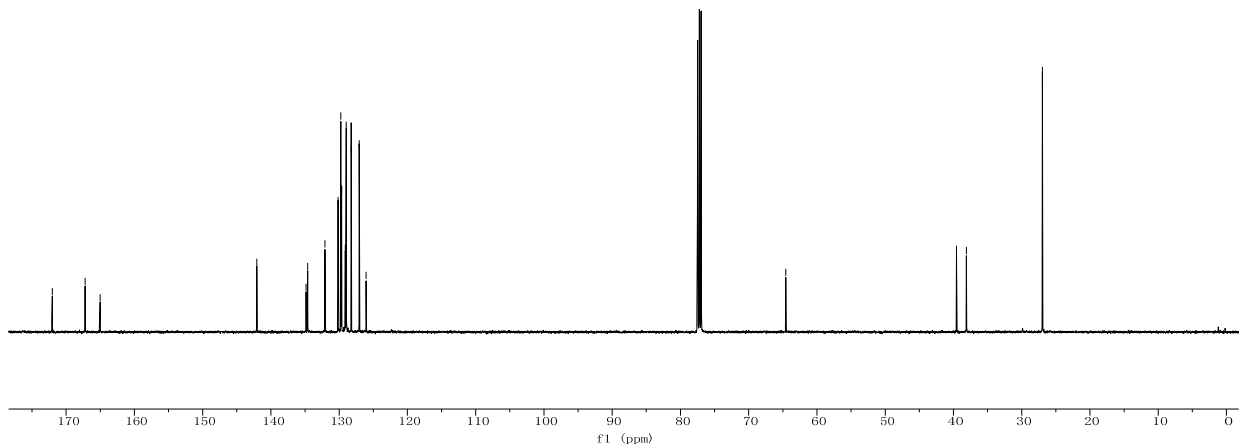





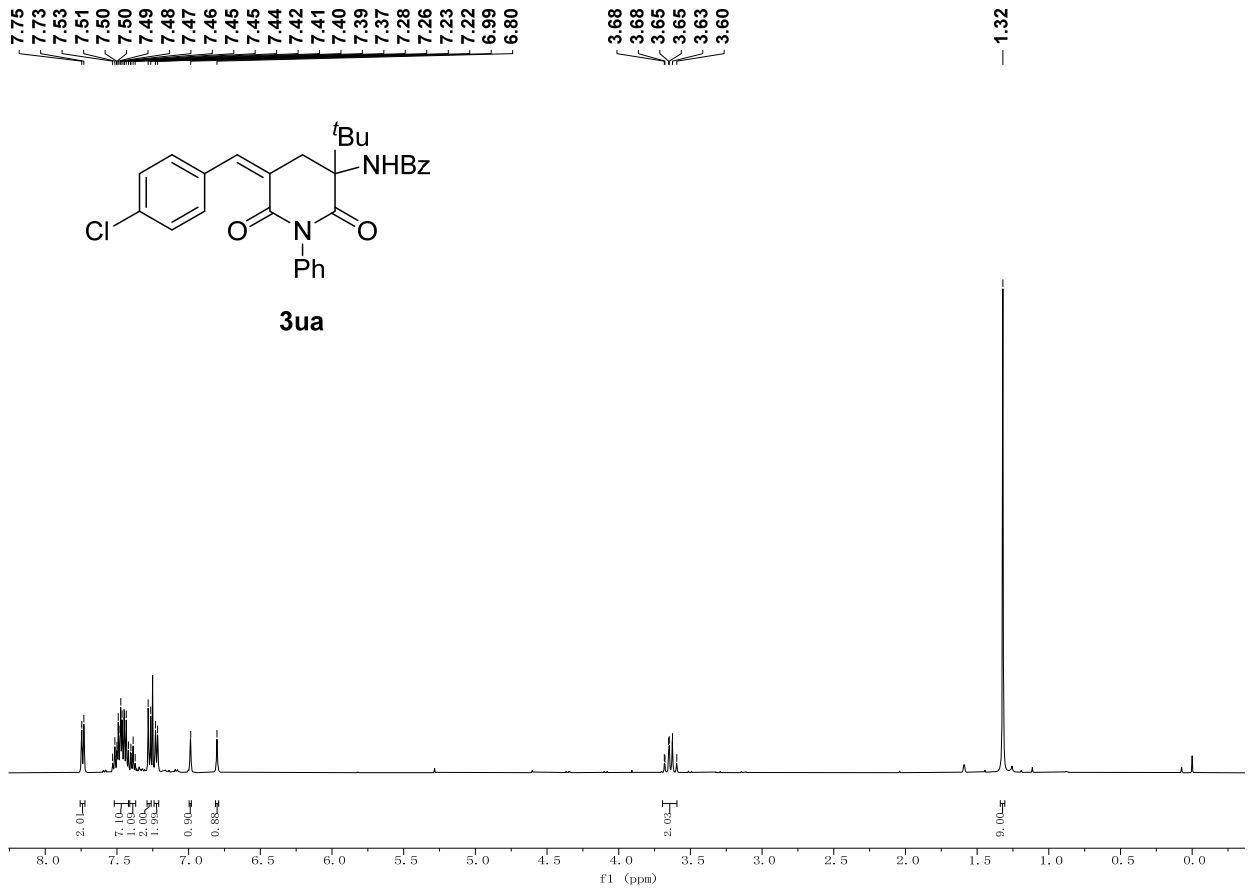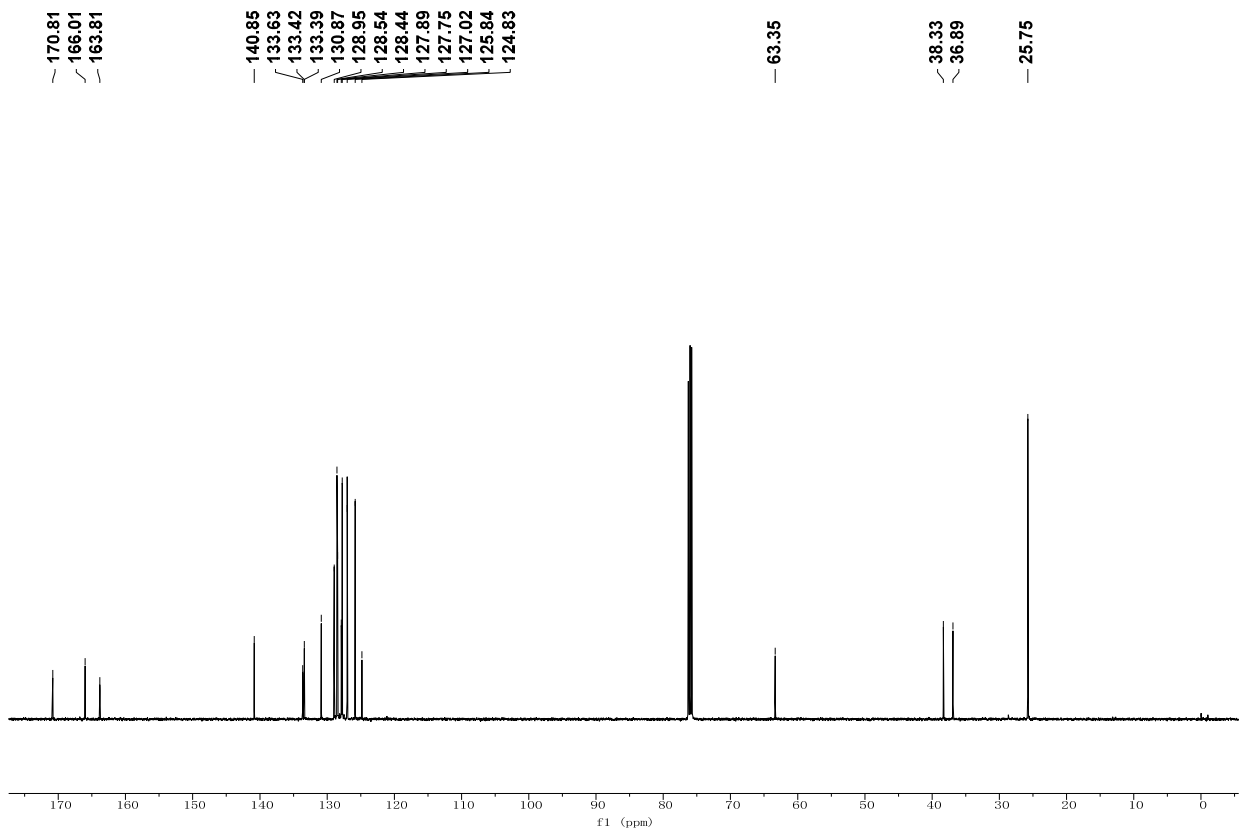

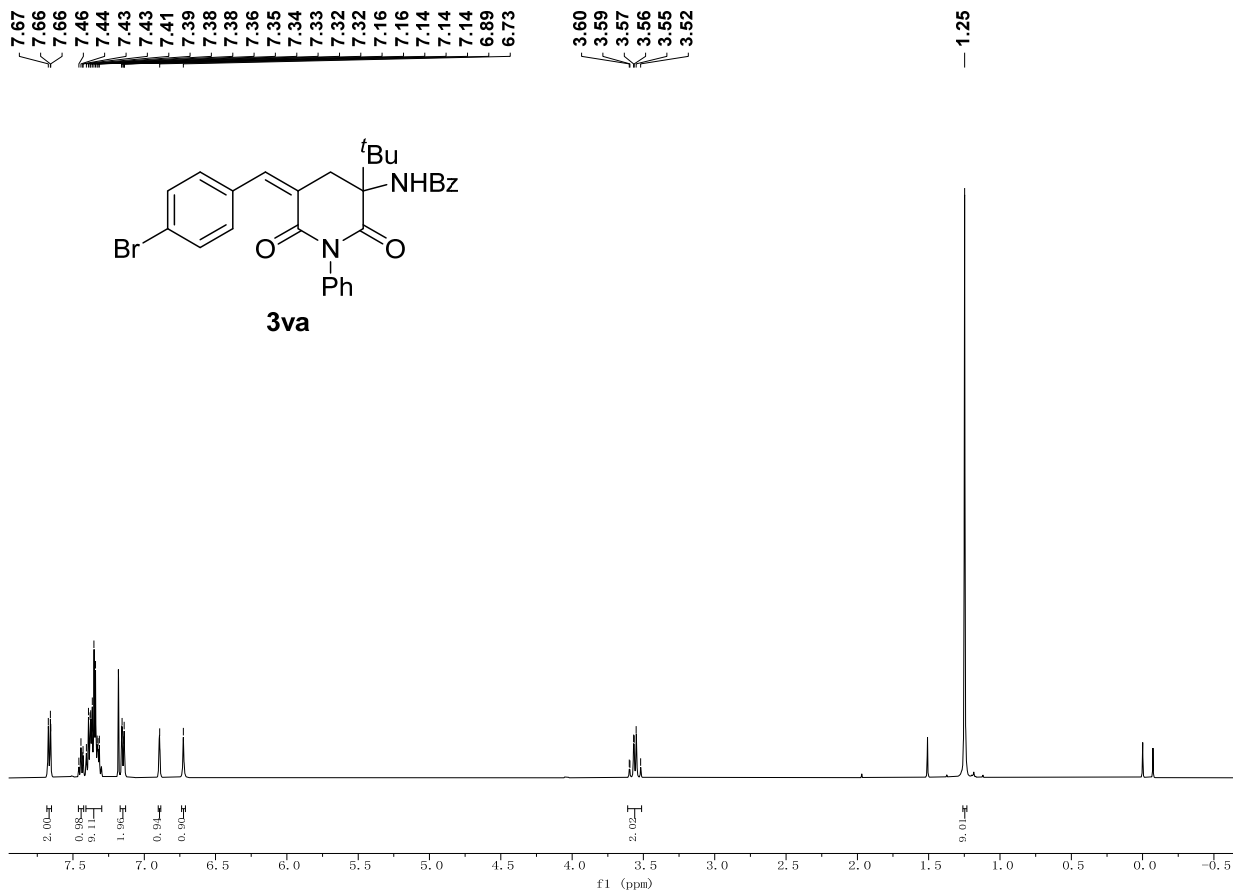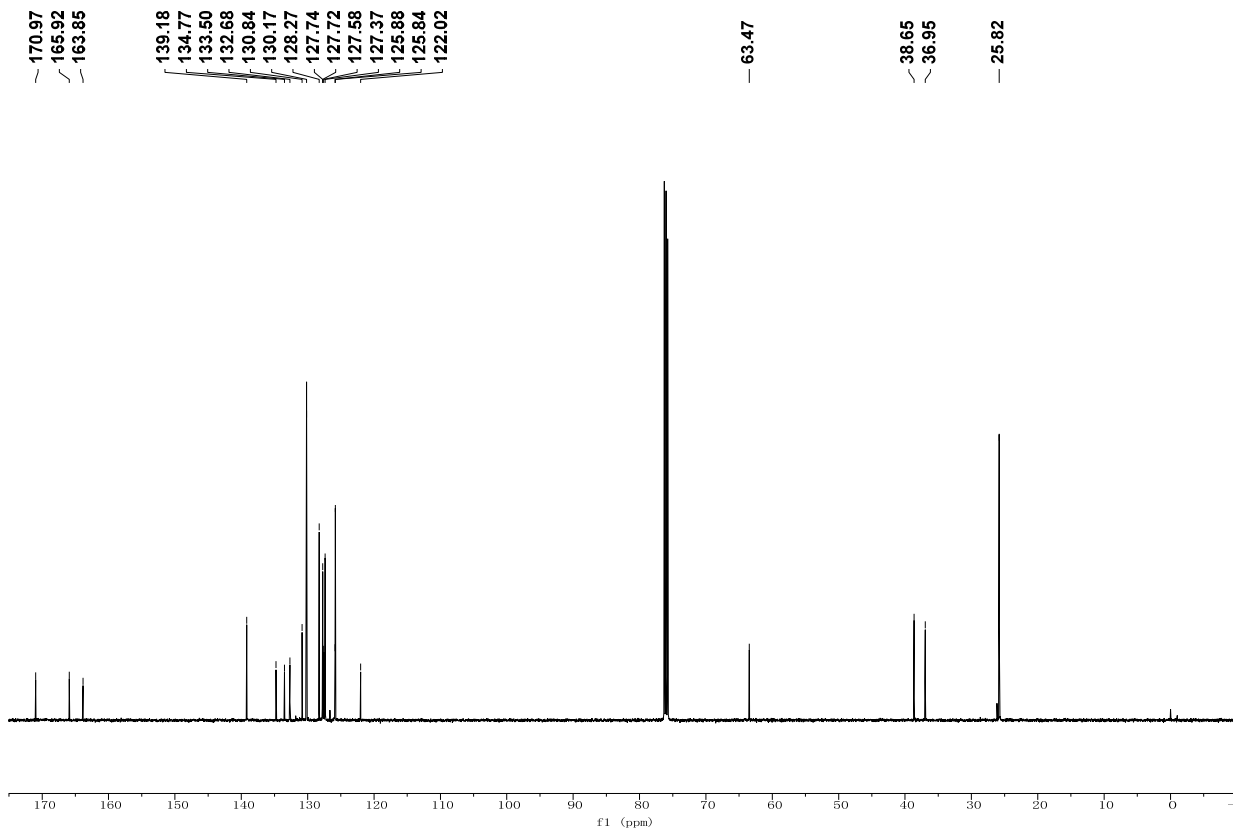

7.69  
7.68  
7.67  
7.46  
7.45  
7.44  
7.44  
7.43  
7.43  
7.42  
7.40  
7.39  
7.38  
7.37  
7.37  
7.35  
7.35  
7.33  
7.32  
7.31  
7.31  
7.30  
7.30  
7.22  
7.17  
7.16  
7.16  
7.15  
7.13  
7.12  
7.03  
7.02  
6.99  
6.79  
3.66  
3.66  
3.63  
3.63  
3.62  
3.62  
3.59  
3.59  
2.26

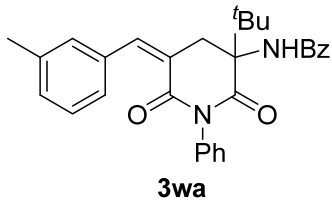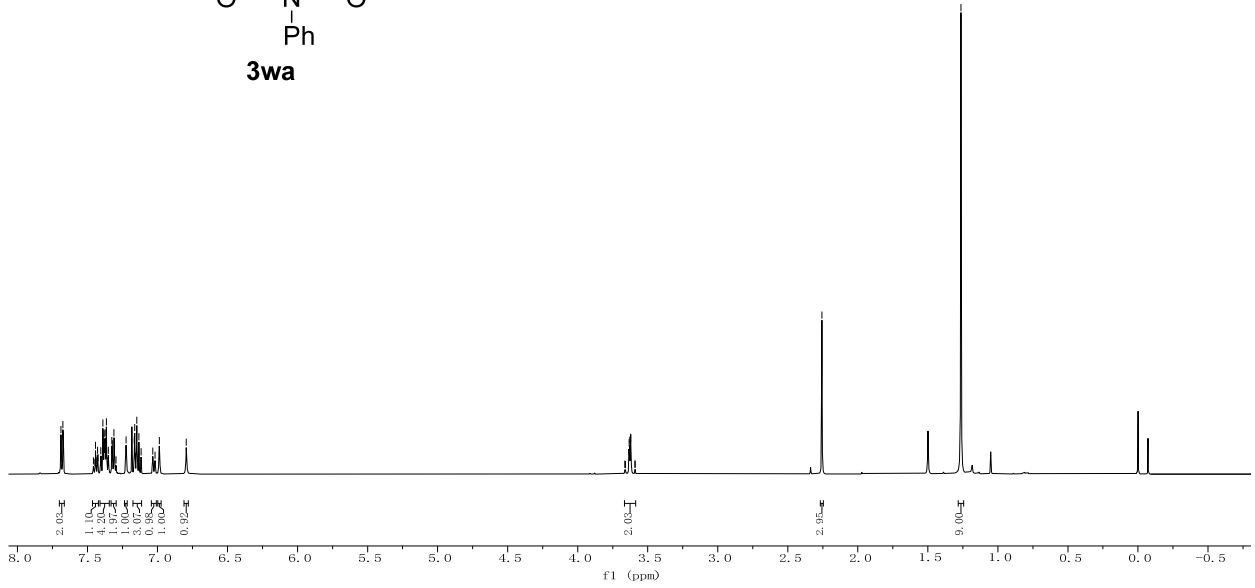

171.33  
165.80  
163.75

141.20  
136.52  
134.92  
133.73  
133.64  
130.76  
129.20  
128.63  
128.24  
127.71  
127.49  
127.43  
126.93  
125.85  
125.66  
124.74

63.65

38.75  
36.84

25.97  
20.38

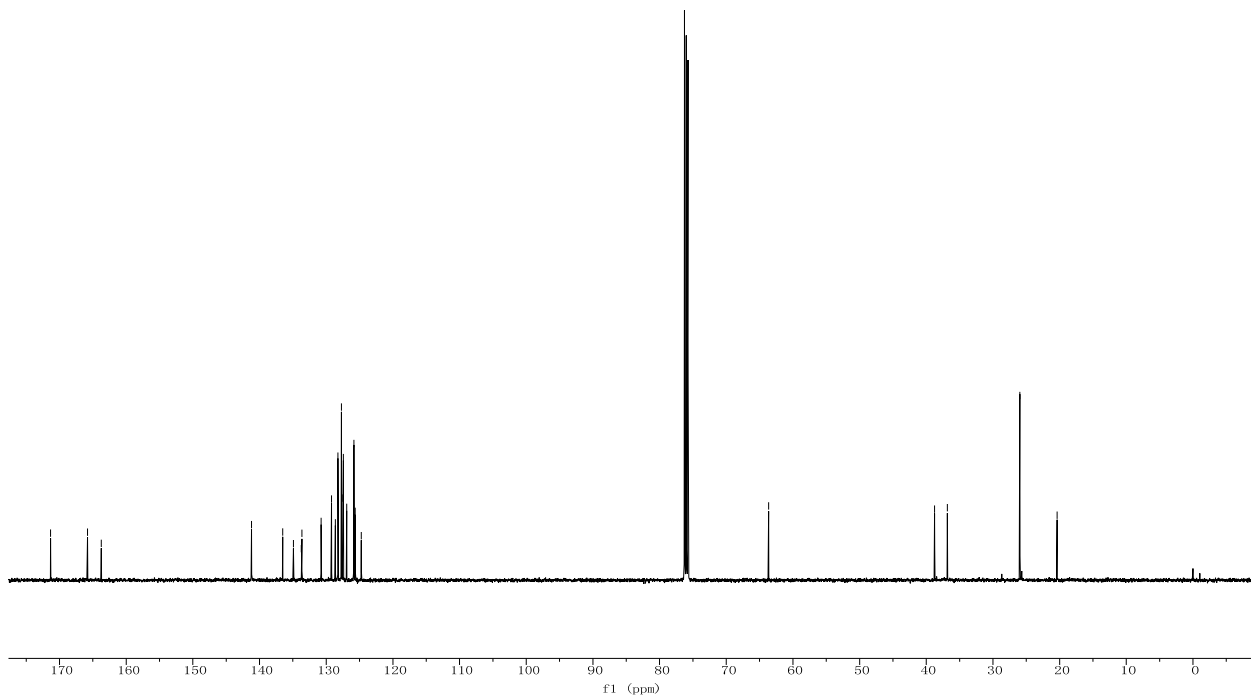

7.68  
7.67  
7.67  
7.43  
7.42  
7.41  
7.40  
7.39  
7.37  
7.36  
7.34  
7.33  
7.32  
7.31  
7.29  
7.16  
7.15  
7.06  
6.98  
6.79

3.62  
3.62  
3.61

2.25

1.25

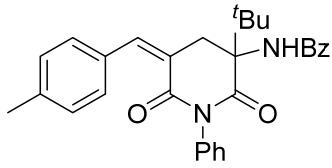

**3xa**

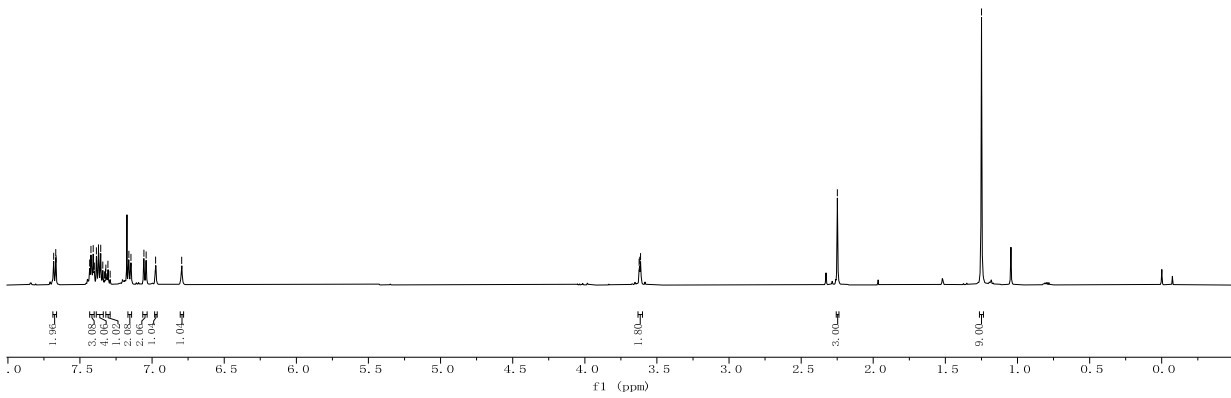

171.33  
165.79  
163.74  
141.19  
136.51  
134.91  
133.72  
133.64  
130.75  
129.20  
128.62  
128.23  
127.70  
127.49  
127.42  
126.92  
125.84  
125.65  
124.73

63.64

38.74  
36.83

25.96  
20.38

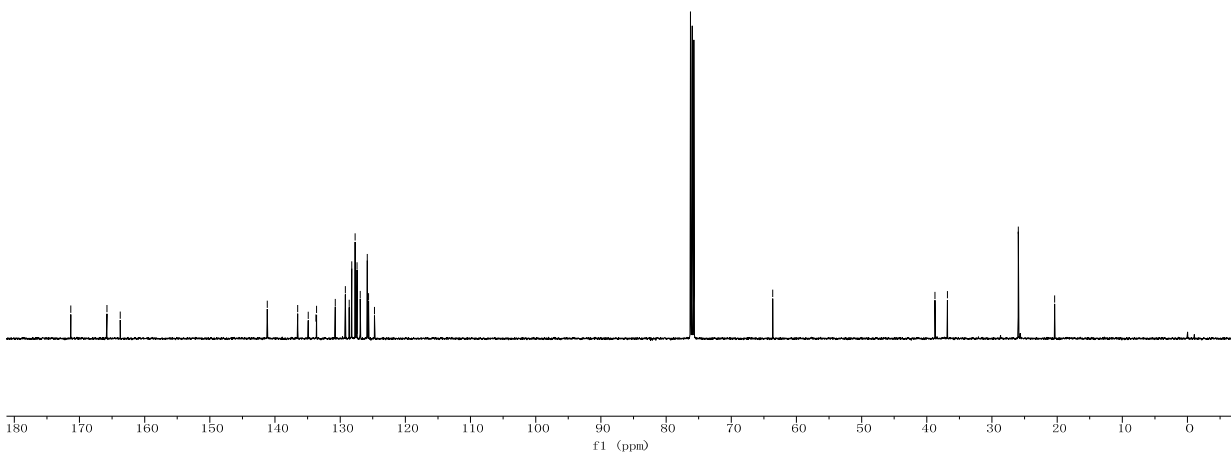

7.75  
7.74  
7.74  
7.53  
7.52  
7.51  
7.50  
7.50  
7.47  
7.45  
7.45  
7.44  
7.43  
7.42  
7.39  
7.39  
7.38  
7.36  
7.24  
7.23  
7.21  
7.11  
7.09  
7.09  
7.04  
6.84  
6.84  
6.83  
3.78  
3.70  
3.70  
3.67  
3.67  
3.65  
3.65  
3.62  
3.62

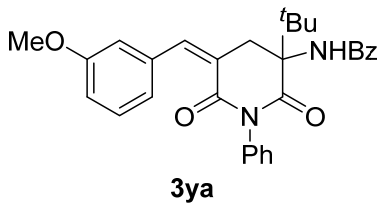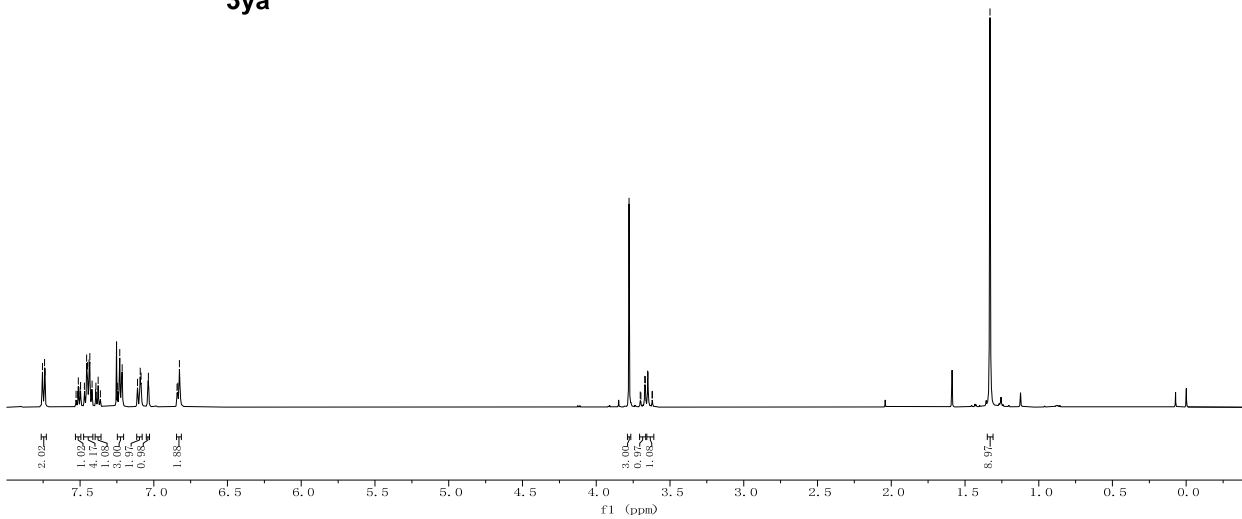

172.24  
166.87  
164.82  
159.18  
141.44  
136.20  
135.96  
134.63  
131.82  
129.27  
129.06  
128.76  
128.52  
128.47  
126.89  
126.45  
121.99  
114.99  
114.35

64.65  
55.26  
39.73  
37.93  
26.94

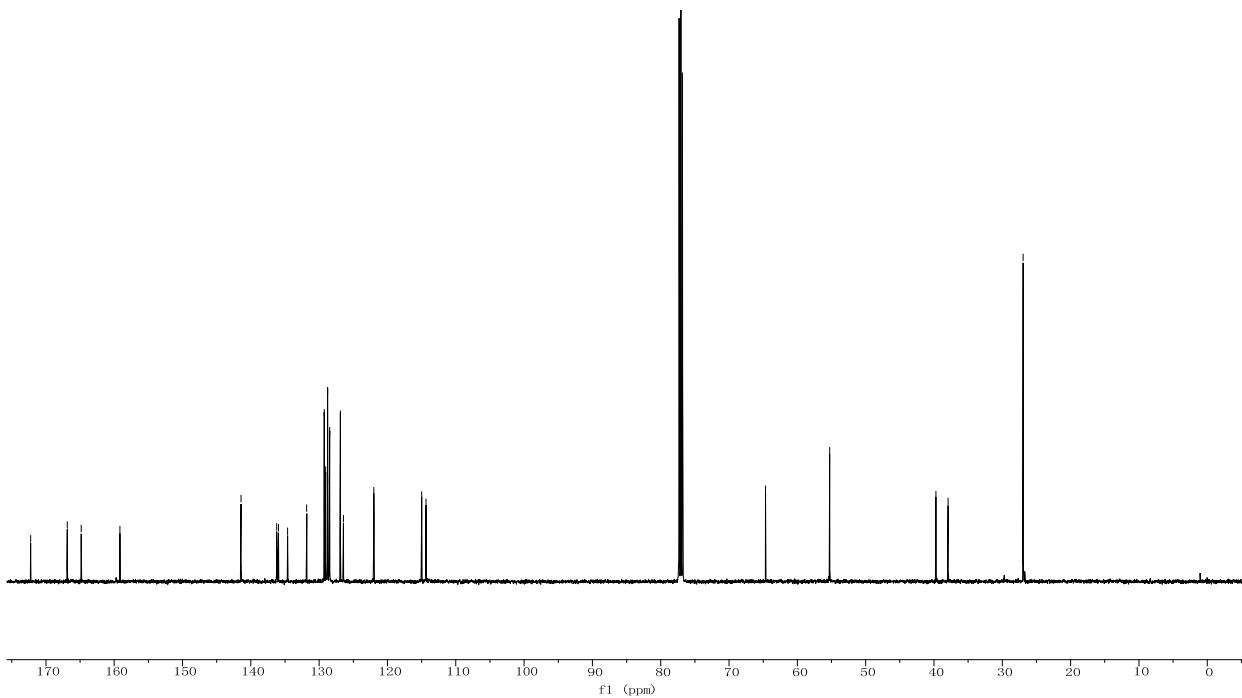

7.76  
7.75  
7.74  
7.53  
7.52  
7.52  
7.51  
7.51  
7.50  
7.48  
7.46  
7.46  
7.45  
7.44  
7.43  
7.40  
7.40  
7.38  
7.37  
7.25  
7.24  
7.22  
7.12  
7.10  
7.09  
7.04  
6.85  
6.84  
6.83  
3.78  
3.71  
3.70  
3.68  
3.67  
3.66  
3.66  
3.63  
3.63

— 1.34

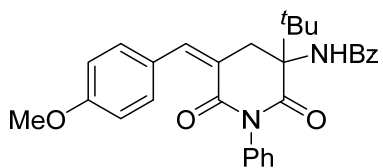

3za

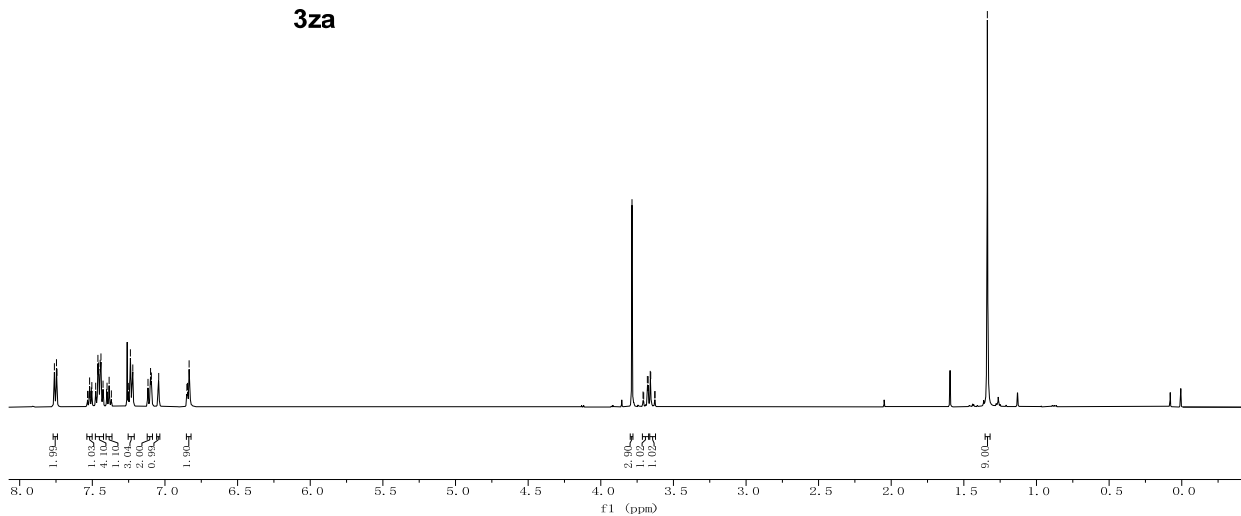

172.24  
166.87  
164.82  
159.18  
141.44  
136.20  
135.96  
134.63  
131.82  
129.27  
129.06  
128.76  
128.52  
128.47  
126.89  
126.45  
121.99  
114.99  
114.35

— 64.65

— 55.26

— 39.73

— 37.93

— 26.94

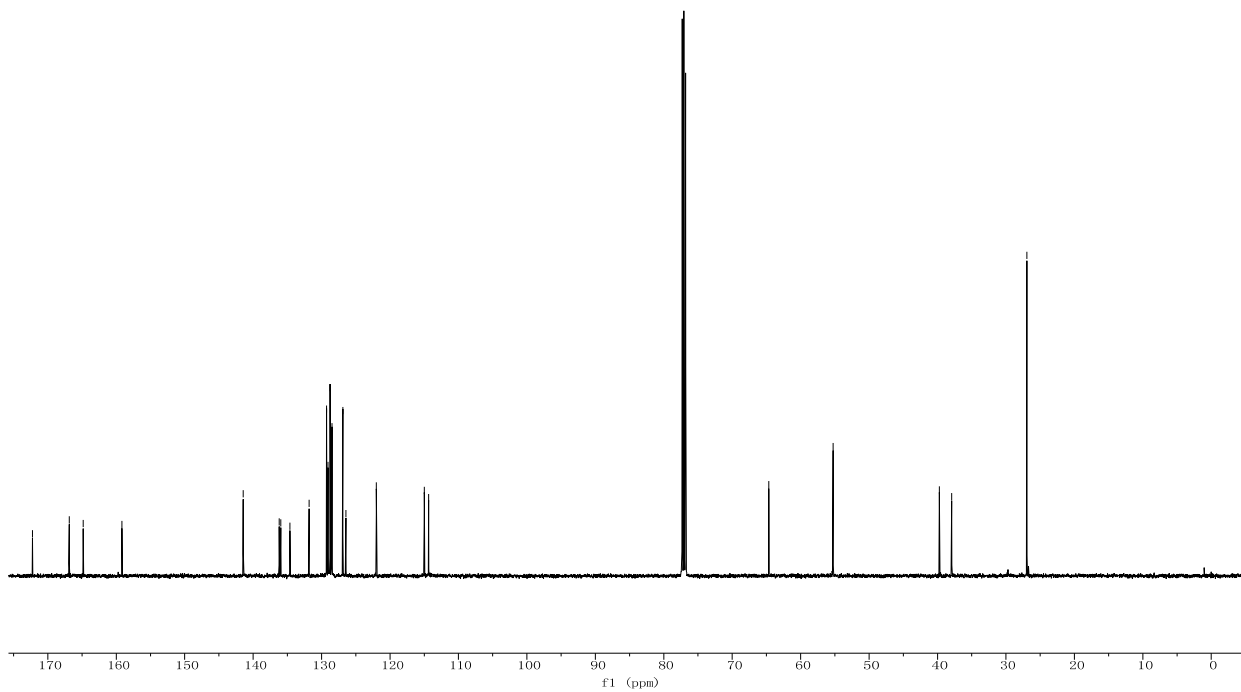

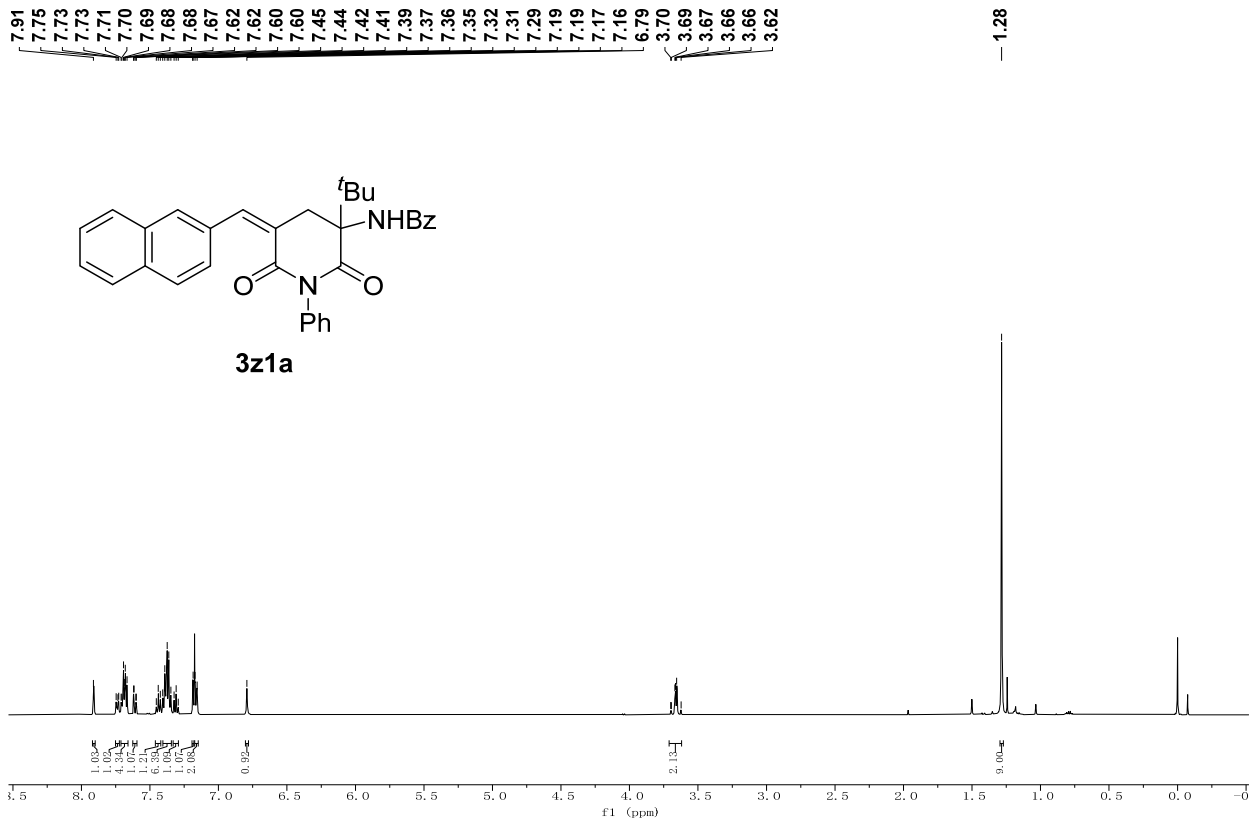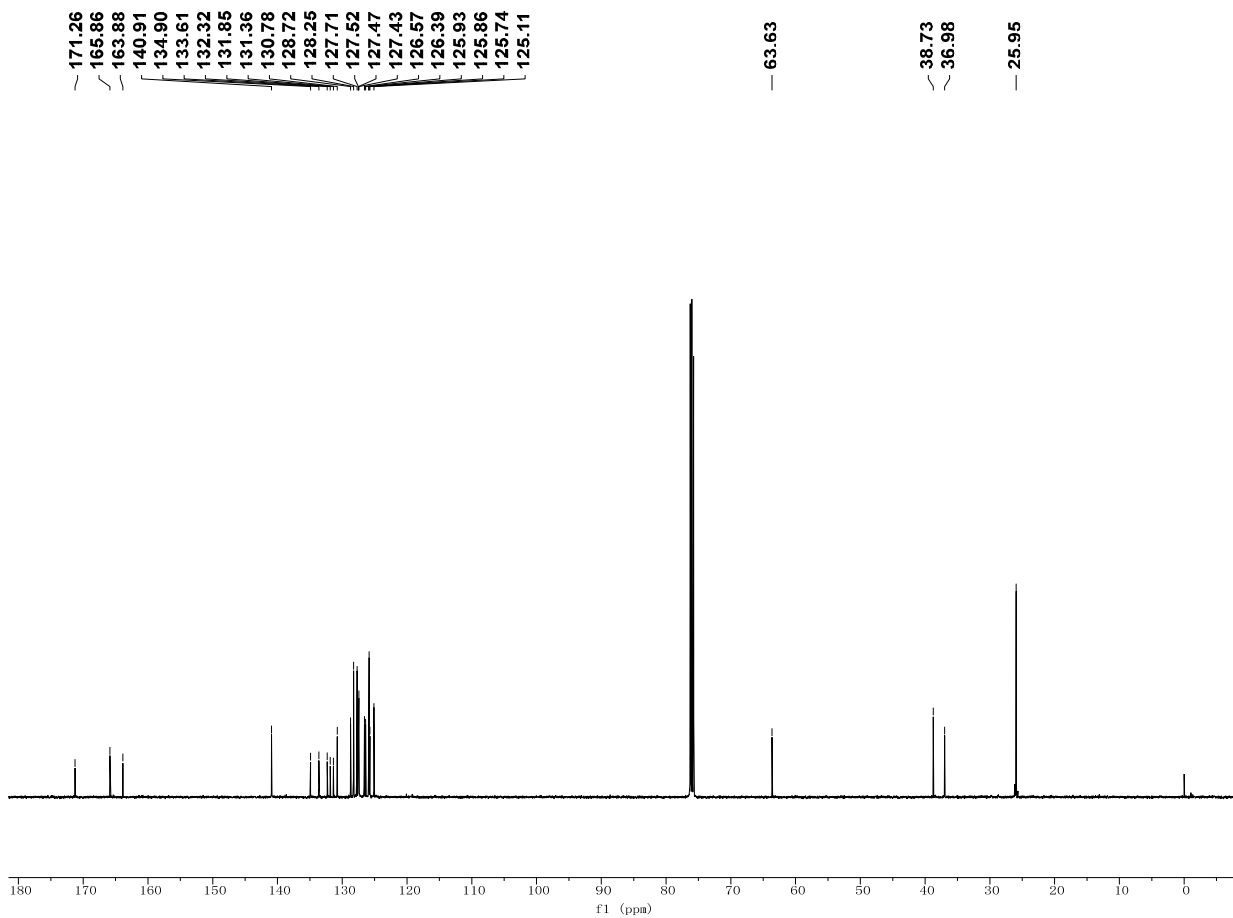



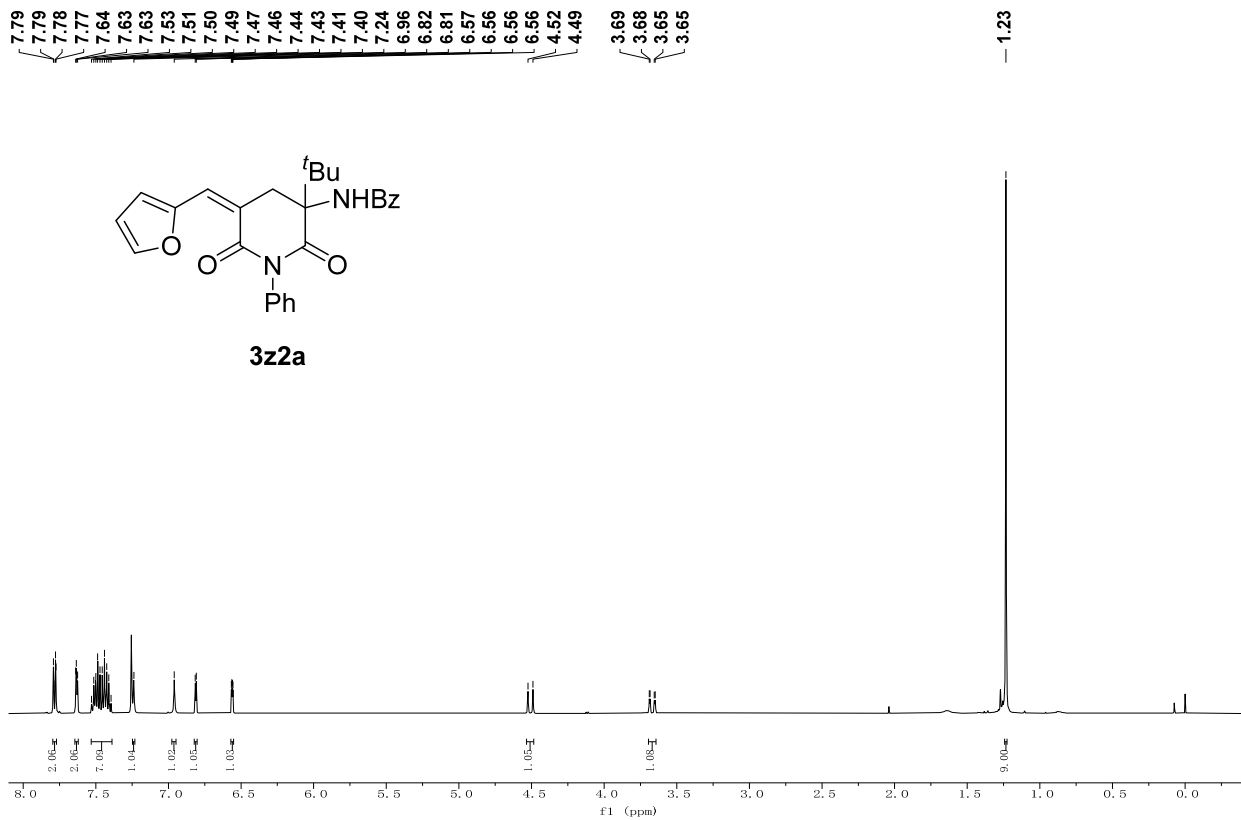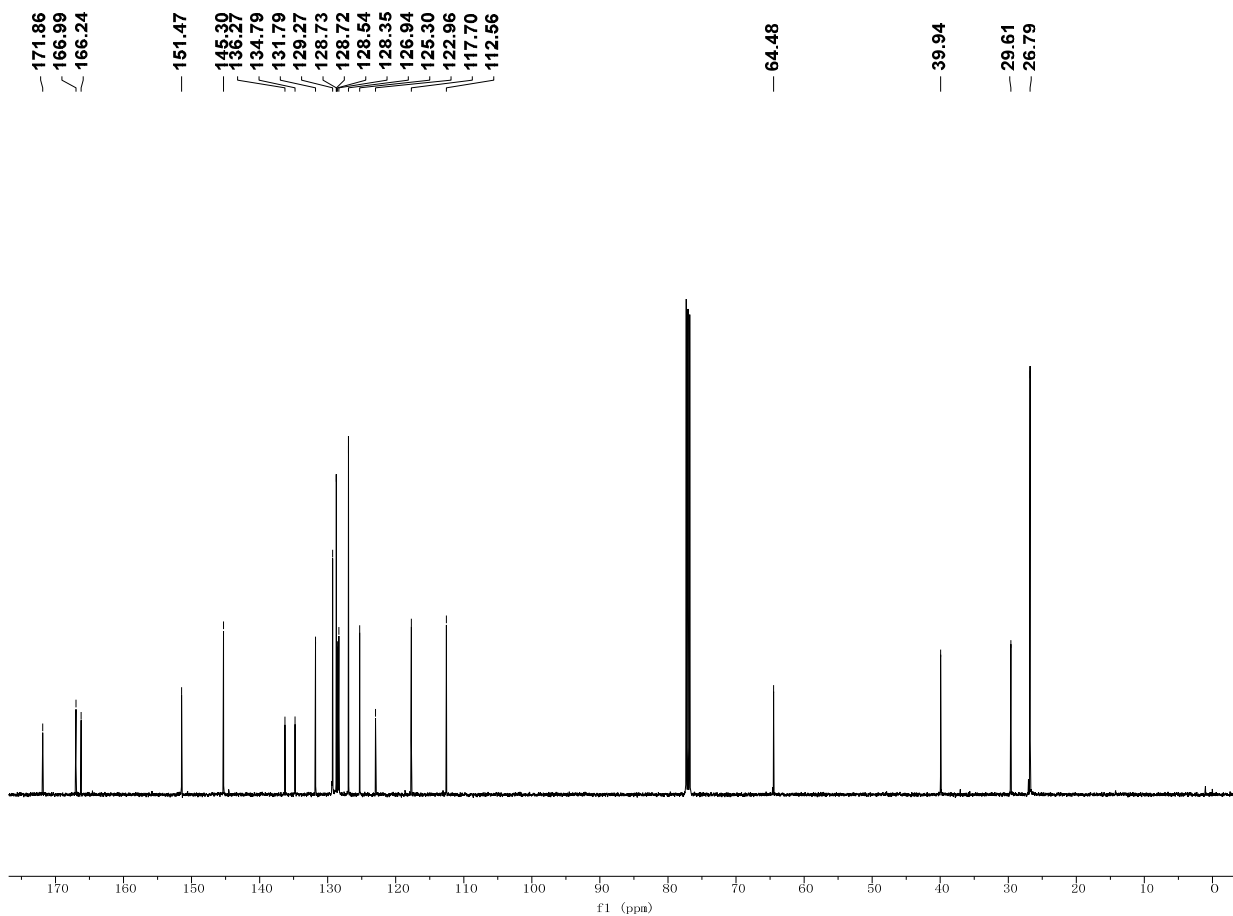

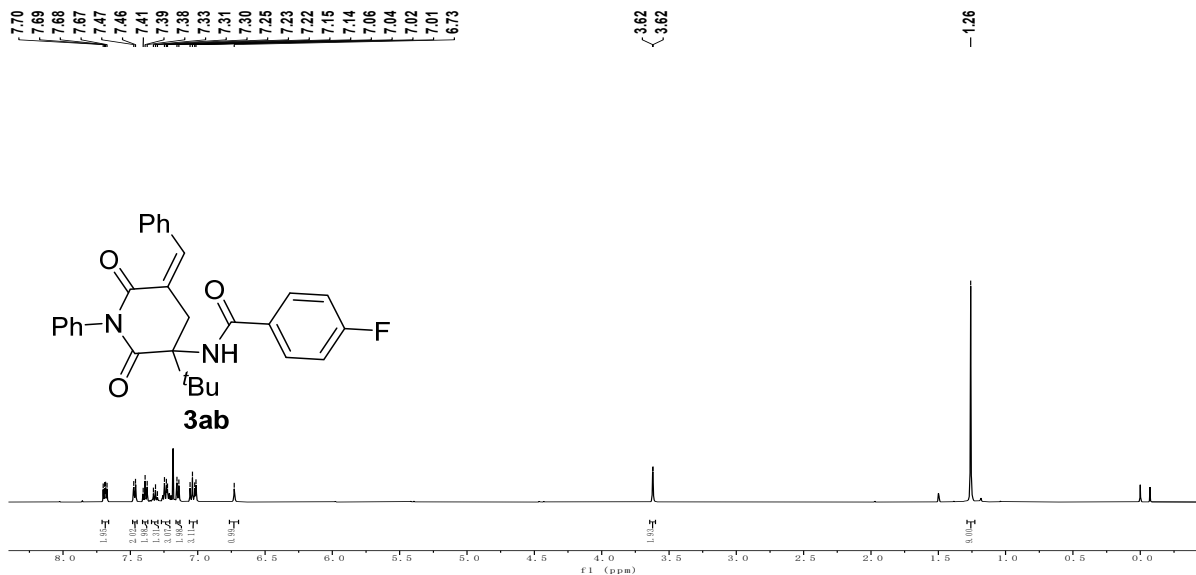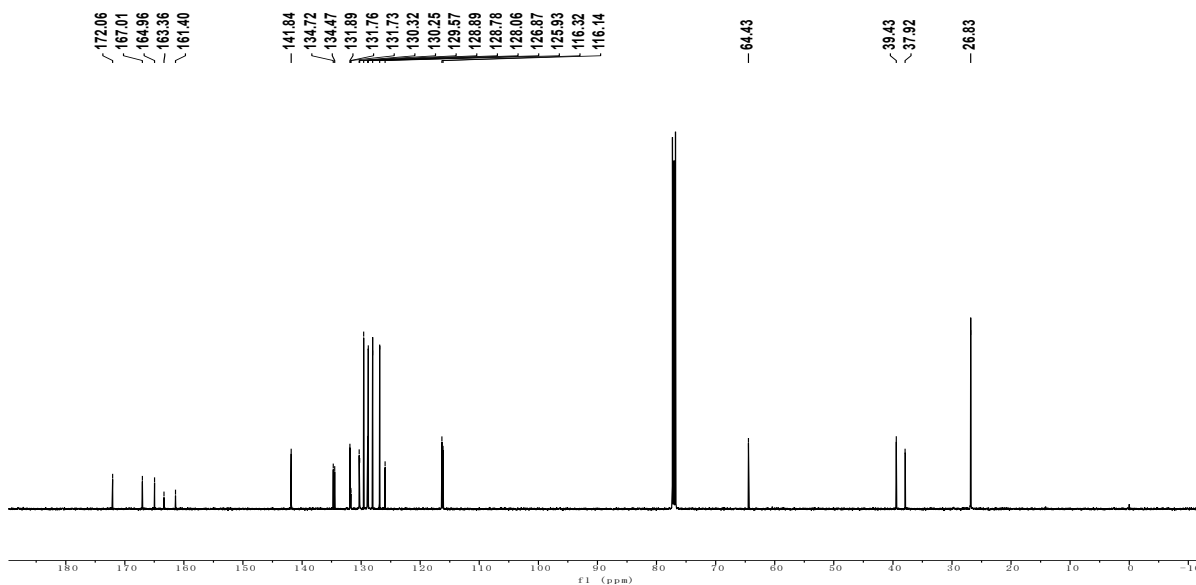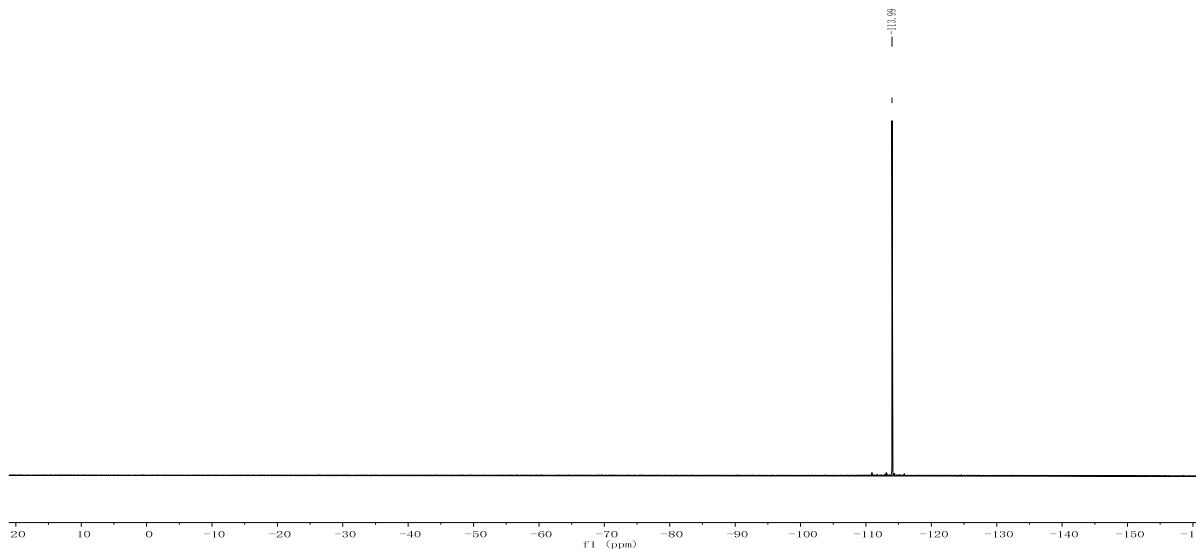

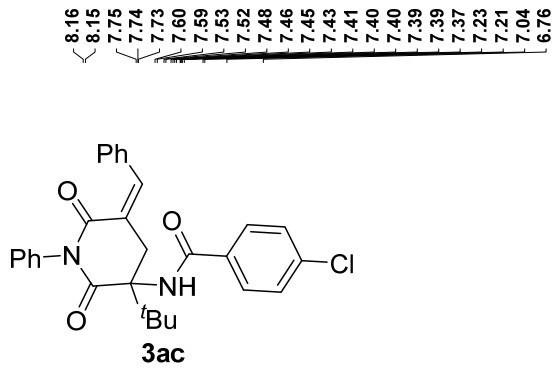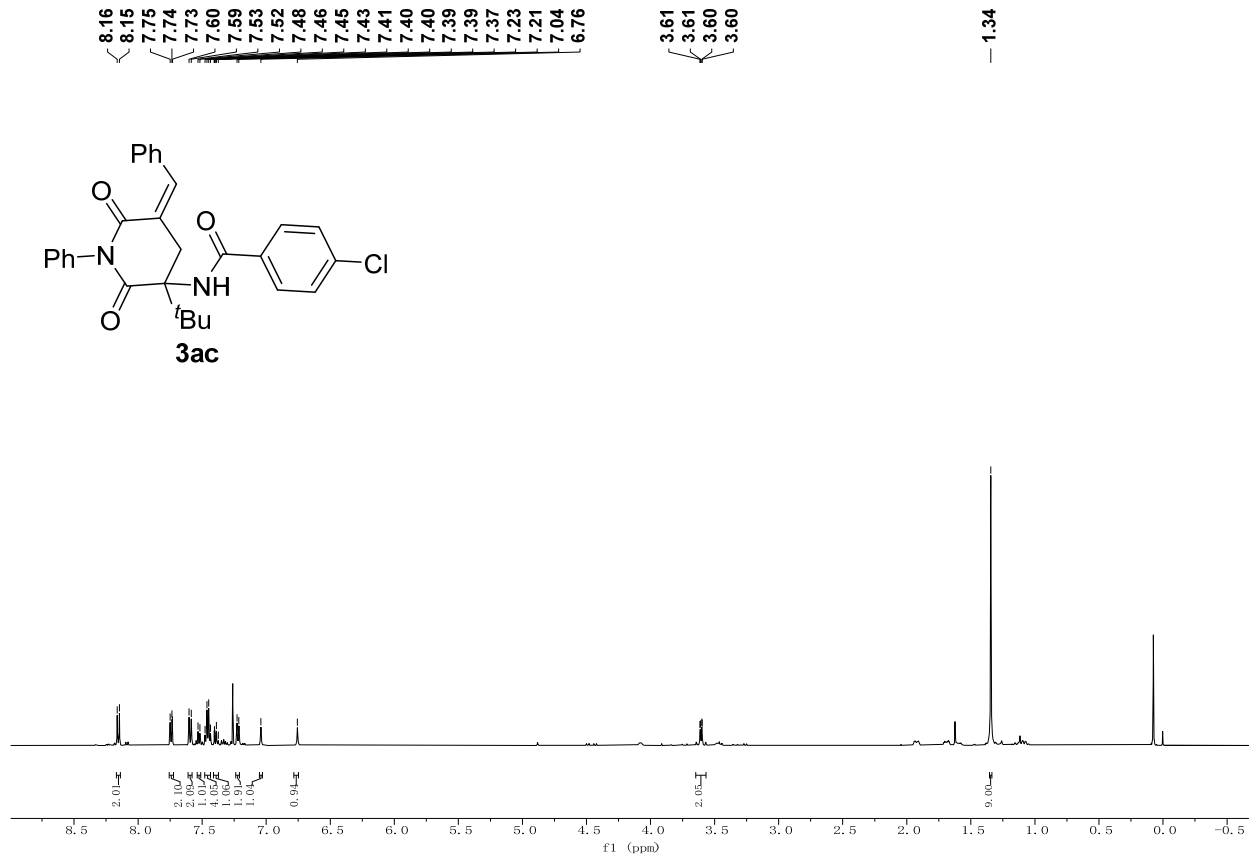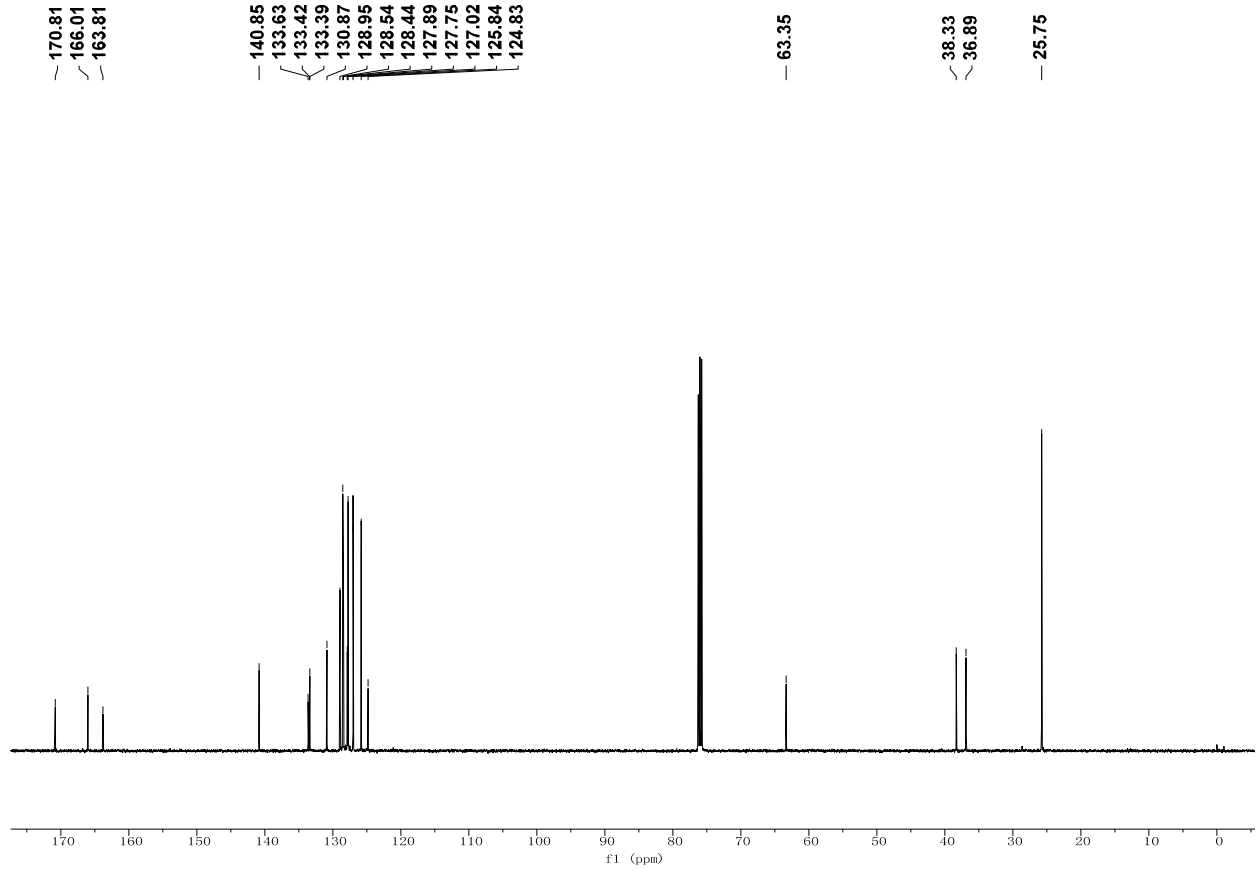

7.62  
7.60  
7.58  
7.56  
7.54  
7.53  
7.48  
7.46  
7.45  
7.40  
7.39  
7.37  
7.33  
7.32  
7.30  
7.28  
7.22  
7.21  
7.08  
6.82

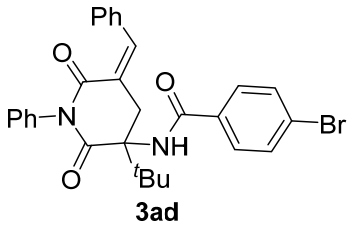

— 3.68

— 1.32

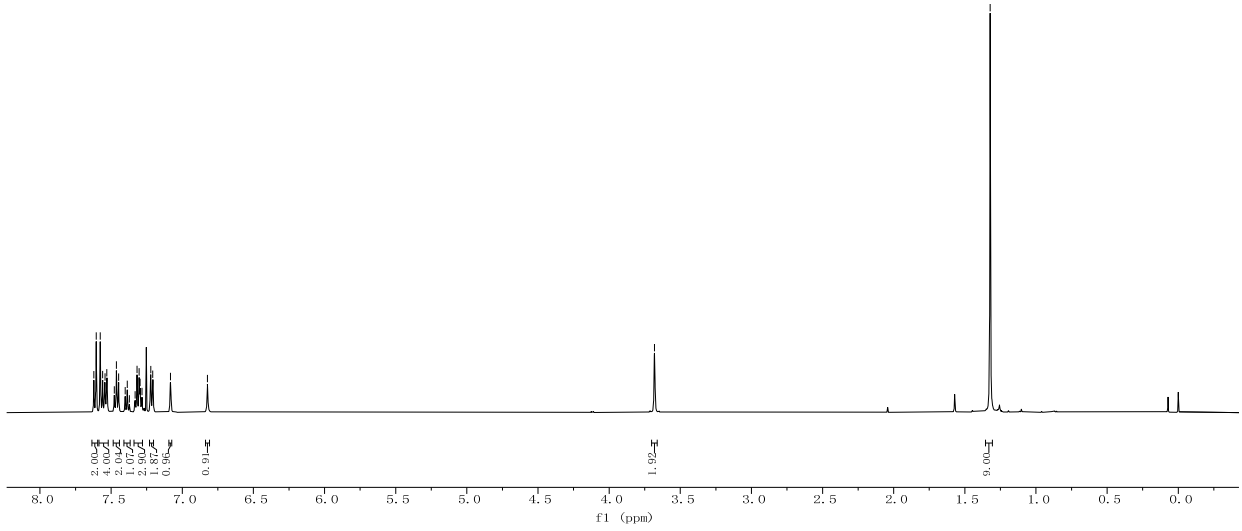

172.26  
165.92  
164.76  
142.18  
135.84  
134.68  
133.47  
131.99  
129.68  
129.34  
128.95  
128.63  
128.53  
128.40  
128.07  
126.54  
125.75

— 64.77

39.80  
37.83

— 26.99

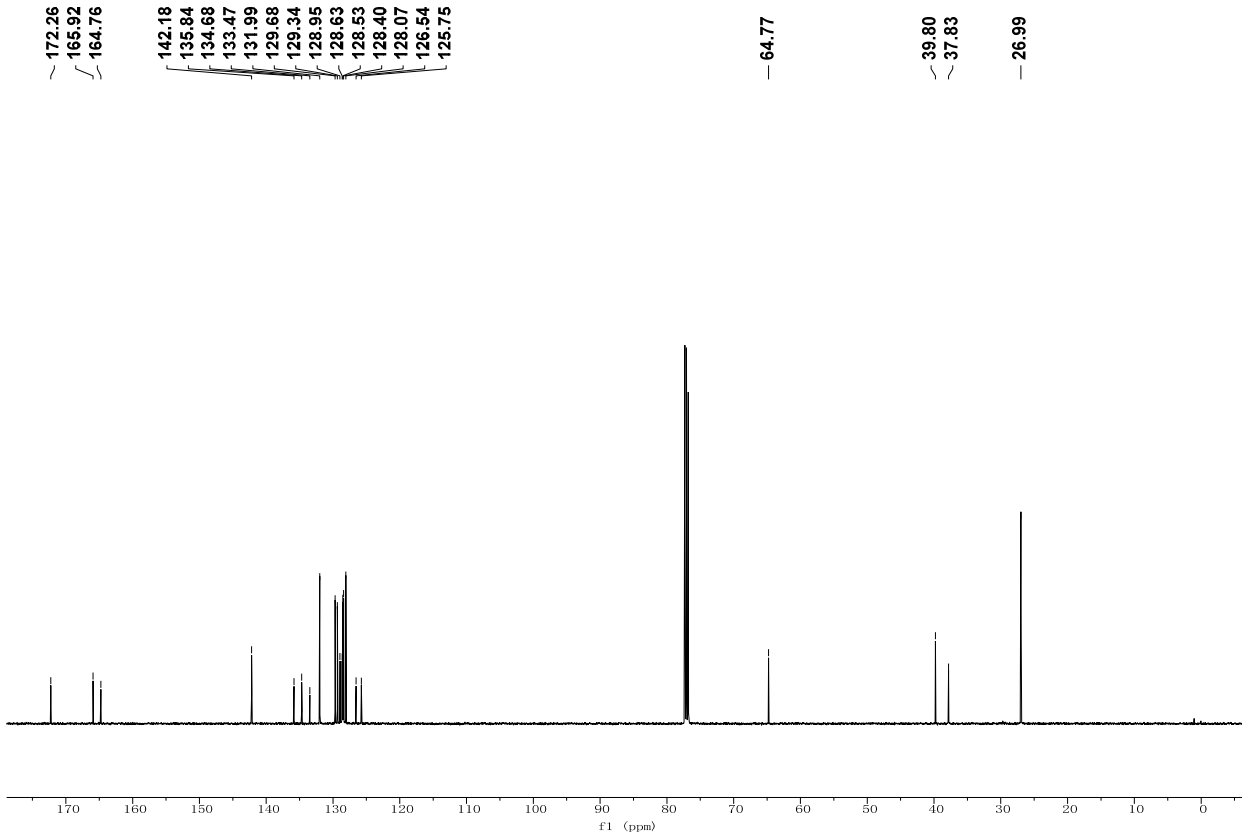

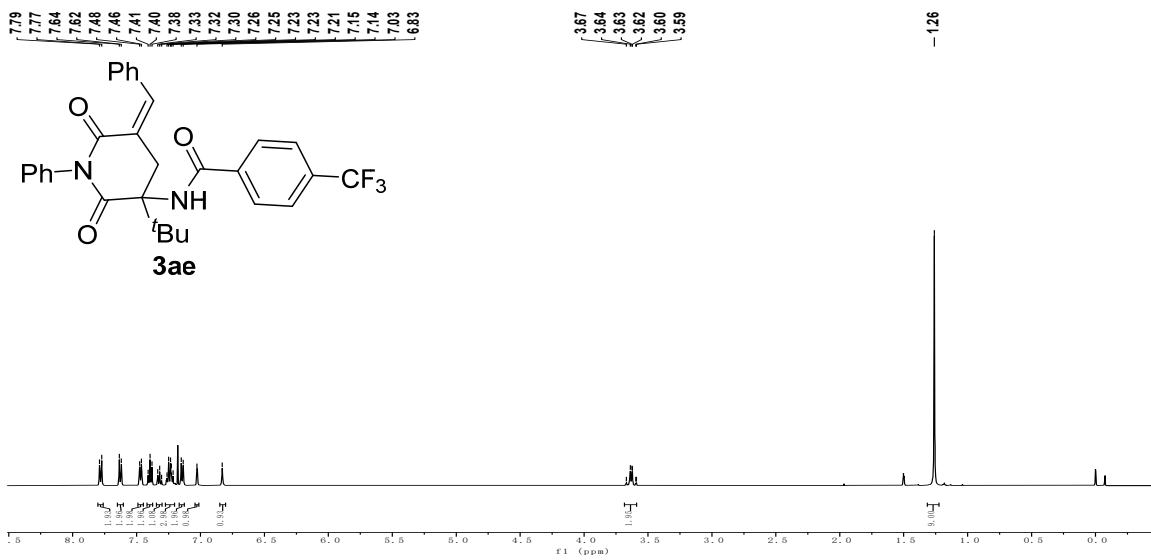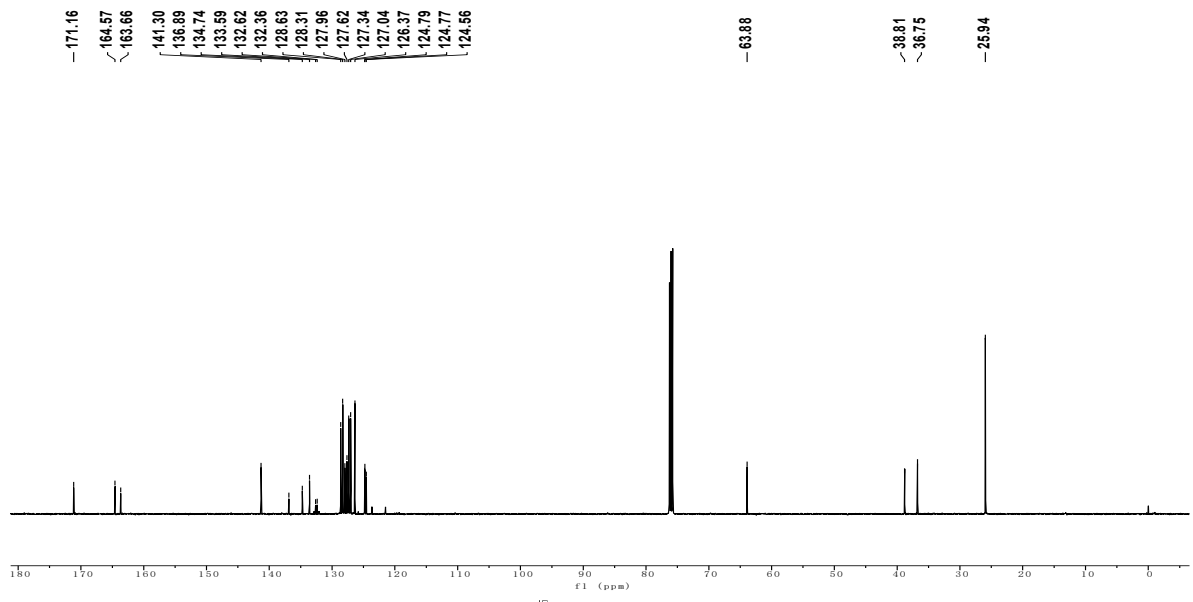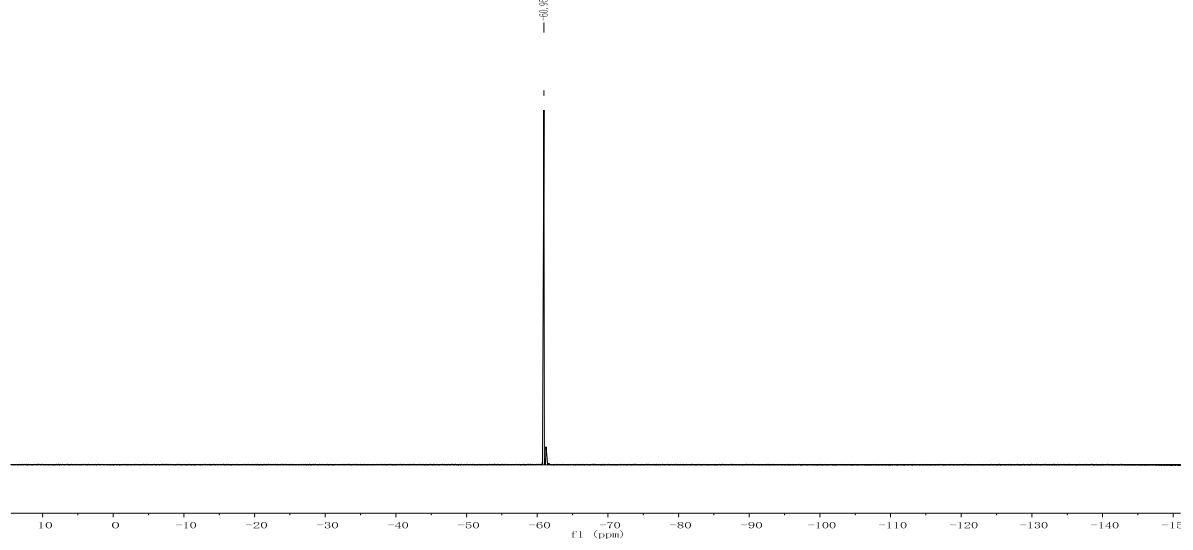

7.77  
7.76  
7.67  
7.65  
7.47  
7.46  
7.41  
7.40  
7.38  
7.34  
7.33  
7.33  
7.32  
7.32  
7.31  
7.31  
7.30  
7.26  
7.25  
7.25  
7.24  
7.23  
7.22  
7.14  
7.13  
7.03  
6.83  
3.66  
3.63  
3.61  
3.60  
3.58  
3.57

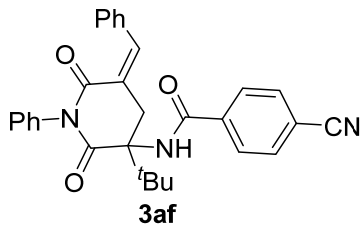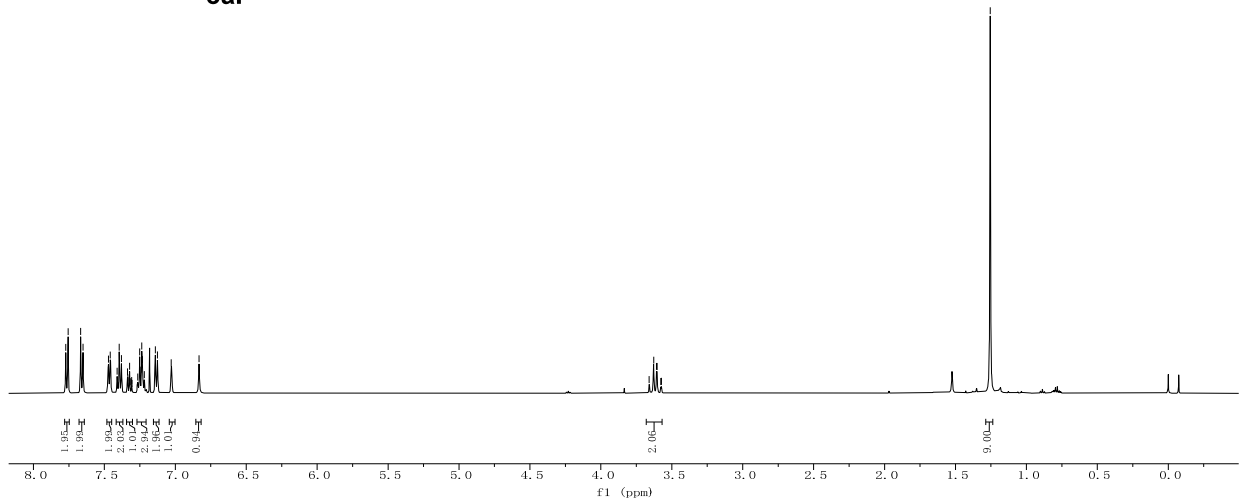

172.15  
165.11  
164.62  
142.49  
138.53  
135.72  
134.58  
132.62  
129.68  
129.36  
129.06  
128.71  
128.35  
128.10  
127.65  
125.45  
117.91  
115.43

65.05

39.89  
37.72

27.00

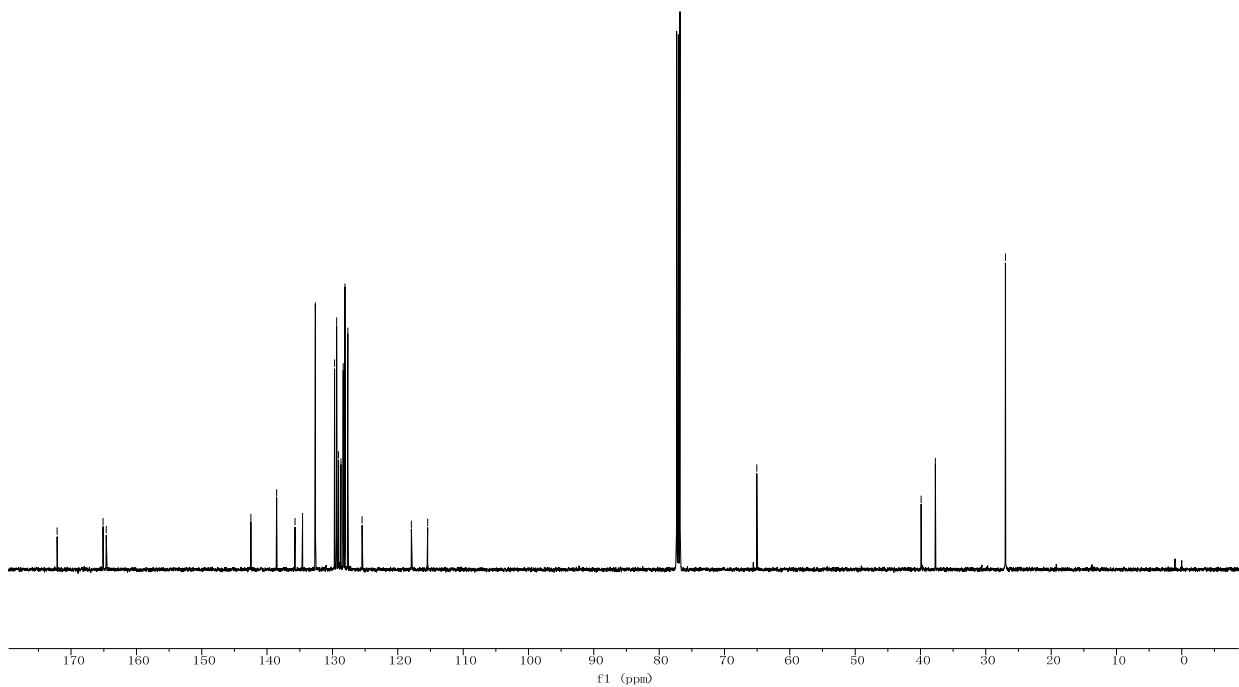

7.53  
7.48  
7.46  
7.43  
7.42  
7.40  
7.38  
7.34  
7.33  
7.31  
7.27  
7.25  
7.24  
7.23  
7.22  
7.14  
7.13  
7.04  
6.75

3.67  
3.64  
3.59  
3.58  
3.56  
3.55

1.26

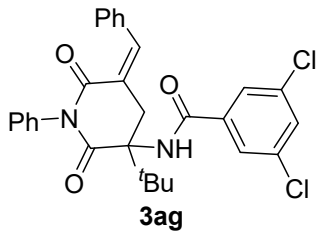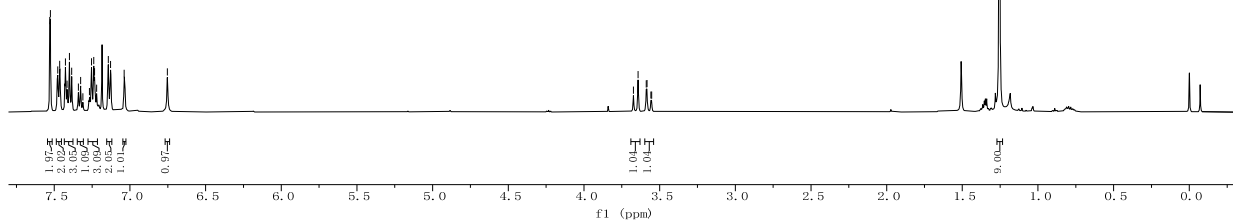

172.16  
164.60  
164.29  
142.55  
137.49  
135.72  
135.69  
134.59  
131.72  
129.69  
129.36  
129.04  
128.69  
128.35  
128.08  
125.55  
125.45

65.04

39.91  
37.70

27.03

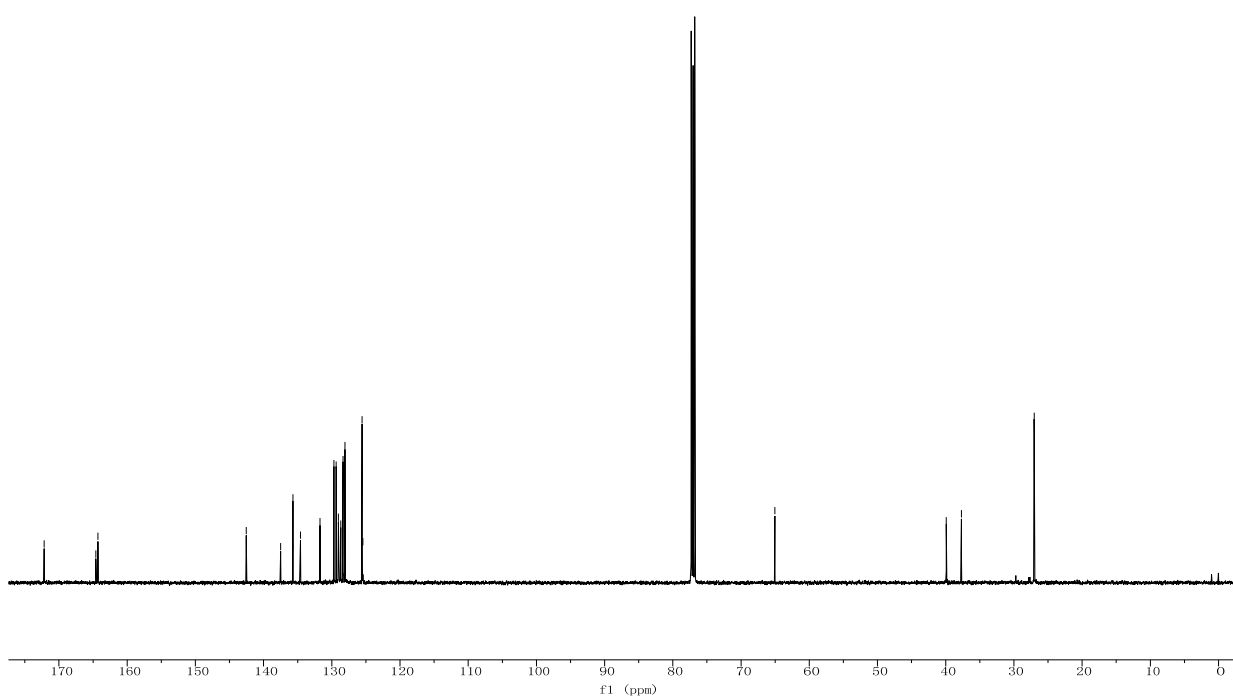

7.55  
7.54  
7.47  
7.45  
7.44  
7.39  
7.37  
7.37  
7.36  
7.33  
7.33  
7.32  
7.30  
7.30  
7.29  
7.28  
7.23  
7.22  
7.20  
7.19  
7.05  
6.30

3.80  
3.80  
3.77  
3.77  
3.47  
3.44

2.43

1.31

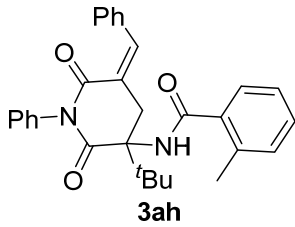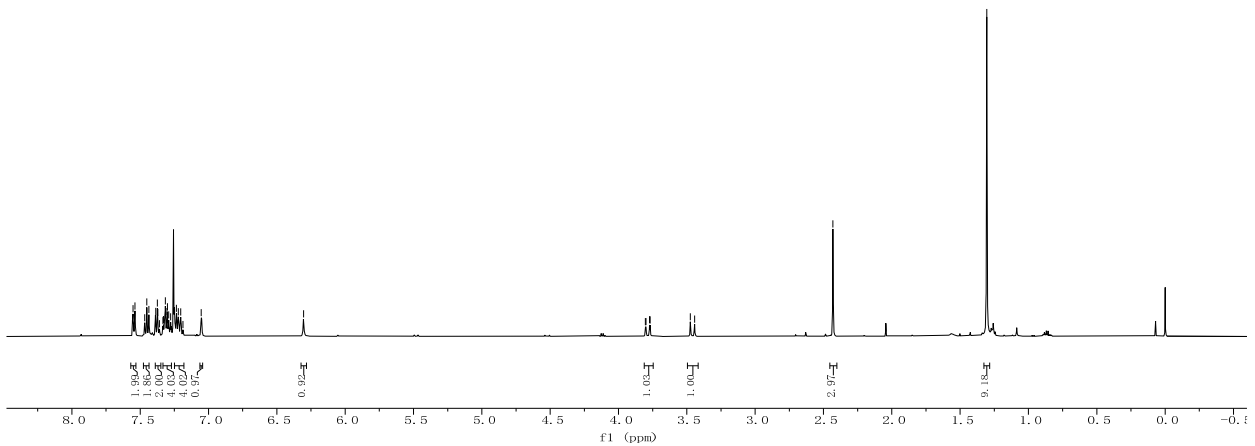

171.30  
165.75  
163.84

141.25  
140.82  
134.91  
133.75  
130.75  
128.61  
128.33  
128.23  
127.78  
127.47  
127.42  
126.88  
125.85  
124.99

63.51

38.69  
36.91

25.92  
20.43

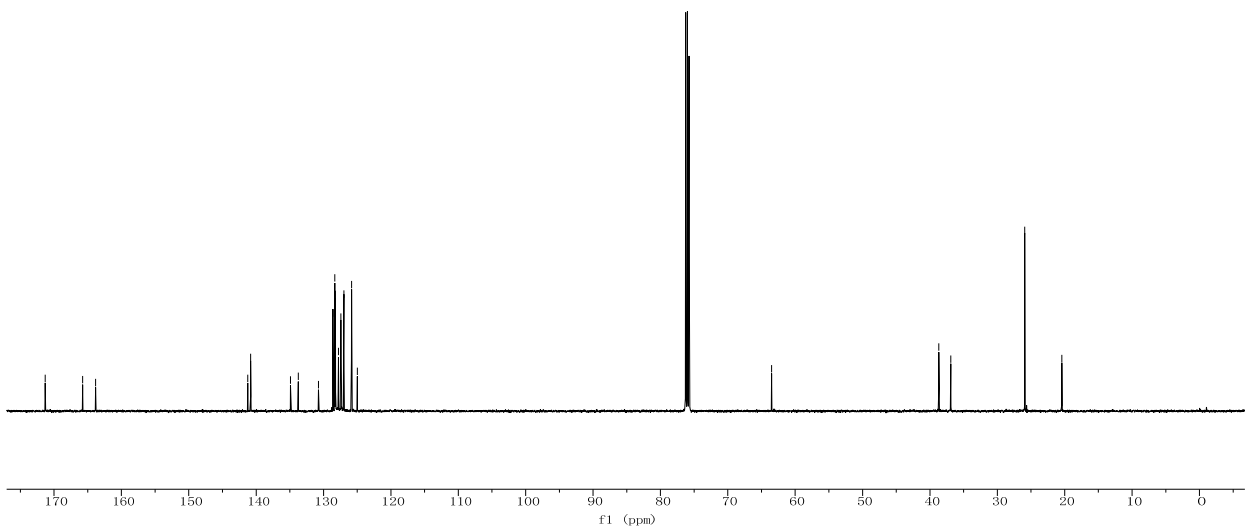



7.56  
7.55  
7.53  
7.52  
7.51  
7.47  
7.46  
7.44  
7.39  
7.38  
7.36  
7.33  
7.32  
7.31  
7.30  
7.28  
7.24  
7.22  
7.07  
6.83

3.72  
3.71  
3.69  
3.68  
3.67  
3.64

— 2.38

— 1.33

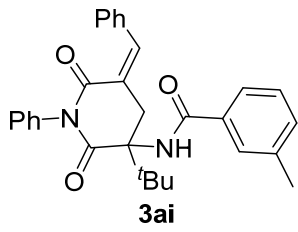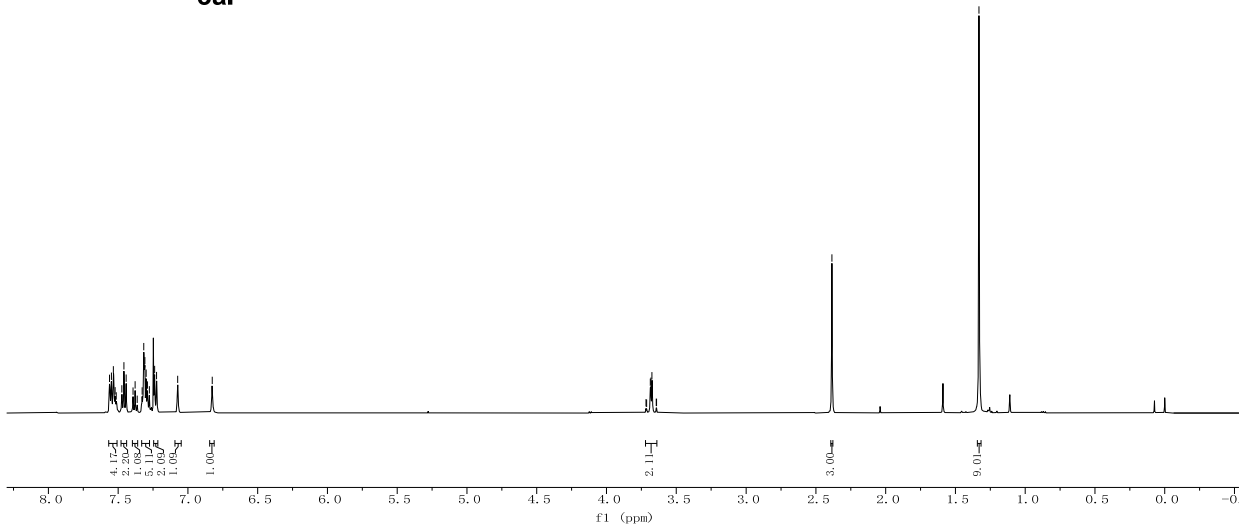

172.30  
167.11  
164.91  
141.90  
138.70  
135.96  
134.79  
134.65  
132.56  
129.68  
129.29  
128.86  
128.62  
128.55  
128.48  
128.05  
127.67  
126.02  
123.81

— 64.62

39.74  
37.96

— 26.99  
— 21.40

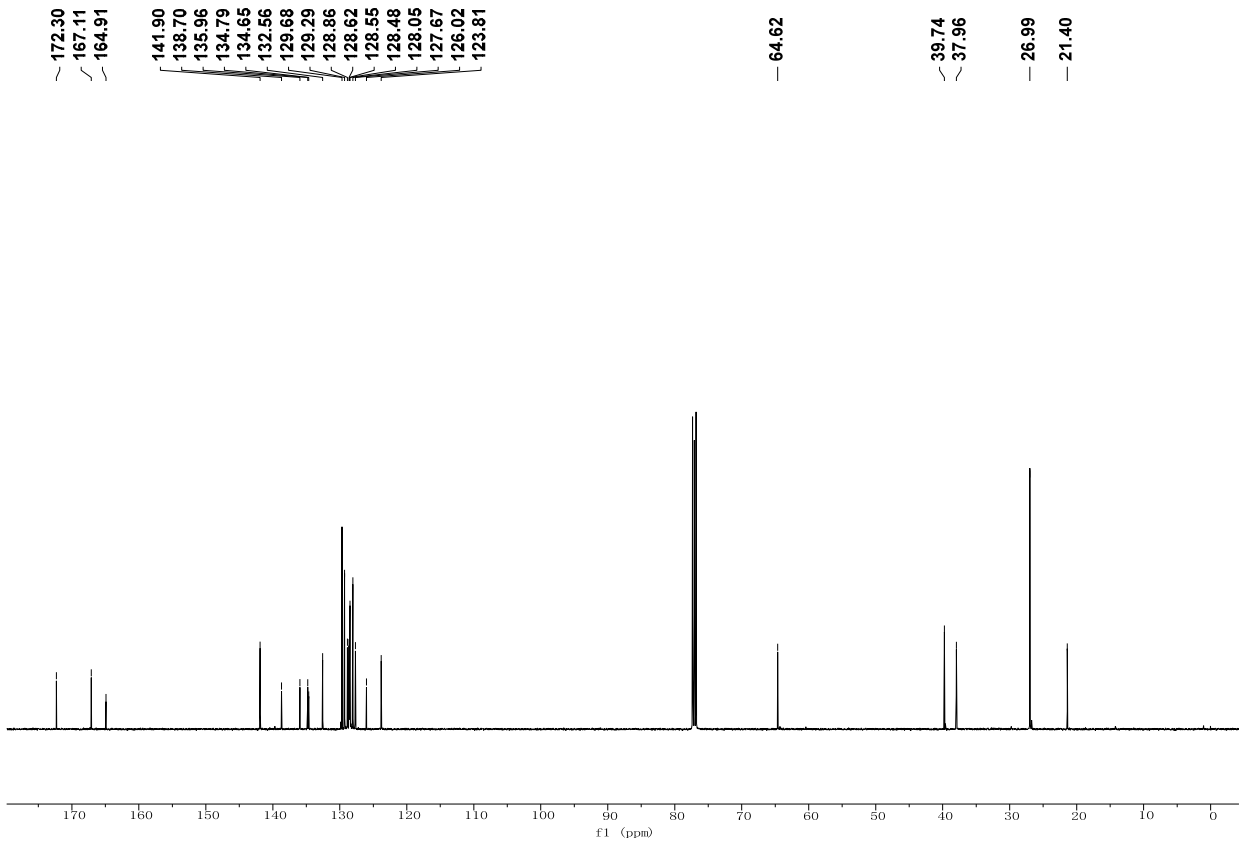

7.65  
7.64  
7.54  
7.53  
7.47  
7.46  
7.44  
7.39  
7.38  
7.36  
7.33  
7.31  
7.30  
7.29  
7.27  
7.25  
7.24  
7.22  
7.07  
6.81

3.69  
3.68  
3.65

2.39

1.33

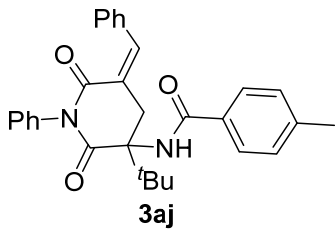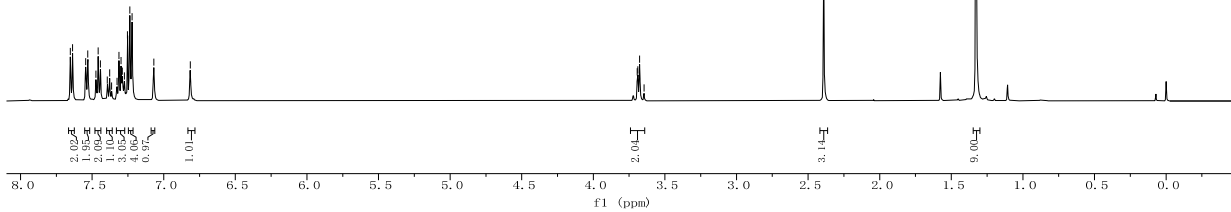

172.36  
166.80  
164.90  
142.31  
141.87  
135.96  
134.80  
131.80  
129.66  
129.38  
129.28  
128.83  
128.53  
128.47  
128.03  
126.90  
126.05

64.56

39.74  
37.96

26.98  
21.49

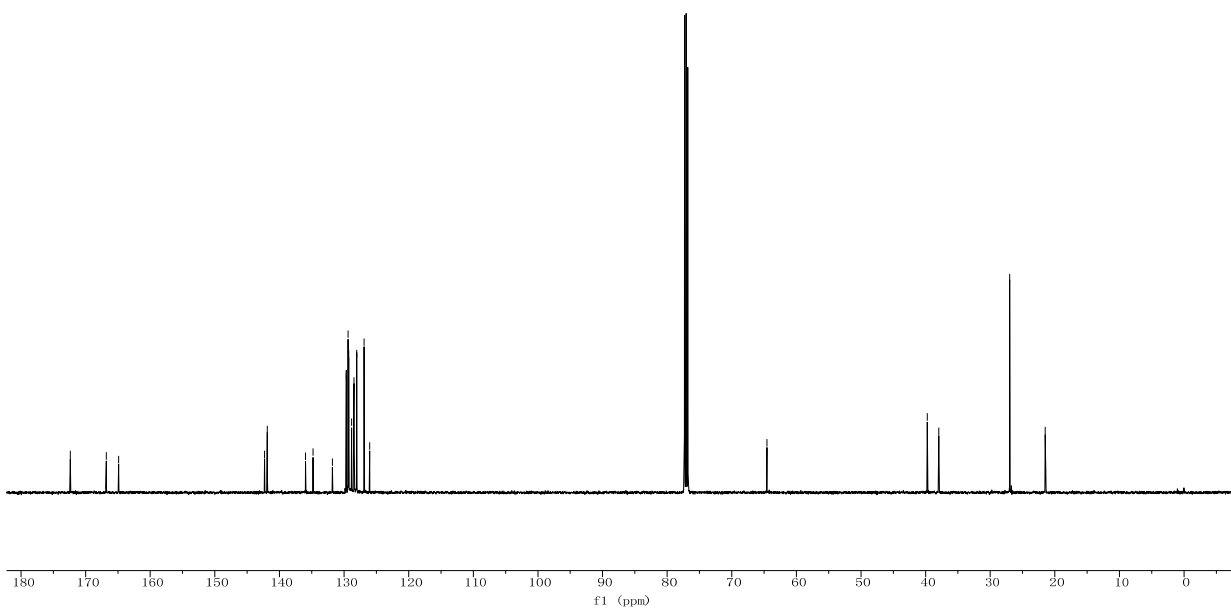



7.61  
7.59  
7.47  
7.46  
7.40  
7.39  
7.37  
7.32  
7.31  
7.29  
7.25  
7.24  
7.22  
7.20  
7.19  
7.18  
7.17  
7.16  
7.15  
6.99  
6.75

3.65  
3.64  
3.62  
3.61  
3.60  
3.56

2.64  
2.62  
2.61  
2.59

1.25  
1.18  
1.17  
1.15

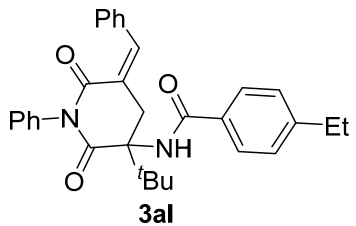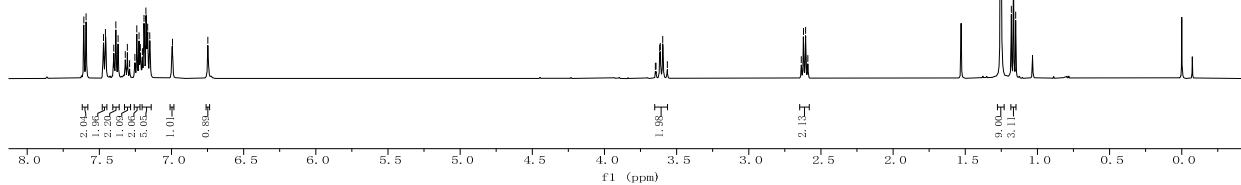

171.30  
165.79  
163.86

147.52  
140.81  
134.93  
133.76  
130.99  
128.61  
128.23  
127.78  
127.48  
127.43  
127.17  
126.98  
125.97  
125.02

63.52

36.93

27.76  
25.93

14.32

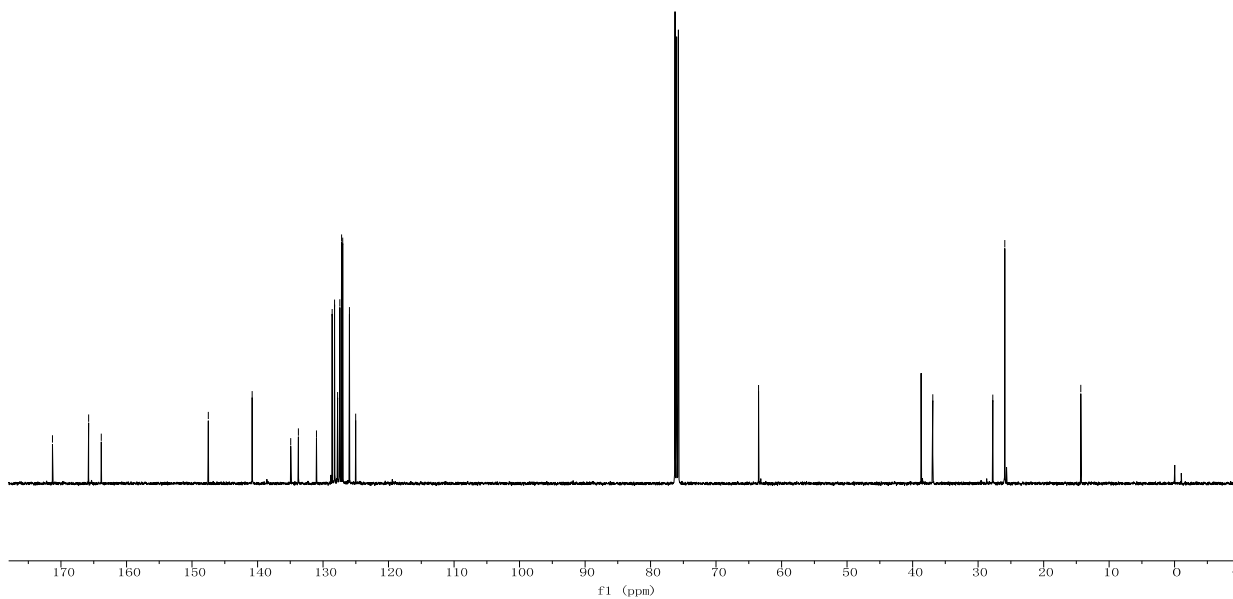

8.22  
8.20  
7.86  
7.84  
7.82  
7.80  
7.74  
7.73  
7.50  
7.48  
7.43  
7.41  
7.39  
7.34  
7.33  
7.26  
7.24  
7.22  
7.05  
6.96

— 3.69

— 1.31

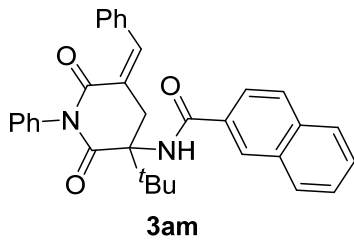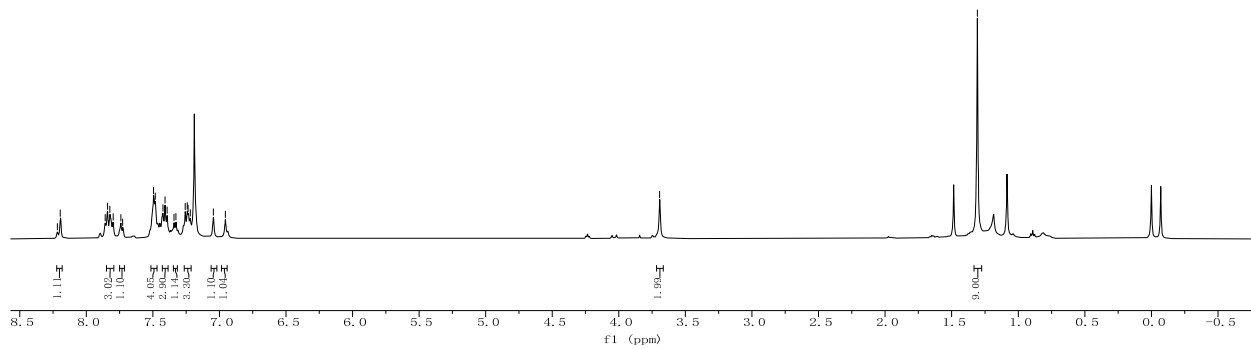

171.25  
165.85  
163.87  
140.90  
134.90  
133.60  
132.31  
131.84  
131.36  
130.77  
128.71  
128.24  
127.71  
127.51  
127.46  
127.43  
126.56  
126.38  
125.93  
125.85  
125.73  
125.10

— 63.62

— 38.72  
— 36.97

— 25.94

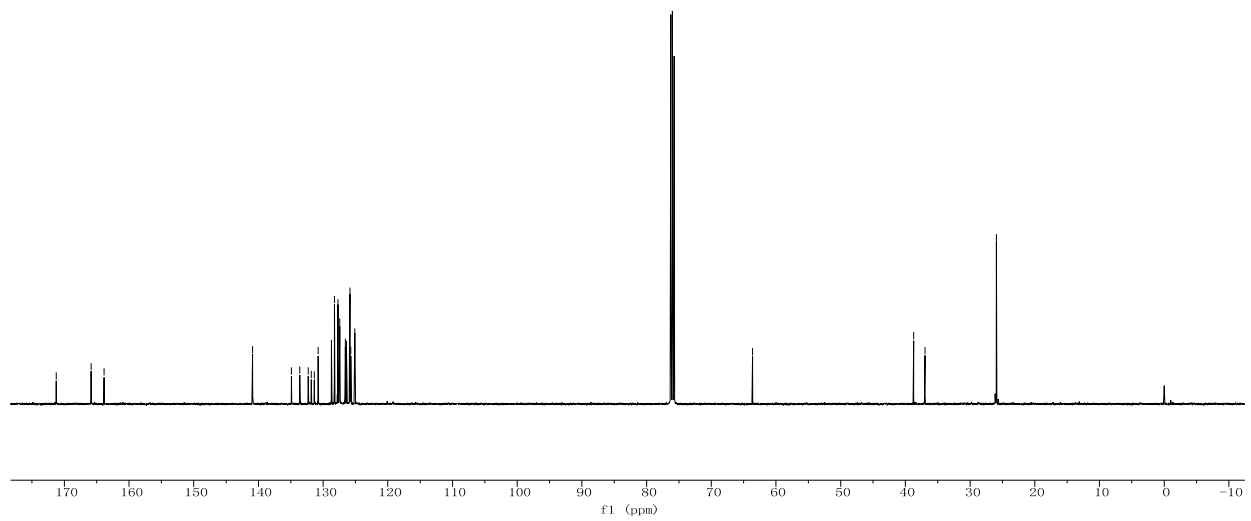

8.09  
8.08  
7.80  
7.80  
7.79  
7.78  
7.53  
7.52  
7.52  
7.51  
7.51  
7.50  
7.49  
7.48  
7.47  
7.46  
7.46  
7.45  
7.44  
7.43  
7.42  
7.24  
7.23  
7.22  
7.17  
4.14  
4.11  
3.47  
3.47  
3.44  
3.44  
-1.74

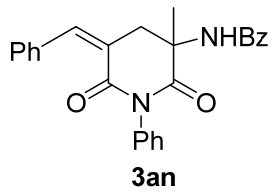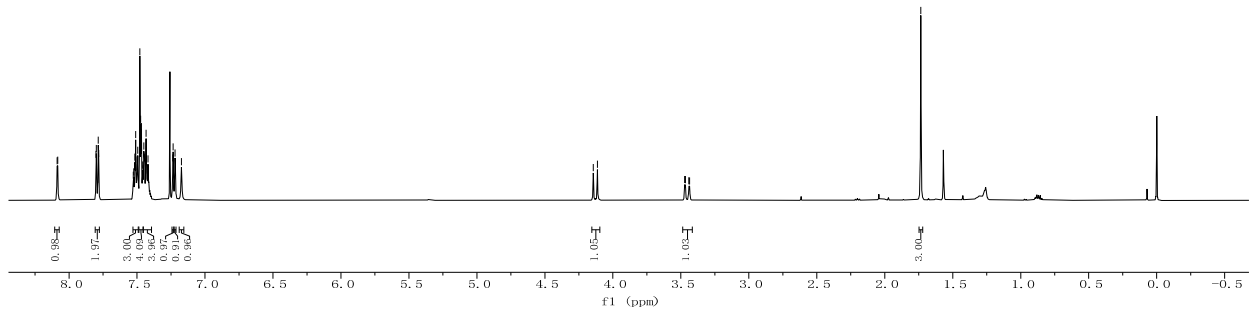

174.38  
166.99  
165.98  
142.92  
135.58  
134.35  
134.16  
131.93  
129.99  
129.62  
129.37  
128.87  
128.78  
128.67  
128.27  
127.04  
125.09  
57.06  
33.35  
23.27

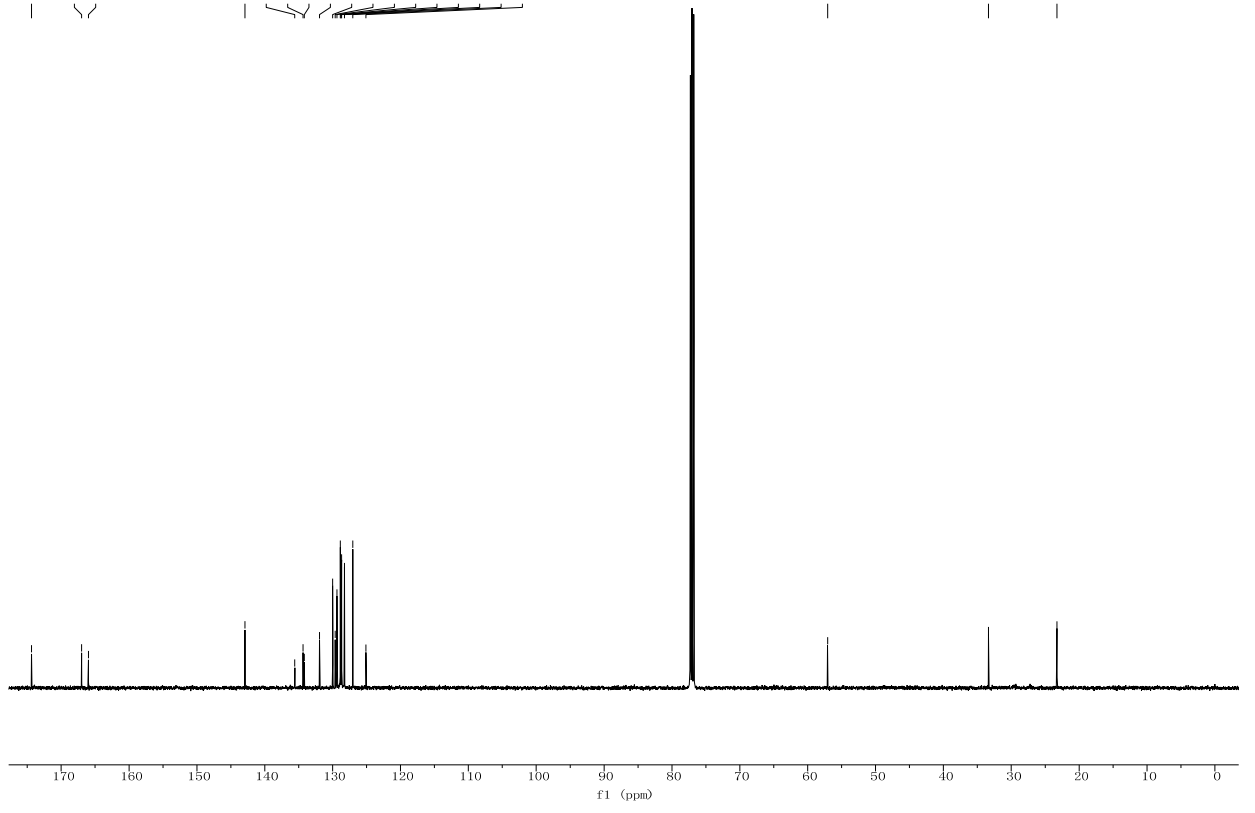

8.10  
8.09  
7.82  
7.81  
7.54  
7.52  
7.51  
7.50  
7.49  
7.48  
7.47  
7.46  
7.44  
7.43  
7.42  
7.36  
7.21  
7.19

4.46  
4.45  
4.43  
4.42

3.33  
3.33  
3.30  
3.30  
2.56  
2.55  
2.53  
2.52  
2.50  
2.49  
2.00  
1.98  
1.97  
1.95  
1.94  
1.92  
0.92  
0.91  
0.89

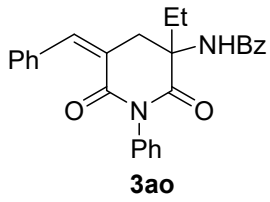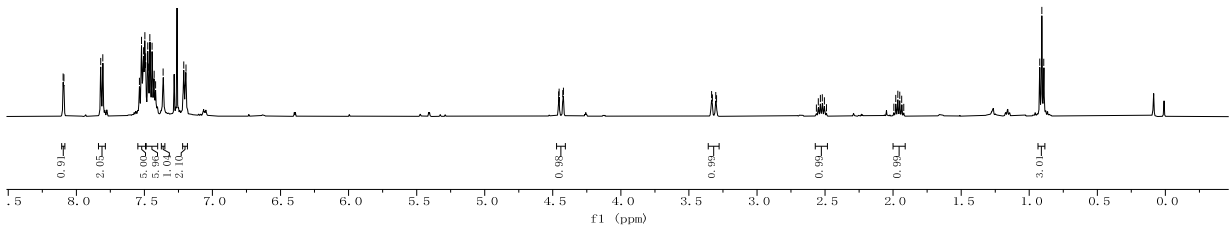

165.70  
164.89  
141.95  
134.55  
133.34  
133.28  
130.85  
129.00  
128.67  
128.41  
127.87  
127.80  
127.67  
127.27  
125.94  
123.80  
119.96

59.71

31.67  
27.19

7.18

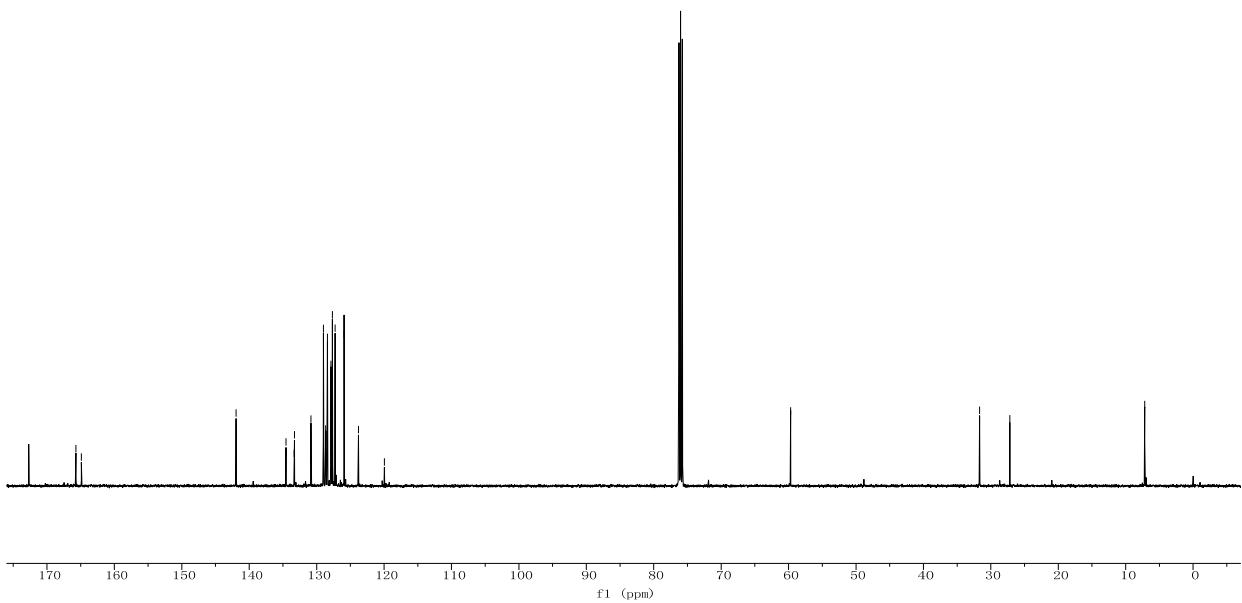

7.80  
7.79  
7.60  
7.59  
7.52  
7.51  
7.48  
7.47  
7.46  
7.45  
7.45  
7.43  
7.41  
7.40  
7.35  
7.33  
7.32  
7.30  
7.21  
7.18  
7.17  
7.00

3.93  
3.90  
3.63  
3.60  
3.60

2.54  
2.52  
2.51  
2.50  
2.48

1.28  
1.27  
1.15  
1.13

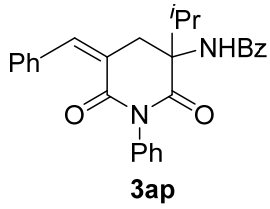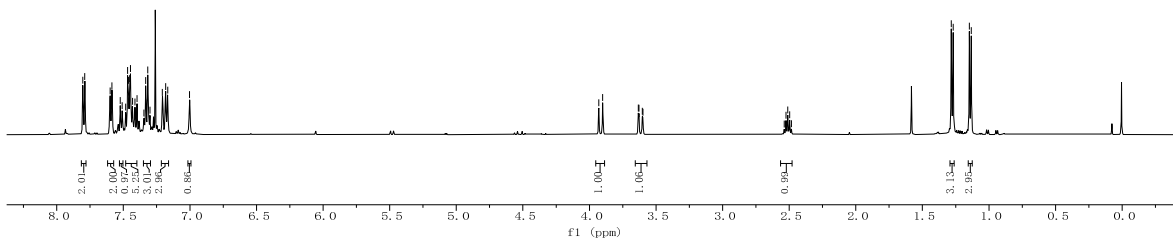

173.54  
167.27  
164.38

144.01  
135.53  
134.69  
134.57  
131.84  
129.94  
129.36  
129.09  
128.72  
128.68  
128.44  
128.03  
126.98  
124.49

63.15

37.33  
34.48

17.66  
17.34

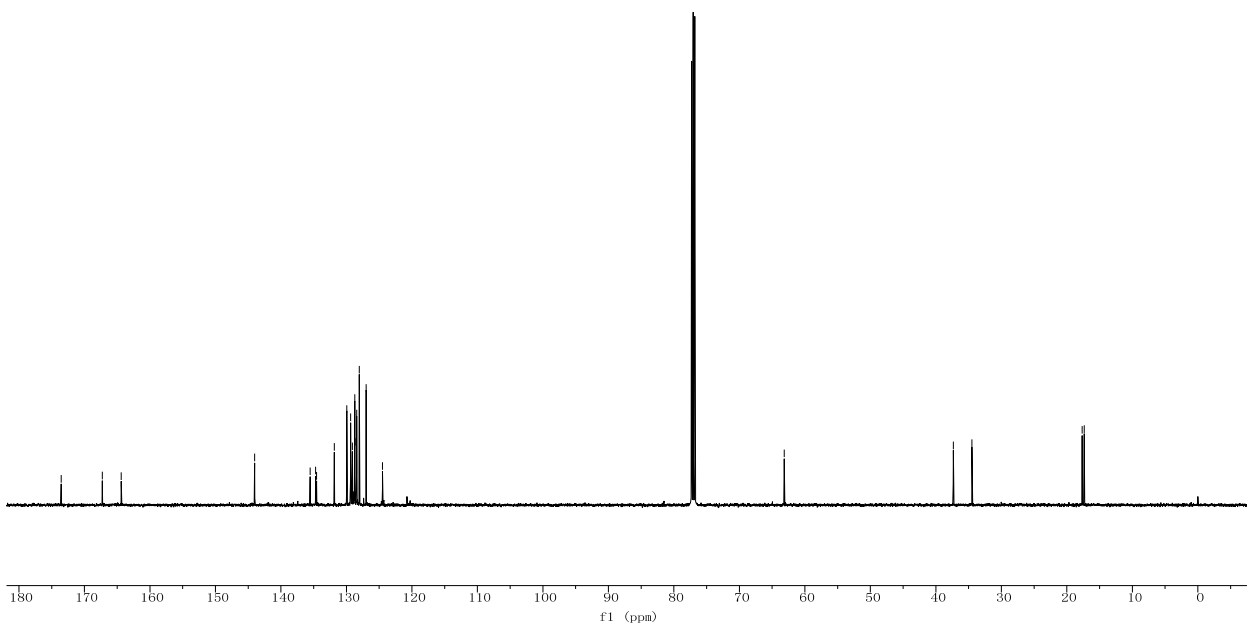



8.21  
7.88  
7.81  
7.80  
7.80  
7.55  
7.53  
7.51  
7.45  
7.43  
7.42  
7.35  
7.34  
7.34  
7.34  
7.33  
7.31  
7.30  
7.14  
7.13  
7.11  
7.02  
7.01  
5.81  
5.79  
5.19  
5.17  
5.10  
5.07

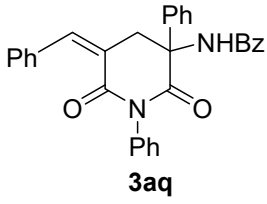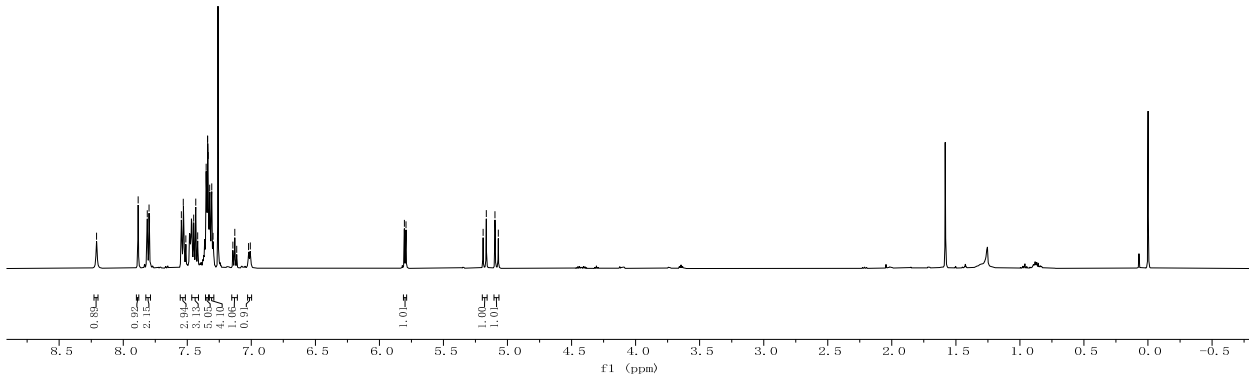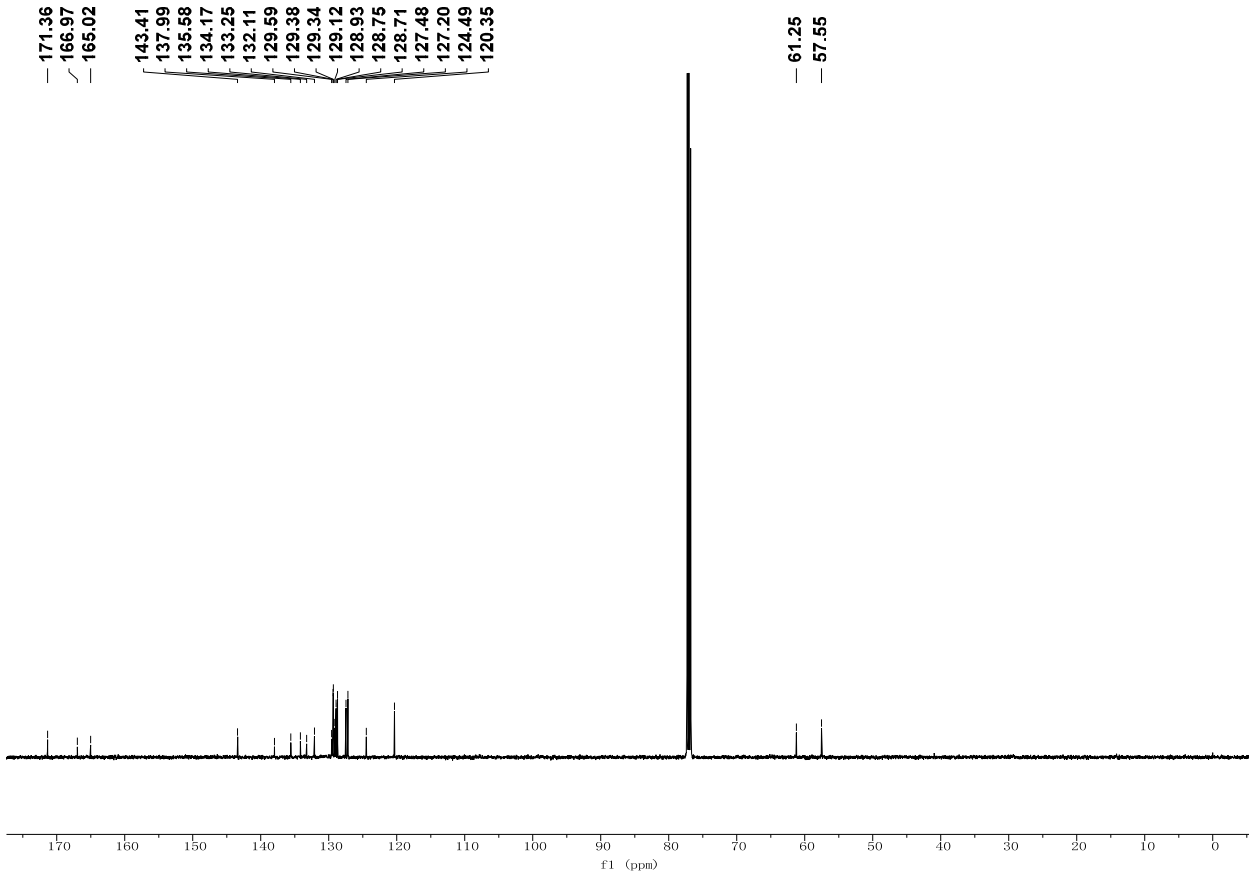

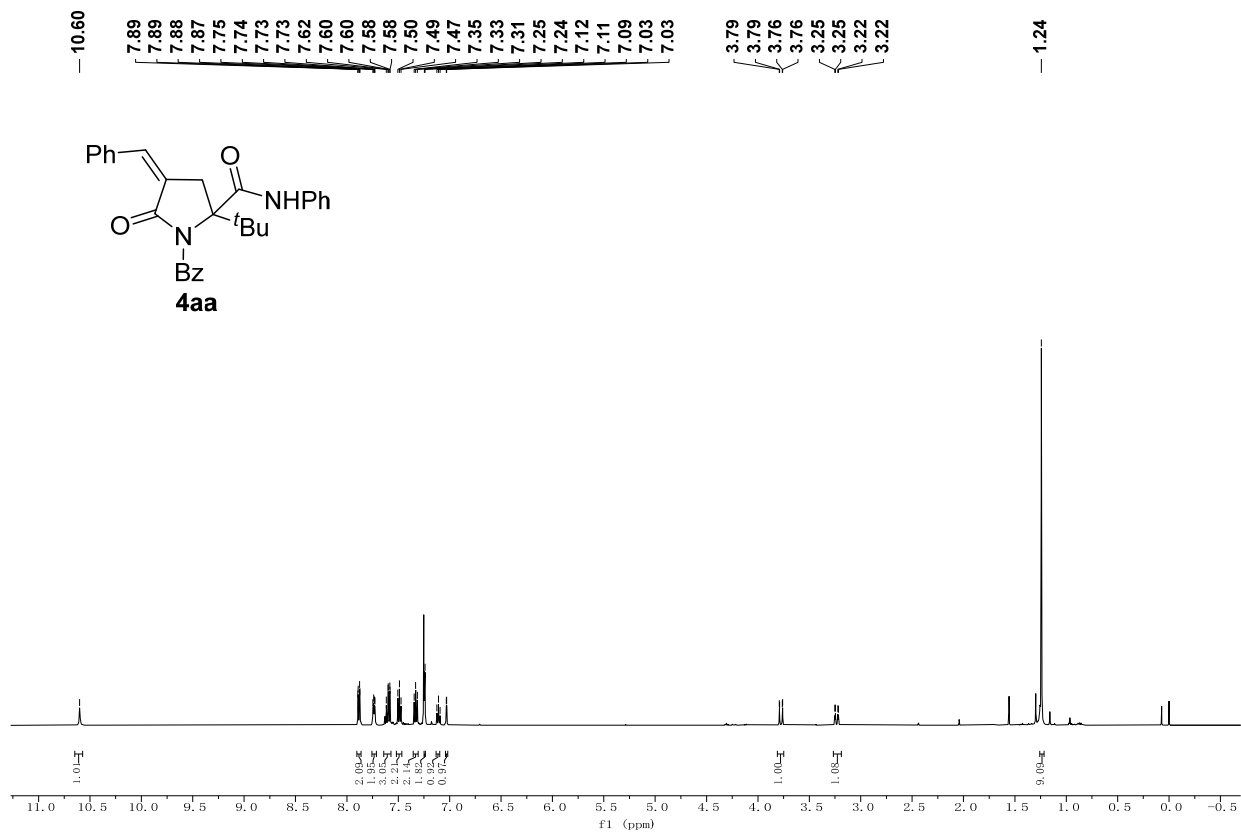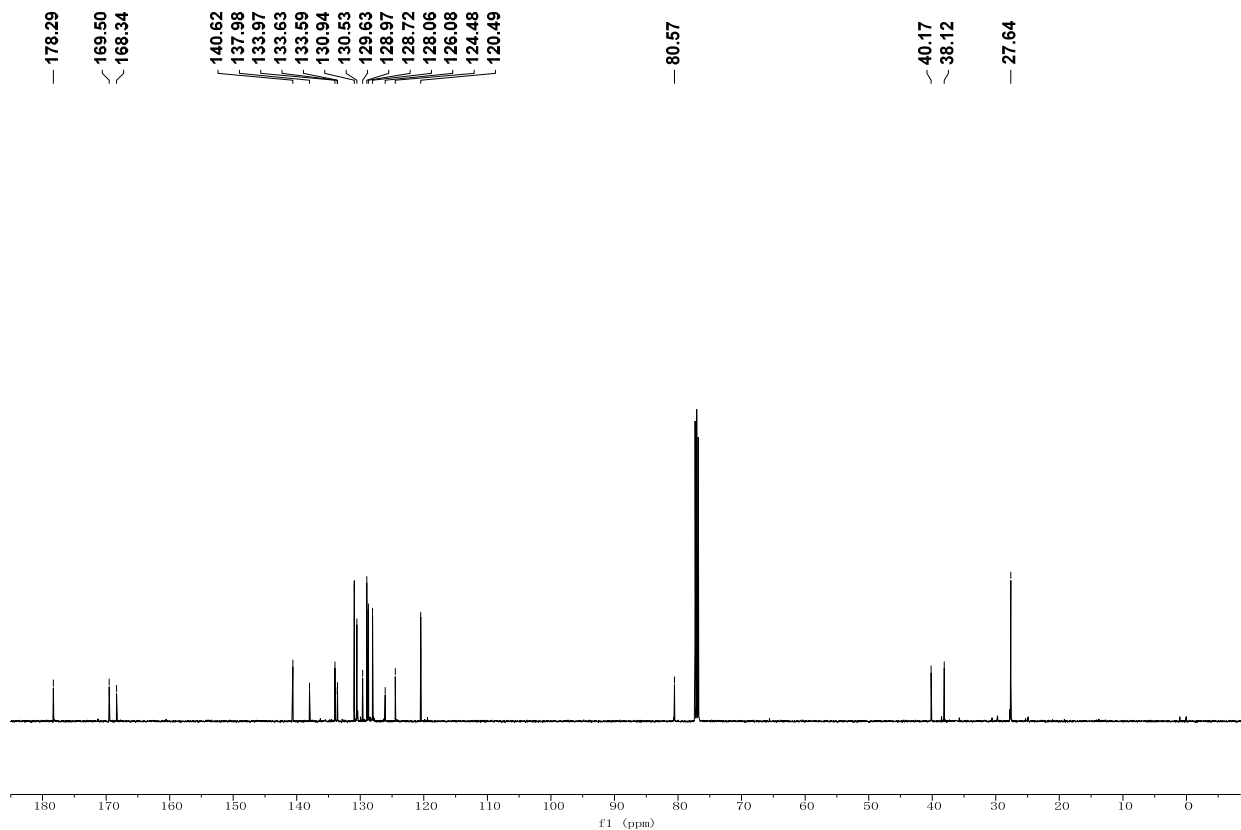

8.42  
8.12  
8.11  
8.11  
7.76  
7.75  
7.75  
7.74  
7.58  
7.56  
7.55  
7.54  
7.54  
7.53  
7.53  
7.52  
7.49  
7.48  
7.48  
7.47  
7.46  
7.45  
7.42  
7.41  
7.39  
7.15  
7.13  
7.13  
5.56

— 1.66  
— 1.10

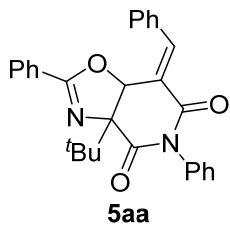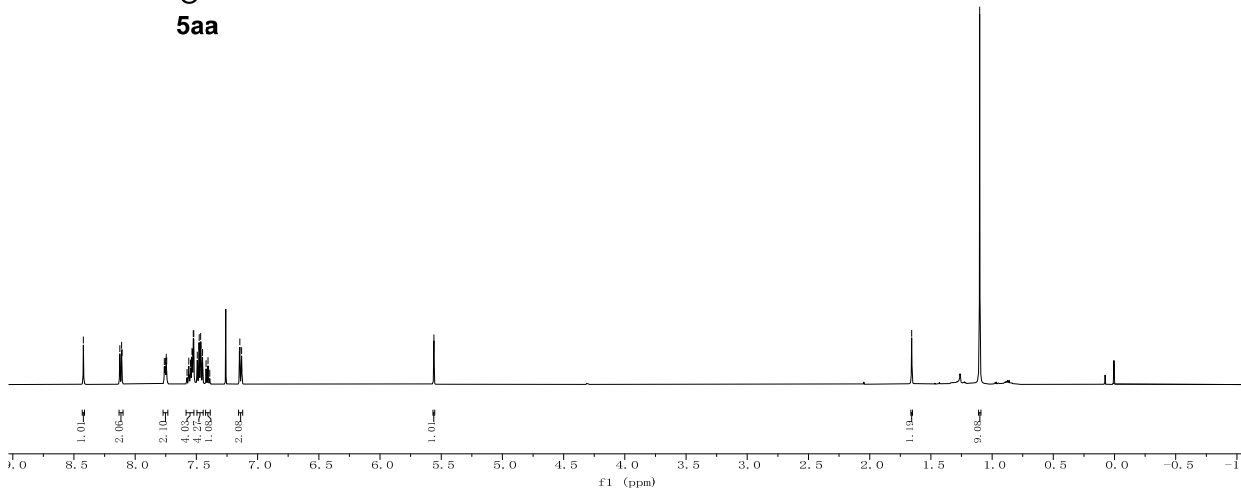

— 170.35  
— 164.48  
— 164.25

— 149.43  
— 135.90  
— 133.35  
— 132.20  
— 130.96  
— 130.44  
— 129.26  
— 129.23  
— 128.85  
— 128.60  
— 128.51  
— 128.37  
— 126.87  
— 122.30

— 81.17  
— 75.95

— 36.99  
— 26.45

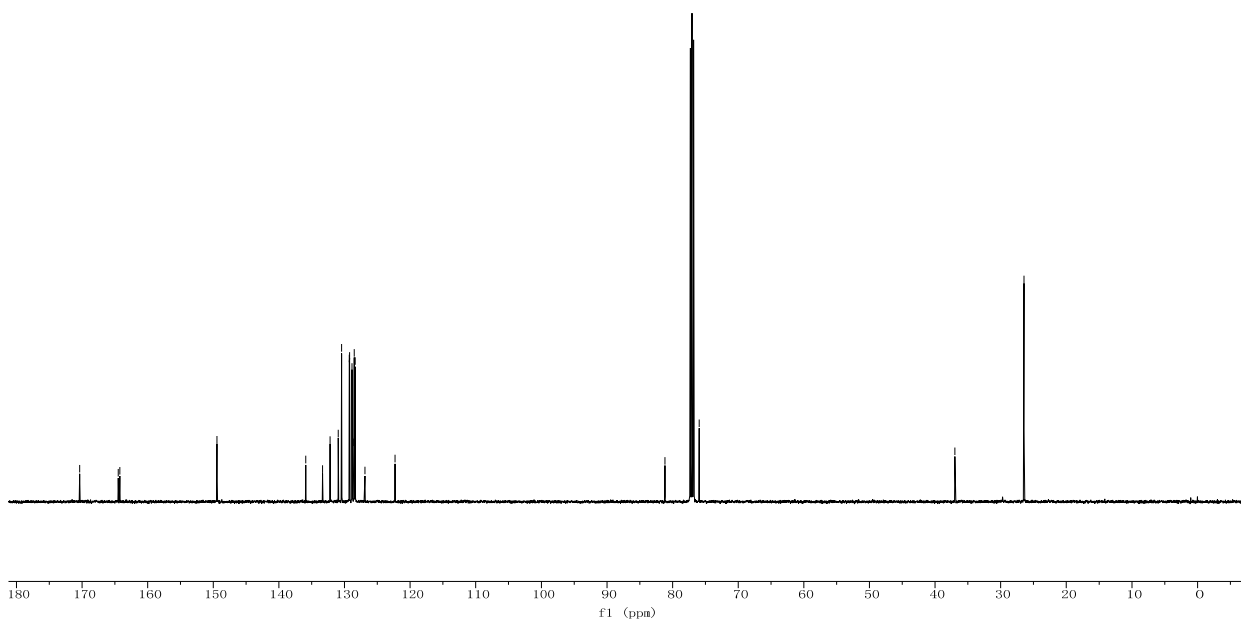

### HPLC chromatogram of racemic 3aa

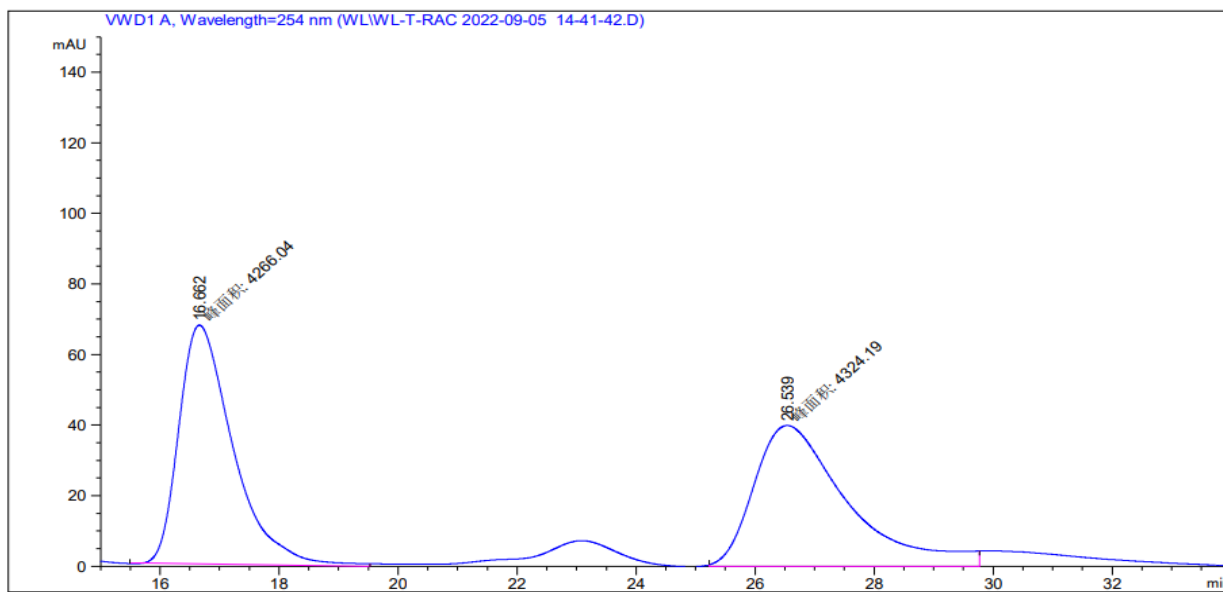

| 峰 # | 保留时间 [min] | 类型 | 峰宽 [min] | 峰面积 [mAU*s] | 峰高 [mAU] | 峰面积 %   |
|-----|------------|----|----------|-------------|----------|---------|
| 1   | 16.662     | MM | 1.0510   | 4266.03613  | 67.64932 | 49.6615 |
| 2   | 26.539     | MM | 1.8075   | 4324.18701  | 39.87323 | 50.3385 |

### HPLC chromatogram of chiral 3aa

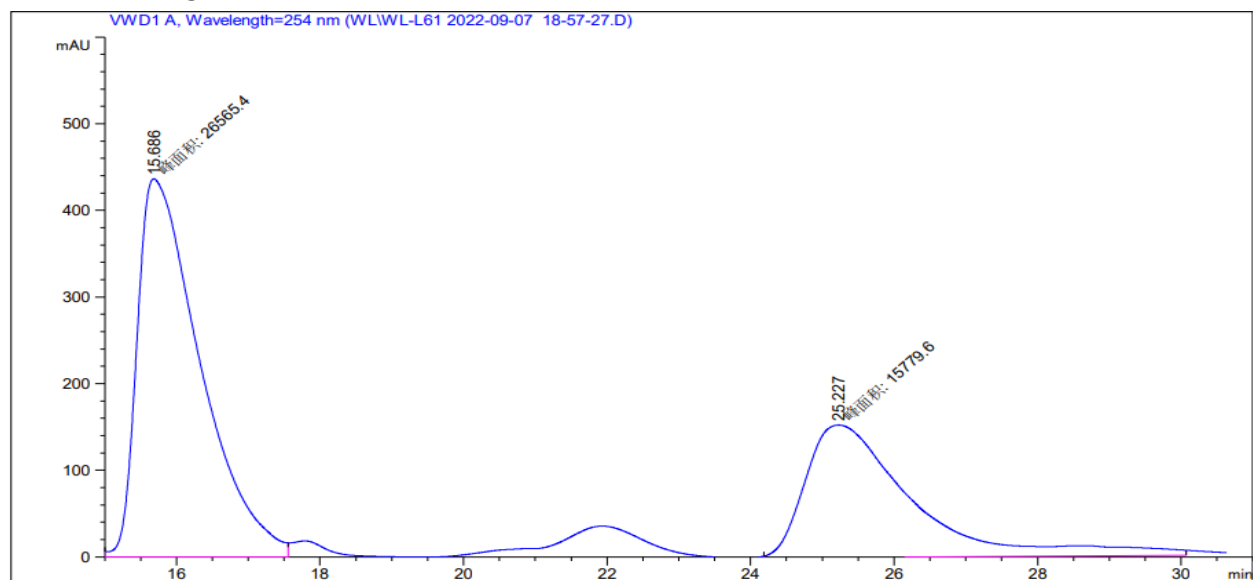

| 峰 # | 保留时间 [min] | 类型 | 峰宽 [min] | 峰面积 [mAU*s] | 峰高 [mAU]  | 峰面积 %   |
|-----|------------|----|----------|-------------|-----------|---------|
| 1   | 15.686     | MM | 1.0149   | 2.65654e4   | 436.26987 | 62.7356 |
| 2   | 25.227     | MM | 1.7226   | 1.57796e4   | 152.67024 | 37.2644 |

## X-ray Crystallographic Data of Product 3aa

Crystallographic data for **3aa** has been deposited with the Cambridge Crystallographic Data Centre as deposition number CCDC 2180470. These data can be obtained free of charge via [www.ccdc.cam.ac.uk/data\\_request/cif](http://www.ccdc.cam.ac.uk/data_request/cif), or by emailing [data\\_request@ccdc.cam.ac.uk](mailto:data_request@ccdc.cam.ac.uk), or by contacting The Cambridge Crystallographic Data Centre, 12, Union Road, Cambridge CB2 1EZ, UK; fax: +44 1223336033.

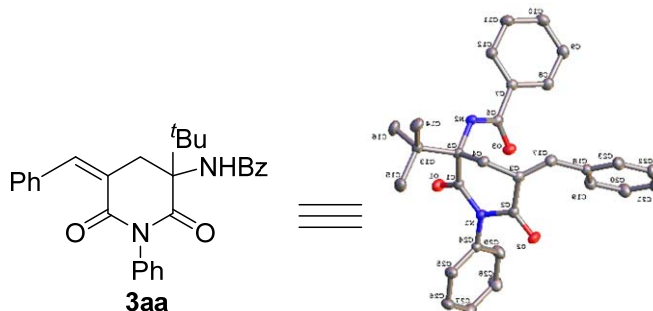

**Table S2. Crystal data and structure refinement for 3aa**

|                        |                                                               |                    |
|------------------------|---------------------------------------------------------------|--------------------|
| Identification code    | 2112299415_b_0m                                               |                    |
| Empirical formula      | C <sub>58</sub> H <sub>56</sub> N <sub>4</sub> O <sub>6</sub> |                    |
| Formula weight         | 905.06                                                        |                    |
| Temperature            | 213.00 K                                                      |                    |
| Wavelength             | 1.34139 Å                                                     |                    |
| Crystal system         | Monoclinic                                                    |                    |
| Space group            | P 1 21/c 1                                                    |                    |
| Unit cell dimensions   | a = 10.5983(2) Å                                              | a = 90°.           |
|                        | b = 42.7134(7) Å                                              | b = 107.8230(10)°. |
|                        | c = 11.3092(2) Å                                              | g = 90°.           |
| Volume                 | 4873.85(15) Å <sup>3</sup>                                    |                    |
| Z                      | 4                                                             |                    |
| Density (calculated)   | 1.233 Mg/m <sup>3</sup>                                       |                    |
| Absorption coefficient | 0.406 mm <sup>-1</sup>                                        |                    |
| F(000)                 | 1920                                                          |                    |
| Crystal size           | 0.08 x 0.07 x 0.07 mm <sup>3</sup>                            |                    |

|                                 |                                    |
|---------------------------------|------------------------------------|
| Theta range for data collection | 3.683 to 54.974°.                  |
| Index ranges                    | -12<=h<=11, -52<=k<=50, -13<=l<=10 |
| Reflections collected           | 50921                              |
| Independent reflections         | 9221 [R(int) = 0.0512]             |
| Completeness to theta = 53.594° | 99.5 %                             |
| Absorption correction           | Semi-empirical from equivalents    |
| Max. and min. transmission      | 0.7508 and 0.6402                  |
| Refinement method               | Full-matrix least-squares on F2    |
| Data / restraints / parameters  | 9221 / 0 / 619                     |
| Goodness-of-fit on F2           | 1.012                              |
| Final R indices [I>2sigma(I)]   | R1 = 0.0430, wR2 = 0.1041          |
| R indices (all data)            | R1 = 0.0660, wR2 = 0.1175          |
| Extinction coefficient          | n/a                                |
| Largest diff. peak and hole     | 0.203 and -0.219 e.Å <sup>-3</sup> |

### X-ray Crystallographic Data of Product 4aa

Crystallographic data for **4aa** has been deposited with the Cambridge Crystallographic Data Centre as deposition number CCDC 2194808. These data can be obtained free of charge via [www.ccdc.cam.ac.uk/data\\_request/cif](http://www.ccdc.cam.ac.uk/data_request/cif), or by emailing [data\\_request@ccdc.cam.ac.uk](mailto:data_request@ccdc.cam.ac.uk), or by contacting The Cambridge Crystallographic Data Centre, 12, Union Road, Cambridge CB2 1EZ, UK; fax: +44 1223336033.

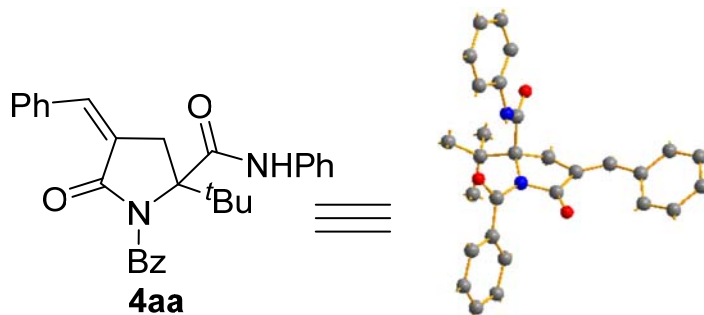

**Table S3. Crystal data and structure refinement for 4aa**

|                                             |                                                               |
|---------------------------------------------|---------------------------------------------------------------|
| Identification code                         | exp_1755_auto                                                 |
| Empirical formula                           | C <sub>29</sub> H <sub>28</sub> N <sub>2</sub> O <sub>3</sub> |
| Formula weight                              | 452.53                                                        |
| Temperature/K                               | 100.00(10)                                                    |
| Crystal system                              | monoclinic                                                    |
| Space group                                 | C2/c                                                          |
| a/Å                                         | 27.6176(2)                                                    |
| b/Å                                         | 9.44290(10)                                                   |
| c/Å                                         | 17.83660(10)                                                  |
| $\alpha$ /°                                 | 90                                                            |
| $\beta$ /°                                  | 92.4570(10)                                                   |
| $\gamma$ /°                                 | 90                                                            |
| Volume/Å <sup>3</sup>                       | 4647.34(7)                                                    |
| Z                                           | 8                                                             |
| $\rho$ calc/cm <sup>3</sup>                 | 1.294                                                         |
| $\mu$ /mm <sup>-1</sup>                     | 0.669                                                         |
| F(000)                                      | 1920.0                                                        |
| Crystal size/mm <sup>3</sup>                | 0.2 × 0.15 × 0.1                                              |
| Radiation                                   | Cu K $\alpha$ ( $\lambda$ = 1.54184)                          |
| 2 $\theta$ range for data collection/°      | 9.9 to 153.24                                                 |
| Index ranges                                | -34 ≤ h ≤ 34, -11 ≤ k ≤ 11, -22 ≤ l ≤ 22                      |
| Reflections collected                       | 38329                                                         |
| Independent reflections                     | 4720 [Rint = 0.0240, Rsigma = 0.0114]                         |
| Data/restraints/parameters                  | 4720/0/311                                                    |
| Goodness-of-fit on F <sup>2</sup>           | 1.056                                                         |
| Final R indexes [ $I \geq 2\sigma(I)$ ]     | R1 = 0.0367, wR2 = 0.0901                                     |
| Final R indexes [all data]                  | R1 = 0.0374, wR2 = 0.0906                                     |
| Largest diff. peak/hole / e Å <sup>-3</sup> | 0.41/-0.41                                                    |

## X-ray Crystallographic Data of Product 5aa

Crystallographic data for **5aa** has been deposited with the Cambridge Crystallographic Data Centre as deposition number CCDC 2194809. These data can be obtained free of charge via [www.ccdc.cam.ac.uk/data\\_request/cif](http://www.ccdc.cam.ac.uk/data_request/cif), or by emailing [data\\_request@ccdc.cam.ac.uk](mailto:data_request@ccdc.cam.ac.uk), or by contacting The Cambridge Crystallographic Data Centre, 12, Union Road, Cambridge CB2 1EZ, UK; fax: +44 1223336033.

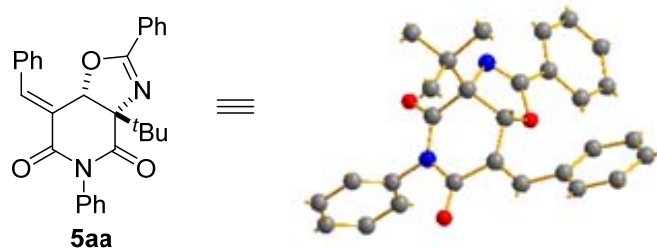

**Table S4. Crystal data and structure refinement for 5aa**

|                                       |                                                               |
|---------------------------------------|---------------------------------------------------------------|
| Identification code                   | exp_1756_auto                                                 |
| Empirical formula                     | C <sub>29</sub> H <sub>26</sub> N <sub>2</sub> O <sub>3</sub> |
| Formula weight                        | 450.52                                                        |
| Temperature/K                         | 100.00(10)                                                    |
| Crystal system                        | triclinic                                                     |
| Space group                           | P-1                                                           |
| <i>a</i> /Å                           | 9.93777(19)                                                   |
| <i>b</i> /Å                           | 10.32738(11)                                                  |
| <i>c</i> /Å                           | 11.6731(2)                                                    |
| $\alpha$ /°                           | 81.4575(12)                                                   |
| $\beta$ /°                            | 87.3485(15)                                                   |
| $\gamma$ /°                           | 81.1675(12)                                                   |
| Volume/Å <sup>3</sup>                 | 1170.34(3)                                                    |
| <i>Z</i>                              | 2                                                             |
| $\rho_{\text{calc}}$ /cm <sup>3</sup> | 1.278                                                         |
| $\mu$ /mm <sup>-1</sup>               | 0.663                                                         |



|                                             |                                          |
|---------------------------------------------|------------------------------------------|
| F(000)                                      | 476.0                                    |
| Crystal size/mm <sup>3</sup>                | 0.15 × 0.1 × 0.07                        |
| Radiation                                   | Cu Kα (λ = 1.54184)                      |
| 2θ range for data collection/°              | 7.66 to 133.194                          |
| Index ranges                                | -11 ≤ h ≤ 10, -12 ≤ k ≤ 12, -13 ≤ l ≤ 13 |
| Reflections collected                       | 38919                                    |
| Independent reflections                     | 4126 [Rint = 0.0289, Rsigma = 0.0125]    |
| Data/restraints/parameters                  | 4126/0/411                               |
| Goodness-of-fit on F <sup>2</sup>           | 1.030                                    |
| Final R indexes [I ≥ 2σ (I)]                | R1 = 0.0335, wR2 = 0.0833                |
| Final R indexes [all data]                  | R1 = 0.0343, wR2 = 0.0839                |
| Largest diff. peak/hole / e Å <sup>-3</sup> | 0.25/-0.25                               |
